# Supplementary material for: snCED-seq: High-fidelity cryogenic enzymatic dissociation of nuclei for single-nucleus RNA-seq of FFPE tissues
Source: Research Square preprint supplement (doi:10.21203/rs.3.rs-5197301/v1), 2024-10-21
Supplement: Supplementary file 1 [file 60f9eeb1bd194bc79386b464.xlsx]

## Sheet: Table3
Supplementary Table 2: The genes overlap between AD celltypes. Fc >0.25; padj<0.01.
Genes	label	Num_Rows
Magi2	UP-regulated	18
Cadm2	UP-regulated	17
Grm7	UP-regulated	17
Adgrl3	UP-regulated	16
Camta1	UP-regulated	16
Ctnna2	UP-regulated	16
Ctnnd2	UP-regulated	16
Dgki	UP-regulated	16
Drc1	UP-regulated	16
Lsamp	UP-regulated	16
Mbd5	UP-regulated	16
Nrg3	UP-regulated	16
Ppfia2	UP-regulated	16
Prkce	UP-regulated	16
Adgrb3	UP-regulated	15
Atrnl1	UP-regulated	15
Bckdhb	UP-regulated	15
Cacna1c	UP-regulated	15
Csmd1	UP-regulated	15
Diaph2	UP-regulated	15
Erc2	UP-regulated	15
Exoc4	UP-regulated	15
Fgf14	UP-regulated	15
Il1rapl1	UP-regulated	15
Inpp4b	UP-regulated	15
Map2	UP-regulated	15
Nav3	UP-regulated	15
Nrxn1	UP-regulated	15
Opcml	UP-regulated	15
Pcdh9	UP-regulated	15
Rabgap1l	UP-regulated	15
Tmeff2	UP-regulated	15
B3galt1	UP-regulated	14
Chsy3	UP-regulated	14
Csmd3	UP-regulated	14
Dgkb	UP-regulated	14
Dlgap1	UP-regulated	14
Dok6	UP-regulated	14
Fbxl17	UP-regulated	14
Fgf12	UP-regulated	14
Gabrb1	UP-regulated	14
Gpm6a	UP-regulated	14
Grik2	UP-regulated	14
Grm1	UP-regulated	14
Kcnd2	UP-regulated	14
Kcnj3	UP-regulated	14
Kcnj6	UP-regulated	14
Kcnq3	UP-regulated	14
Lingo2	UP-regulated	14
Macrod2	UP-regulated	14
Myt1l	UP-regulated	14
Nalf1	UP-regulated	14
Ncam2	UP-regulated	14
Nlgn1	UP-regulated	14
Ppp3ca	UP-regulated	14
Ralyl	UP-regulated	14
Rbfox1	UP-regulated	14
Rgs7	UP-regulated	14
Rims1	UP-regulated	14
Sorbs2	UP-regulated	14
St6galnac3	UP-regulated	14
Zfpm2	UP-regulated	14
Atxn1	UP-regulated	13
Auts2	UP-regulated	13
Cadps	UP-regulated	13
Celf2	UP-regulated	13
Cntnap5a	UP-regulated	13
Dab1	UP-regulated	13
Dock4	UP-regulated	13
Frmd4a	UP-regulated	13
Gabbr2	UP-regulated	13
Gm19465	UP-regulated	13
Gphn	UP-regulated	13
Grin2a	UP-regulated	13
Grm5	UP-regulated	13
Ksr2	UP-regulated	13
Large1	UP-regulated	13
Mmp16	UP-regulated	13
Nr3c2	UP-regulated	13
Plcl1	UP-regulated	13
Plxna4	UP-regulated	13
Ptprd	UP-regulated	13
Pvt1	UP-regulated	13
Rims2	UP-regulated	13
Ryr2	UP-regulated	13
Setbp1	UP-regulated	13
Sgip1	UP-regulated	13
Sh3gl2	UP-regulated	13
Shisa6	UP-regulated	13
Stxbp6	UP-regulated	13
Syn3	UP-regulated	13
Syt1	UP-regulated	13
Tnr	UP-regulated	13
Xkr4	UP-regulated	13
1500004A13Rik	UP-regulated	12
Akap6	UP-regulated	12
Amph	UP-regulated	12
Caln1	UP-regulated	12
Car10	UP-regulated	12
Ccser1	UP-regulated	12
Cdh2	UP-regulated	12
Clstn2	UP-regulated	12
Dclk1	UP-regulated	12
Dlg2	UP-regulated	12
Dmd	UP-regulated	12
Dscam	UP-regulated	12
Enox1	UP-regulated	12
Epha3	UP-regulated	12
Faf1	UP-regulated	12
Fam135b	UP-regulated	12
Fmn2	UP-regulated	12
Galnt17	UP-regulated	12
Gm49353	UP-regulated	12
Gria2	UP-regulated	12
Hs6st3	UP-regulated	12
Kcnip4	UP-regulated	12
Kcnma1	UP-regulated	12
Lrfn5	UP-regulated	12
Lrrc4c	UP-regulated	12
Lrrc7	UP-regulated	12
Lrrtm4	UP-regulated	12
Marchf1	UP-regulated	12
Mdga2	UP-regulated	12
Msra	UP-regulated	12
Nebl	UP-regulated	12
Nell2	UP-regulated	12
Otud7a	UP-regulated	12
Pak5	UP-regulated	12
Pcsk2	UP-regulated	12
Prickle2	UP-regulated	12
Sema6d	UP-regulated	12
Slc24a2	UP-regulated	12
Smyd3	UP-regulated	12
Snhg11	UP-regulated	12
Stk39	UP-regulated	12
Tbc1d5	UP-regulated	12
Tcf4	UP-regulated	12
Tnik	UP-regulated	12
Tspan5	UP-regulated	12
Ube2w	UP-regulated	12
Zbtb20	UP-regulated	12
Ak5	UP-regulated	11
Ank2	UP-regulated	11
Ank3	UP-regulated	11
Astn1	UP-regulated	11
Brinp1	UP-regulated	11
Cacna2d1	UP-regulated	11
Camk1d	UP-regulated	11
Ccdc85a	UP-regulated	11
Cdh9	UP-regulated	11
Cdk14	UP-regulated	11
Cntn1	UP-regulated	11
Cntn4	UP-regulated	11
Edil3	UP-regulated	11
Epha5	UP-regulated	11
Fars2	UP-regulated	11
Fut9	UP-regulated	11
Gabrb2	UP-regulated	11
Gm26871	UP-regulated	11
Grid1	UP-regulated	11
Grin2b	UP-regulated	11
Gtdc1	UP-regulated	11
Hecw1	UP-regulated	11
Kcnb2	UP-regulated	11
Kcnd3	UP-regulated	11
Kctd16	UP-regulated	11
Lrp1b	UP-regulated	11
Mctp1	UP-regulated	11
Mycbp2	UP-regulated	11
Nbea	UP-regulated	11
Negr1	UP-regulated	11
Ntrk3	UP-regulated	11
PTPRG	UP-regulated	11
Phf14	UP-regulated	11
Plcb1	UP-regulated	11
Rbfox3	UP-regulated	11
Sgcz	UP-regulated	11
Shank2	UP-regulated	11
Slc4a10	UP-regulated	11
Slc9a9	UP-regulated	11
Sox5	UP-regulated	11
Stag1	UP-regulated	11
Stxbp5l	UP-regulated	11
Tanc1	UP-regulated	11
Thsd7b	UP-regulated	11
Unc5c	UP-regulated	11
2210408I21Rik	UP-regulated	10
Akt3	UP-regulated	10
Anks1b	UP-regulated	10
Apba1	UP-regulated	10
Arpp21	UP-regulated	10
Astn2	UP-regulated	10
Cacna1e	UP-regulated	10
Cacnb2	UP-regulated	10
Cdh10	UP-regulated	10
Cdh11	UP-regulated	10
Cdkal1	UP-regulated	10
Chl1	UP-regulated	10
Cnksr2	UP-regulated	10
Dlgap2	UP-regulated	10
Dpp6	UP-regulated	10
Dync1i1	UP-regulated	10
Ext1	UP-regulated	10
Fam172a	UP-regulated	10
Fat3	UP-regulated	10
Fhit	UP-regulated	10
Focad	UP-regulated	10
Frmd4b	UP-regulated	10
Gabra2	UP-regulated	10
Gabrb3	UP-regulated	10
Gm36487	UP-regulated	10
Grik4	UP-regulated	10
Hdac9	UP-regulated	10
Hivep2	UP-regulated	10
Immp2l	UP-regulated	10
Jakmip2	UP-regulated	10
Lemd3	UP-regulated	10
Maml2	UP-regulated	10
Mbnl2	UP-regulated	10
Mir99ahg	UP-regulated	10
Nrg1	UP-regulated	10
Nrxn3	UP-regulated	10
Pak3	UP-regulated	10
Pard3	UP-regulated	10
Pcdh7	UP-regulated	10
Pde4d	UP-regulated	10
Prkca	UP-regulated	10
Prkcb	UP-regulated	10
Prkg1	UP-regulated	10
Rapgef4	UP-regulated	10
Robo2	UP-regulated	10
Samd12	UP-regulated	10
Slc16a7	UP-regulated	10
Slc8a1	UP-regulated	10
Snca	UP-regulated	10
Unc5d	UP-regulated	10
Wwox	UP-regulated	10
Zdhhc14	UP-regulated	10
Zfp407	UP-regulated	10
Adcy2	UP-regulated	9
Aig1	UP-regulated	9
Akain1	UP-regulated	9
Ano4	UP-regulated	9
Cacnb4	UP-regulated	9
Cdh13	UP-regulated	9
Celf4	UP-regulated	9
Cfap299	UP-regulated	9
Chrm3	UP-regulated	9
Copg2	UP-regulated	9
Csmd2	UP-regulated	9
Dgkg	UP-regulated	9
Dip2c	UP-regulated	9
Dpp10	UP-regulated	9
Epha7	UP-regulated	9
Exoc6b	UP-regulated	9
Galnt13	UP-regulated	9
Galnt18	UP-regulated	9
Glrb	UP-regulated	9
Gm10649	UP-regulated	9
Gse1	UP-regulated	9
Hivep3	UP-regulated	9
Igf1r	UP-regulated	9
Kcnq5	UP-regulated	9
Klf12	UP-regulated	9
Klhl29	UP-regulated	9
Ncam1	UP-regulated	9
Nkain2	UP-regulated	9
Nol4	UP-regulated	9
Nrcam	UP-regulated	9
Oxr1	UP-regulated	9
Pclo	UP-regulated	9
Plcl2	UP-regulated	9
Plxna2	UP-regulated	9
Prkag2	UP-regulated	9
Prkn	UP-regulated	9
Reps2	UP-regulated	9
Rfx3	UP-regulated	9
Rimbp2	UP-regulated	9
Rnf150	UP-regulated	9
Sema5a	UP-regulated	9
Shisa9	UP-regulated	9
Slc7a14	UP-regulated	9
Sorbs1	UP-regulated	9
Sorcs1	UP-regulated	9
Spock3	UP-regulated	9
St7	UP-regulated	9
St8sia5	UP-regulated	9
Syn2	UP-regulated	9
Tmem178b	UP-regulated	9
Trappc9	UP-regulated	9
Ttll7	UP-regulated	9
Xkr6	UP-regulated	9
5730522E02Rik	UP-regulated	8
6530403H02Rik	UP-regulated	8
Adam22	UP-regulated	8
Ano3	UP-regulated	8
Arl15	UP-regulated	8
Ascc3	UP-regulated	8
Atp8a2	UP-regulated	8
Cacna2d3	UP-regulated	8
Cacng3	UP-regulated	8
Cttnbp2	UP-regulated	8
Dcc	UP-regulated	8
Dennd1b	UP-regulated	8
Dlc1	UP-regulated	8
Epha6	UP-regulated	8
Fam13c	UP-regulated	8
Fmn1	UP-regulated	8
Frmd5	UP-regulated	8
Fto	UP-regulated	8
Fut8	UP-regulated	8
Gmds	UP-regulated	8
Gnaq	UP-regulated	8
Gria1	UP-regulated	8
Gria3	UP-regulated	8
Grid2	UP-regulated	8
Grip1	UP-regulated	8
Kirrel3	UP-regulated	8
Mast4	UP-regulated	8
Mllt10	UP-regulated	8
Nav2	UP-regulated	8
Neto1	UP-regulated	8
Nfia	UP-regulated	8
Nkain3	UP-regulated	8
Nopchap1	UP-regulated	8
Nos1ap	UP-regulated	8
Pbx1	UP-regulated	8
Pcsk5	UP-regulated	8
Phactr1	UP-regulated	8
Plppr5	UP-regulated	8
Ppm1l	UP-regulated	8
Ppp1r9a	UP-regulated	8
Ppp2r2b	UP-regulated	8
Prkd1	UP-regulated	8
Psd3	UP-regulated	8
Ptprk	UP-regulated	8
Rit2	UP-regulated	8
Sgcd	UP-regulated	8
Slc35f1	UP-regulated	8
Slc35f3	UP-regulated	8
Snd1	UP-regulated	8
Sntg1	UP-regulated	8
Sybu	UP-regulated	8
Synpr	UP-regulated	8
Tenm2	UP-regulated	8
Tmem108	UP-regulated	8
Vps13b	UP-regulated	8
A230057D06Rik	UP-regulated	7
Acaca	UP-regulated	7
Adk	UP-regulated	7
Agbl4	UP-regulated	7
Cacna1d	UP-regulated	7
Cadm1	UP-regulated	7
Cblb	UP-regulated	7
Cdh18	UP-regulated	7
Cdh8	UP-regulated	7
Clvs1	UP-regulated	7
Cmip	UP-regulated	7
Cntn3	UP-regulated	7
Cntnap2	UP-regulated	7
Csgalnact1	UP-regulated	7
Csrnp3	UP-regulated	7
Cyp7b1	UP-regulated	7
D430041D05Rik	UP-regulated	7
Dpyd	UP-regulated	7
Eml6	UP-regulated	7
Erc1	UP-regulated	7
Etv6	UP-regulated	7
Fgf13	UP-regulated	7
Frmpd4	UP-regulated	7
Fry	UP-regulated	7
Fyn	UP-regulated	7
Gabra4	UP-regulated	7
Gm20754	UP-regulated	7
Gm4258	UP-regulated	7
Gm49678	UP-regulated	7
Gsg1l	UP-regulated	7
Hace1	UP-regulated	7
Hcn1	UP-regulated	7
Iqsec1	UP-regulated	7
Jazf1	UP-regulated	7
Kdm4c	UP-regulated	7
Khdrbs2	UP-regulated	7
Kif26b	UP-regulated	7
Ldlrad4	UP-regulated	7
Lrrtm3	UP-regulated	7
Maml3	UP-regulated	7
Med12l	UP-regulated	7
Mitf	UP-regulated	7
Mllt3	UP-regulated	7
Naaladl2	UP-regulated	7
Nalcn	UP-regulated	7
Ncoa2	UP-regulated	7
Nfib	UP-regulated	7
Pde8b	UP-regulated	7
Phlpp1	UP-regulated	7
Pkp4	UP-regulated	7
Polb	UP-regulated	7
Ppp1r14c	UP-regulated	7
Ptprn2	UP-regulated	7
Ptprt	UP-regulated	7
Qki	UP-regulated	7
Rcan2	UP-regulated	7
Rgs6	UP-regulated	7
Rnf165	UP-regulated	7
Robo1	UP-regulated	7
Rsu1	UP-regulated	7
Slc24a3	UP-regulated	7
Slit3	UP-regulated	7
Sobp	UP-regulated	7
St6galnac5	UP-regulated	7
Syne1	UP-regulated	7
Syt16	UP-regulated	7
Tafa5	UP-regulated	7
Tasp1	UP-regulated	7
Tbl1xr1	UP-regulated	7
Tenm3	UP-regulated	7
Tiam1	UP-regulated	7
Tmem135	UP-regulated	7
Trpm3	UP-regulated	7
Trps1	UP-regulated	7
Ubash3b	UP-regulated	7
Ube2e2	UP-regulated	7
Xylt1	UP-regulated	7
Zeb2	UP-regulated	7
Zfp385b	UP-regulated	7
Zmat4	UP-regulated	7
2610035D17Rik	UP-regulated	6
AW554918	UP-regulated	6
Ablim1	UP-regulated	6
Acvr1	UP-regulated	6
Adamts3	UP-regulated	6
Aff2	UP-regulated	6
Alcam	UP-regulated	6
Ank	UP-regulated	6
Aopep	UP-regulated	6
Apba2	UP-regulated	6
Asap1	UP-regulated	6
Asxl3	UP-regulated	6
B230303A05Rik	UP-regulated	6
Bbx	UP-regulated	6
Bcl11a	UP-regulated	6
Bicd1	UP-regulated	6
Bmerb1	UP-regulated	6
Brinp3	UP-regulated	6
Camkmt	UP-regulated	6
Cask	UP-regulated	6
Ccdc148	UP-regulated	6
Cdk13	UP-regulated	6
Chchd3	UP-regulated	6
Cntn5	UP-regulated	6
Cntnap5b	UP-regulated	6
Cop1	UP-regulated	6
Cpe	UP-regulated	6
Crppa	UP-regulated	6
Dnajc6	UP-regulated	6
Dnm3	UP-regulated	6
Dpysl2	UP-regulated	6
E130307A14Rik	UP-regulated	6
Elmo1	UP-regulated	6
Ephb1	UP-regulated	6
Etl4	UP-regulated	6
Faxc	UP-regulated	6
Gfod1	UP-regulated	6
Glis3	UP-regulated	6
Gm10125	UP-regulated	6
Gm20696	UP-regulated	6
Gm6999	UP-regulated	6
Gpc6	UP-regulated	6
Grb14	UP-regulated	6
Gria4	UP-regulated	6
Gsk3b	UP-regulated	6
Hs3st4	UP-regulated	6
Htr4	UP-regulated	6
Ica1	UP-regulated	6
Il1rap	UP-regulated	6
Jdp2	UP-regulated	6
Kalrn	UP-regulated	6
Kazn	UP-regulated	6
Kcnab1	UP-regulated	6
Kcnn2	UP-regulated	6
Kcnt2	UP-regulated	6
Kif16b	UP-regulated	6
Lcorl	UP-regulated	6
Ldb2	UP-regulated	6
Lhfpl3	UP-regulated	6
Limch1	UP-regulated	6
Lpp	UP-regulated	6
Lrfn2	UP-regulated	6
Lrmda	UP-regulated	6
Luzp2	UP-regulated	6
Lyst	UP-regulated	6
Map2k5	UP-regulated	6
Mapk10	UP-regulated	6
Mcph1	UP-regulated	6
Mgat4c	UP-regulated	6
Mnat1	UP-regulated	6
Mpped2	UP-regulated	6
Mtmr1	UP-regulated	6
Nr3c1	UP-regulated	6
Nrg2	UP-regulated	6
Ntm	UP-regulated	6
Nyap2	UP-regulated	6
Ophn1	UP-regulated	6
Pam	UP-regulated	6
Parp8	UP-regulated	6
Pcdh15	UP-regulated	6
Pex5l	UP-regulated	6
Pitpnc1	UP-regulated	6
Pkia	UP-regulated	6
Plxdc2	UP-regulated	6
Ppm1e	UP-regulated	6
Ppm1h	UP-regulated	6
Prkaa2	UP-regulated	6
Prr16	UP-regulated	6
Ptk2	UP-regulated	6
Rap1gds1	UP-regulated	6
Rasal2	UP-regulated	6
Rasgef1a	UP-regulated	6
Rgs7bp	UP-regulated	6
Rora	UP-regulated	6
Rsrc1	UP-regulated	6
Ryr3	UP-regulated	6
Sema3e	UP-regulated	6
Sgk1	UP-regulated	6
Sh3rf3	UP-regulated	6
Slc16a10	UP-regulated	6
Ssh2	UP-regulated	6
Stxbp5	UP-regulated	6
Supt3	UP-regulated	6
Sv2b	UP-regulated	6
Syt14	UP-regulated	6
Tafa1	UP-regulated	6
Tafa2	UP-regulated	6
Tenm4	UP-regulated	6
Tfdp2	UP-regulated	6
Thsd7a	UP-regulated	6
Tle1	UP-regulated	6
Tmcc1	UP-regulated	6
Tmem117	UP-regulated	6
Upp2	UP-regulated	6
Ust	UP-regulated	6
Vsnl1	UP-regulated	6
Wdr7	UP-regulated	6
Wipf3	UP-regulated	6
Xpr1	UP-regulated	6
Zbtb16	UP-regulated	6
Zswim6	UP-regulated	6
2210408F21Rik	UP-regulated	5
A230006K03Rik	UP-regulated	5
A330008L17Rik	UP-regulated	5
Abhd12	UP-regulated	5
Adarb2	UP-regulated	5
Adcy9	UP-regulated	5
Ahcyl2	UP-regulated	5
App	UP-regulated	5
Arhgap44	UP-regulated	5
Arid1b	UP-regulated	5
Asic2	UP-regulated	5
Atp2b1	UP-regulated	5
Atxn7l1	UP-regulated	5
Baalc	UP-regulated	5
Bcas3	UP-regulated	5
Btbd9	UP-regulated	5
C130071C03Rik	UP-regulated	5
Camk4	UP-regulated	5
Ccdc88a	UP-regulated	5
Ccny	UP-regulated	5
Cdkl5	UP-regulated	5
Cdyl2	UP-regulated	5
Cers6	UP-regulated	5
Chn1	UP-regulated	5
Cnot2	UP-regulated	5
Cnot4	UP-regulated	5
Cog5	UP-regulated	5
Cpne4	UP-regulated	5
Cyria	UP-regulated	5
Daam1	UP-regulated	5
Dennd1a	UP-regulated	5
Dner	UP-regulated	5
Dock10	UP-regulated	5
Dock3	UP-regulated	5
Dok5	UP-regulated	5
Dpf3	UP-regulated	5
Dscaml1	UP-regulated	5
Dym	UP-regulated	5
ENSMUSG00000120285	UP-regulated	5
Egfem1	UP-regulated	5
Ehbp1	UP-regulated	5
Elovl6	UP-regulated	5
Fer	UP-regulated	5
Fggy	UP-regulated	5
Fmnl2	UP-regulated	5
Fnip2	UP-regulated	5
Gab2	UP-regulated	5
Gabra1	UP-regulated	5
Galnt9	UP-regulated	5
Galntl6	UP-regulated	5
Gas7	UP-regulated	5
Gm49797	UP-regulated	5
Gnai1	UP-regulated	5
Gng2	UP-regulated	5
Gpm6b	UP-regulated	5
Hecw2	UP-regulated	5
Hmgcll1	UP-regulated	5
Homer1	UP-regulated	5
Hspa12a	UP-regulated	5
Jakmip3	UP-regulated	5
Jmjd1c	UP-regulated	5
Kcnh7	UP-regulated	5
Kcnk1	UP-regulated	5
Kctd1	UP-regulated	5
Kif5c	UP-regulated	5
Lcor	UP-regulated	5
Lhfp	UP-regulated	5
Lrrn2	UP-regulated	5
Lurap1l	UP-regulated	5
Magi1	UP-regulated	5
Mapk4	UP-regulated	5
Mbp	UP-regulated	5
Mef2c	UP-regulated	5
Mgat5	UP-regulated	5
Mtmr7	UP-regulated	5
Myrip	UP-regulated	5
Nckap5	UP-regulated	5
Ncoa7	UP-regulated	5
Ntrk2	UP-regulated	5
Pakap	UP-regulated	5
Pcca	UP-regulated	5
Pcdh11x	UP-regulated	5
Pcmtd1	UP-regulated	5
Pde1a	UP-regulated	5
Pde7b	UP-regulated	5
Pibf1	UP-regulated	5
Pid1	UP-regulated	5
Ppargc1b	UP-regulated	5
Ppp2r2c	UP-regulated	5
Ppp2r3a	UP-regulated	5
Prickle1	UP-regulated	5
Ptk2b	UP-regulated	5
Ptpre	UP-regulated	5
Rapgef2	UP-regulated	5
Rapgef5	UP-regulated	5
Rgl1	UP-regulated	5
Samd5	UP-regulated	5
Sbf2	UP-regulated	5
Scaper	UP-regulated	5
Sdk1	UP-regulated	5
Senp7	UP-regulated	5
Sh3kbp1	UP-regulated	5
Slc22a23	UP-regulated	5
Slc39a11	UP-regulated	5
Slc44a1	UP-regulated	5
Smoc2	UP-regulated	5
Snap25	UP-regulated	5
Snx24	UP-regulated	5
Snx29	UP-regulated	5
Sorcs2	UP-regulated	5
Sorl1	UP-regulated	5
Specc1	UP-regulated	5
Spock1	UP-regulated	5
Srgap3	UP-regulated	5
Ssbp2	UP-regulated	5
Stau2	UP-regulated	5
Stk3	UP-regulated	5
Tanc2	UP-regulated	5
Thrb	UP-regulated	5
Tmtc2	UP-regulated	5
Trim2	UP-regulated	5
Trim9	UP-regulated	5
Tshz2	UP-regulated	5
Vav3	UP-regulated	5
Zeb1	UP-regulated	5
Zfp804a	UP-regulated	5
Znrf1	UP-regulated	5
5730419F03Rik	UP-regulated	4
9330162G02Rik	UP-regulated	4
9530059O14Rik	UP-regulated	4
A330023F24Rik	UP-regulated	4
A830018L16Rik	UP-regulated	4
Abi1	UP-regulated	4
Acap2	UP-regulated	4
Actr3b	UP-regulated	4
Adamts17	UP-regulated	4
Aff3	UP-regulated	4
Ankib1	UP-regulated	4
Ankrd11	UP-regulated	4
Ankrd33b	UP-regulated	4
Arap2	UP-regulated	4
Arhgap12	UP-regulated	4
Arhgap35	UP-regulated	4
Arid5b	UP-regulated	4
Armh4	UP-regulated	4
Arsb	UP-regulated	4
Atf6	UP-regulated	4
Atg10	UP-regulated	4
Atp2b2	UP-regulated	4
Atp8a1	UP-regulated	4
Atp9b	UP-regulated	4
Atxn10	UP-regulated	4
Basp1	UP-regulated	4
Baz2b	UP-regulated	4
Birc6	UP-regulated	4
Brwd3	UP-regulated	4
Cacna1i	UP-regulated	4
Catspere2	UP-regulated	4
Ccser2	UP-regulated	4
Cdh12	UP-regulated	4
Cdh20	UP-regulated	4
Cdk18	UP-regulated	4
Cemip	UP-regulated	4
Chm	UP-regulated	4
Cnih3	UP-regulated	4
Cnnm1	UP-regulated	4
Cntn6	UP-regulated	4
Commd10	UP-regulated	4
Cpeb3	UP-regulated	4
Crtac1	UP-regulated	4
Ctnna3	UP-regulated	4
Cwc27	UP-regulated	4
Cyp2c52-ps	UP-regulated	4
Cyrib	UP-regulated	4
Dcaf6	UP-regulated	4
Dst	UP-regulated	4
Dtna	UP-regulated	4
E230016M11Rik	UP-regulated	4
E2f3	UP-regulated	4
ENSMUSG00000120164	UP-regulated	4
Elavl2	UP-regulated	4
Epb41l3	UP-regulated	4
Epha4	UP-regulated	4
Epm2a	UP-regulated	4
Erbb4	UP-regulated	4
Exoc2	UP-regulated	4
Fam171b	UP-regulated	4
Fam78b	UP-regulated	4
Fgd4	UP-regulated	4
Flrt2	UP-regulated	4
Fstl4	UP-regulated	4
Gabra5	UP-regulated	4
Galnt14	UP-regulated	4
Galnt7	UP-regulated	4
Gap43	UP-regulated	4
Garem1	UP-regulated	4
Gm26691	UP-regulated	4
Gm30092	UP-regulated	4
Gm31508	UP-regulated	4
Gm32647	UP-regulated	4
Gm41414	UP-regulated	4
Gm46123	UP-regulated	4
Gng12	UP-regulated	4
Gpc5	UP-regulated	4
Gpr158	UP-regulated	4
Gprasp1	UP-regulated	4
Grm3	UP-regulated	4
Grm8	UP-regulated	4
Hacd2	UP-regulated	4
Hs6st2	UP-regulated	4
Igsf11	UP-regulated	4
Itga8	UP-regulated	4
Kcnc2	UP-regulated	4
Kcnh1	UP-regulated	4
Kcnq1ot1	UP-regulated	4
Khdrbs3	UP-regulated	4
Kmt2c	UP-regulated	4
Lekr1	UP-regulated	4
Lncpint	UP-regulated	4
Lonrf2	UP-regulated	4
Marchf4	UP-regulated	4
Mblac2	UP-regulated	4
Mbnl1	UP-regulated	4
Mcu	UP-regulated	4
Megf9	UP-regulated	4
Mfhas1	UP-regulated	4
Mtus2	UP-regulated	4
Myo16	UP-regulated	4
Nbas	UP-regulated	4
Nedd4l	UP-regulated	4
Nell1	UP-regulated	4
Nexmif	UP-regulated	4
Nfasc	UP-regulated	4
Npas3	UP-regulated	4
Nptn	UP-regulated	4
Nr6a1	UP-regulated	4
Nrp1	UP-regulated	4
Nsf	UP-regulated	4
Nsmce2	UP-regulated	4
Nuak1	UP-regulated	4
Nxpe4	UP-regulated	4
Olfm2	UP-regulated	4
Osbp2	UP-regulated	4
Osbpl6	UP-regulated	4
Pacrg	UP-regulated	4
Pde3b	UP-regulated	4
Pde4b	UP-regulated	4
Pde4dip	UP-regulated	4
Pde7a	UP-regulated	4
Pdss2	UP-regulated	4
Phc2	UP-regulated	4
Plekha5	UP-regulated	4
Plppr1	UP-regulated	4
Plppr4	UP-regulated	4
Ppp6r3	UP-regulated	4
Ptchd4	UP-regulated	4
Ptdss1	UP-regulated	4
Ptpn4	UP-regulated	4
Ptpro	UP-regulated	4
Ramp1	UP-regulated	4
Ranbp17	UP-regulated	4
Rasgef1b	UP-regulated	4
Rbms1	UP-regulated	4
Rbms3	UP-regulated	4
Rev3l	UP-regulated	4
Rnf180	UP-regulated	4
Ror1	UP-regulated	4
Rundc3b	UP-regulated	4
Runx1t1	UP-regulated	4
Sash1	UP-regulated	4
Sclt1	UP-regulated	4
Scn2a	UP-regulated	4
Sergef	UP-regulated	4
Sgms1	UP-regulated	4
Sik3	UP-regulated	4
Slc35f4	UP-regulated	4
Slc4a4	UP-regulated	4
Slc8a3	UP-regulated	4
Snx25	UP-regulated	4
Sorcs3	UP-regulated	4
Spata5	UP-regulated	4
Sphkap	UP-regulated	4
Srpk2	UP-regulated	4
St8sia1	UP-regulated	4
Stox2	UP-regulated	4
Susd4	UP-regulated	4
Sv2c	UP-regulated	4
Tcf12	UP-regulated	4
Tcf20	UP-regulated	4
Tmem132b	UP-regulated	4
Tmem132d	UP-regulated	4
Trhde	UP-regulated	4
Trim44	UP-regulated	4
Trpc5	UP-regulated	4
Ttc28	UP-regulated	4
Ttc39c	UP-regulated	4
Ttll11	UP-regulated	4
Usp25	UP-regulated	4
Usp46	UP-regulated	4
Uxs1	UP-regulated	4
Vti1a	UP-regulated	4
Wdr33	UP-regulated	4
Wdr44	UP-regulated	4
Wscd2	UP-regulated	4
Zcchc7	UP-regulated	4
Zfand3	UP-regulated	4
Zfp608	UP-regulated	4
Zfp697	UP-regulated	4
2610005L07Rik.1	UP-regulated	3
9530026P05Rik	UP-regulated	3
Acvr2a	UP-regulated	3
Acyp2	UP-regulated	3
Agap1	UP-regulated	3
Agmo	UP-regulated	3
Apbb2	UP-regulated	3
Arfgef1	UP-regulated	3
Arfgef3	UP-regulated	3
Arhgap22	UP-regulated	3
Arhgef28	UP-regulated	3
Arhgef9	UP-regulated	3
Arid4b	UP-regulated	3
Arnt2	UP-regulated	3
Arsj	UP-regulated	3
Bbs9	UP-regulated	3
Bcl2	UP-regulated	3
C2cd5	UP-regulated	3
Cadm3	UP-regulated	3
Carmil1	UP-regulated	3
Ccbe1	UP-regulated	3
Cdc73	UP-regulated	3
Cdk17	UP-regulated	3
Cep128	UP-regulated	3
Chrna7	UP-regulated	3
Cnot6l	UP-regulated	3
Cobll1	UP-regulated	3
Ctif	UP-regulated	3
Dis3l2	UP-regulated	3
Dock1	UP-regulated	3
Dock7	UP-regulated	3
Dock9	UP-regulated	3
Dtnbp1	UP-regulated	3
Dync2h1	UP-regulated	3
ENSMUSG00000120031	UP-regulated	3
ENSMUSG00000120237	UP-regulated	3
Ecpas	UP-regulated	3
Eea1	UP-regulated	3
Enox2	UP-regulated	3
Entrep2	UP-regulated	3
Epc2	UP-regulated	3
Ephb2	UP-regulated	3
Esrrg	UP-regulated	3
Evc2	UP-regulated	3
Eya1	UP-regulated	3
Eya4	UP-regulated	3
Fam110b	UP-regulated	3
Fam168a	UP-regulated	3
Fam171a1	UP-regulated	3
Fbxl7	UP-regulated	3
Fbxo11	UP-regulated	3
Fbxw7	UP-regulated	3
Foxn3	UP-regulated	3
Foxp1	UP-regulated	3
Fras1	UP-regulated	3
Fstl5	UP-regulated	3
Gabrg2	UP-regulated	3
Gm12610	UP-regulated	3
Gm14410	UP-regulated	3
Gm26652	UP-regulated	3
Gm30382	UP-regulated	3
Gm32014	UP-regulated	3
Gm9866	UP-regulated	3
Gnao1	UP-regulated	3
Greb1l	UP-regulated	3
Grik1	UP-regulated	3
Gucy1a2	UP-regulated	3
Hdac8	UP-regulated	3
Htr1f	UP-regulated	3
Insr	UP-regulated	3
Ints6	UP-regulated	3
Irf2	UP-regulated	3
Jph1	UP-regulated	3
Kcnk10	UP-regulated	3
Kcnk9	UP-regulated	3
Kctd8	UP-regulated	3
Klf7	UP-regulated	3
Klhl2	UP-regulated	3
Klhl3	UP-regulated	3
Klhl32	UP-regulated	3
Larp1b	UP-regulated	3
Lmbr1	UP-regulated	3
Lrba	UP-regulated	3
Lrrc8c	UP-regulated	3
Man1a	UP-regulated	3
Man1c1	UP-regulated	3
Man2a1	UP-regulated	3
Map1b	UP-regulated	3
Map2k4	UP-regulated	3
Map4k4	UP-regulated	3
Map7d2	UP-regulated	3
Marchf11	UP-regulated	3
Me3	UP-regulated	3
Mindy3	UP-regulated	3
Mir100hg	UP-regulated	3
Nav1	UP-regulated	3
Ncald	UP-regulated	3
Nck2	UP-regulated	3
Ncoa1	UP-regulated	3
Ndufs4	UP-regulated	3
Nlk	UP-regulated	3
Nrp2	UP-regulated	3
Nt5c2	UP-regulated	3
Nwd2	UP-regulated	3
Nxpe3	UP-regulated	3
Ocrl	UP-regulated	3
Olfm1	UP-regulated	3
Orc4	UP-regulated	3
Osbpl10	UP-regulated	3
Osbpl8	UP-regulated	3
Oxct1	UP-regulated	3
Pak1	UP-regulated	3
Pals2	UP-regulated	3
Papss1	UP-regulated	3
Paqr8	UP-regulated	3
Pcnx2	UP-regulated	3
Pdzd2	UP-regulated	3
Peak1	UP-regulated	3
Phactr3	UP-regulated	3
Phf20l1	UP-regulated	3
Phka2	UP-regulated	3
Phkb	UP-regulated	3
Pias2	UP-regulated	3
Pnpla8	UP-regulated	3
Pou6f2	UP-regulated	3
Ppargc1a	UP-regulated	3
Ppp2r5e	UP-regulated	3
Prmt8	UP-regulated	3
Prox1	UP-regulated	3
Ptprm	UP-regulated	3
Ptprn	UP-regulated	3
Purg	UP-regulated	3
Qpct	UP-regulated	3
Rab27b	UP-regulated	3
Rab28	UP-regulated	3
Rab3c	UP-regulated	3
Rab6b	UP-regulated	3
Rasgrf1	UP-regulated	3
Rasgrf2	UP-regulated	3
Rbfox2	UP-regulated	3
Rbm6	UP-regulated	3
Rere	UP-regulated	3
Rfx7	UP-regulated	3
Rnf115	UP-regulated	3
Rnf182	UP-regulated	3
Rngtt	UP-regulated	3
Rps6ka3	UP-regulated	3
Rtl4	UP-regulated	3
Rtn1	UP-regulated	3
Rtn3	UP-regulated	3
Rtn4rl1	UP-regulated	3
Runx2	UP-regulated	3
Sacs	UP-regulated	3
Scfd2	UP-regulated	3
Scn1a	UP-regulated	3
Scn8a	UP-regulated	3
Serpini1	UP-regulated	3
Sez6l	UP-regulated	3
Sh3rf1	UP-regulated	3
Shtn1	UP-regulated	3
Sipa1l1	UP-regulated	3
Slc2a13	UP-regulated	3
Slc44a5	UP-regulated	3
Slc9a7	UP-regulated	3
Slit1	UP-regulated	3
Slmap	UP-regulated	3
Smad3	UP-regulated	3
Snap91	UP-regulated	3
Snx13	UP-regulated	3
Snx30	UP-regulated	3
Sox2ot	UP-regulated	3
Sox6	UP-regulated	3
Spink10	UP-regulated	3
Spon1	UP-regulated	3
St3gal3	UP-regulated	3
Stim2	UP-regulated	3
Strbp	UP-regulated	3
Syndig1	UP-regulated	3
Taok3	UP-regulated	3
Tbc1d1	UP-regulated	3
Tjp1	UP-regulated	3
Tle4	UP-regulated	3
Tmcc3	UP-regulated	3
Tmem150c	UP-regulated	3
Tmem163	UP-regulated	3
Trak1	UP-regulated	3
Trio	UP-regulated	3
Trpc6	UP-regulated	3
Tsc22d1	UP-regulated	3
Tspan7	UP-regulated	3
Ttc3	UP-regulated	3
Ttc7b	UP-regulated	3
Unc79	UP-regulated	3
Usp29	UP-regulated	3
Usp32	UP-regulated	3
Uvrag	UP-regulated	3
Vopp1	UP-regulated	3
Wdr70	UP-regulated	3
Xrcc4	UP-regulated	3
Zfp148	UP-regulated	3
Zfp536	UP-regulated	3
Zfp804b	UP-regulated	3
Zhx2	UP-regulated	3
Zmiz1	UP-regulated	3
1700025G04Rik	UP-regulated	2
1700087I21Rik	UP-regulated	2
2310002F09Rik	UP-regulated	2
4930578G10Rik	UP-regulated	2
4933406I18Rik	UP-regulated	2
5031425E22Rik	UP-regulated	2
9530052E02Rik	UP-regulated	2
Aak1	UP-regulated	2
Abhd6	UP-regulated	2
Abl2	UP-regulated	2
Acer3	UP-regulated	2
Acsl4	UP-regulated	2
Adam23	UP-regulated	2
Adamts18	UP-regulated	2
Adamts2	UP-regulated	2
Adamts9	UP-regulated	2
Adamtsl1	UP-regulated	2
Add2	UP-regulated	2
Add3	UP-regulated	2
Agbl1	UP-regulated	2
Agtpbp1	UP-regulated	2
Akap13	UP-regulated	2
Alk	UP-regulated	2
Ambra1	UP-regulated	2
Amy1	UP-regulated	2
Angpt1	UP-regulated	2
Ankrd44	UP-regulated	2
Apc	UP-regulated	2
Arhgap15	UP-regulated	2
Arhgap17	UP-regulated	2
Arhgap24	UP-regulated	2
Arhgap26.1	UP-regulated	2
Arhgap32	UP-regulated	2
Arid4a	UP-regulated	2
Arih1	UP-regulated	2
Arntl	UP-regulated	2
Asb3	UP-regulated	2
Atp11c	UP-regulated	2
Atp9a	UP-regulated	2
Atpsckmt	UP-regulated	2
B230209E15Rik	UP-regulated	2
B3galt5	UP-regulated	2
Babam2	UP-regulated	2
Bach2	UP-regulated	2
Bccip	UP-regulated	2
Bcl11b	UP-regulated	2
Bcl2l1	UP-regulated	2
Bcr	UP-regulated	2
Bicdl1	UP-regulated	2
Bmpr2	UP-regulated	2
Brinp2	UP-regulated	2
Cacna1b	UP-regulated	2
Cacng8	UP-regulated	2
Cap2	UP-regulated	2
Cdc42bpa	UP-regulated	2
Cdh19	UP-regulated	2
Cep112	UP-regulated	2
Cep85l	UP-regulated	2
Chd7	UP-regulated	2
Chn2	UP-regulated	2
Chpt1	UP-regulated	2
Chst11	UP-regulated	2
Chst9	UP-regulated	2
Clec16a	UP-regulated	2
Clvs2	UP-regulated	2
Cntnap5c	UP-regulated	2
Cobl	UP-regulated	2
Cpq	UP-regulated	2
Creb5	UP-regulated	2
Csnk1g1	UP-regulated	2
Csnk1g3	UP-regulated	2
D630045J12Rik	UP-regulated	2
D7Ertd443e	UP-regulated	2
Dcaf5	UP-regulated	2
Dchs2	UP-regulated	2
Ddx10	UP-regulated	2
Dennd4a	UP-regulated	2
Dennd5b	UP-regulated	2
Dennd6a	UP-regulated	2
Desi2	UP-regulated	2
Dgkh	UP-regulated	2
Dip2b	UP-regulated	2
Dipk1a	UP-regulated	2
Dlg1	UP-regulated	2
Dlgap3	UP-regulated	2
Dmxl2	UP-regulated	2
Dnah9	UP-regulated	2
Dnajc1	UP-regulated	2
Dnmt3a	UP-regulated	2
Ebf1	UP-regulated	2
Eda	UP-regulated	2
Eepd1	UP-regulated	2
Ehmt1	UP-regulated	2
Elavl3	UP-regulated	2
Ell2	UP-regulated	2
Elmod1	UP-regulated	2
Elp4	UP-regulated	2
Eml4	UP-regulated	2
Fam120c	UP-regulated	2
Fam193a	UP-regulated	2
Fbxo34	UP-regulated	2
Fez1	UP-regulated	2
Fhod3	UP-regulated	2
Fign	UP-regulated	2
Fndc3a	UP-regulated	2
Gabrg3	UP-regulated	2
Galnt16	UP-regulated	2
Ghr	UP-regulated	2
Gjc3	UP-regulated	2
Glg1	UP-regulated	2
Gm1043	UP-regulated	2
Gm10754	UP-regulated	2
Gm13629	UP-regulated	2
Gm15155	UP-regulated	2
Gm15645	UP-regulated	2
Gm19410	UP-regulated	2
Gm2164	UP-regulated	2
Gm2824	UP-regulated	2
Gm31615	UP-regulated	2
Gm31698	UP-regulated	2
Gm33228	UP-regulated	2
Gm38393	UP-regulated	2
Gm44257	UP-regulated	2
Gm48743	UP-regulated	2
Gm49674	UP-regulated	2
Gm9801	UP-regulated	2
Gna12	UP-regulated	2
Gpr137c	UP-regulated	2
Gprin3	UP-regulated	2
Grik5	UP-regulated	2
Haao	UP-regulated	2
Hcfc2	UP-regulated	2
Hdgfl3	UP-regulated	2
Herc1	UP-regulated	2
Hipk2	UP-regulated	2
Hrh2	UP-regulated	2
Hs2st1	UP-regulated	2
Inpp5a	UP-regulated	2
Ipo11	UP-regulated	2
Iqgap2	UP-regulated	2
Iqsec2	UP-regulated	2
Itfg1	UP-regulated	2
Itpkb	UP-regulated	2
Itpr2	UP-regulated	2
Itsn2	UP-regulated	2
Jak1	UP-regulated	2
Jarid2	UP-regulated	2
Kansl1	UP-regulated	2
Kantr	UP-regulated	2
Kat6b	UP-regulated	2
Kcnh5	UP-regulated	2
Kcnip1	UP-regulated	2
Kcnk13	UP-regulated	2
Kcnmb2	UP-regulated	2
Kif21a	UP-regulated	2
Kifap3	UP-regulated	2
Klc1	UP-regulated	2
Klf13	UP-regulated	2
Klhl18	UP-regulated	2
Kpna4	UP-regulated	2
Lama2	UP-regulated	2
Lamc1	UP-regulated	2
Lin7a	UP-regulated	2
Lingo1	UP-regulated	2
Lmo3	UP-regulated	2
Lpin2	UP-regulated	2
Lrch1	UP-regulated	2
Lrrfip1	UP-regulated	2
Lrrn1	UP-regulated	2
Lzts1	UP-regulated	2
Map2k6	UP-regulated	2
Map3k13	UP-regulated	2
Map3k2	UP-regulated	2
Map6	UP-regulated	2
Marchf8	UP-regulated	2
Mboat2	UP-regulated	2
Mcc	UP-regulated	2
Mctp2	UP-regulated	2
Me1	UP-regulated	2
Mecp2	UP-regulated	2
Mef2a	UP-regulated	2
Megf11	UP-regulated	2
Meis2	UP-regulated	2
Mical3	UP-regulated	2
Mipol1	UP-regulated	2
Mlip	UP-regulated	2
Mlycd	UP-regulated	2
Mmd2	UP-regulated	2
Mpped1	UP-regulated	2
Mrps28	UP-regulated	2
Mrtfb	UP-regulated	2
Mvb12b	UP-regulated	2
Myo1d	UP-regulated	2
Myo9a	UP-regulated	2
Nceh1	UP-regulated	2
Ncoa6	UP-regulated	2
Ndst3	UP-regulated	2
Ndst4	UP-regulated	2
Necab1	UP-regulated	2
Nek1	UP-regulated	2
Neto2	UP-regulated	2
Neurl1a	UP-regulated	2
Nf1	UP-regulated	2
Nfatc2	UP-regulated	2
Nfkb1	UP-regulated	2
Nkx2-2os	UP-regulated	2
Nmnat2	UP-regulated	2
Nol4l	UP-regulated	2
Nrf1	UP-regulated	2
Nsd1	UP-regulated	2
Nsg2	UP-regulated	2
Nxph1	UP-regulated	2
Ola1	UP-regulated	2
Olfm3	UP-regulated	2
Osbpl1a	UP-regulated	2
P3h2	UP-regulated	2
Pacs1	UP-regulated	2
Pacsin1	UP-regulated	2
Pan3	UP-regulated	2
Pank1	UP-regulated	2
Pantr1	UP-regulated	2
Pard3b	UP-regulated	2
Pced1b	UP-regulated	2
Pde10a	UP-regulated	2
Pdpk1	UP-regulated	2
Pdzrn3	UP-regulated	2
Pfkfb3	UP-regulated	2
Phf21a	UP-regulated	2
Phtf2	UP-regulated	2
Pias1	UP-regulated	2
Pip4k2a	UP-regulated	2
Plcb4	UP-regulated	2
Plce1	UP-regulated	2
Plekhg1	UP-regulated	2
Plpp1	UP-regulated	2
Plpp4	UP-regulated	2
Pls3	UP-regulated	2
Ppp1r12b	UP-regulated	2
Prdm5	UP-regulated	2
Prkar1b	UP-regulated	2
Prkcq	UP-regulated	2
Prlr	UP-regulated	2
Psmd14	UP-regulated	2
Ptpra	UP-regulated	2
Ptprr	UP-regulated	2
Rab2a	UP-regulated	2
Rab30	UP-regulated	2
Rabep1	UP-regulated	2
Ralgapa2	UP-regulated	2
Ralgps1	UP-regulated	2
Ranbp9	UP-regulated	2
Rap1gap2	UP-regulated	2
Rasgrp1	UP-regulated	2
Rb1	UP-regulated	2
Rcan1	UP-regulated	2
Reep1	UP-regulated	2
Relch	UP-regulated	2
Retreg1	UP-regulated	2
Rftn1	UP-regulated	2
Rgs17	UP-regulated	2
Ripor2	UP-regulated	2
Rmst	UP-regulated	2
Rnf13	UP-regulated	2
Rnf144a	UP-regulated	2
Rps6ka5	UP-regulated	2
Rps6kc1	UP-regulated	2
Rras2	UP-regulated	2
Rspo2	UP-regulated	2
Ryk	UP-regulated	2
Sacm1l	UP-regulated	2
Sanbr	UP-regulated	2
Satb2	UP-regulated	2
Scaf8	UP-regulated	2
Scai	UP-regulated	2
Scg5	UP-regulated	2
Scube1	UP-regulated	2
Sdccag8	UP-regulated	2
Sdhaf3	UP-regulated	2
Sdk2	UP-regulated	2
Septin6	UP-regulated	2
Sesn1	UP-regulated	2
Sfmbt2	UP-regulated	2
Sgce	UP-regulated	2
Sh3gl3	UP-regulated	2
Shank1	UP-regulated	2
Shoc2	UP-regulated	2
Sidt1	UP-regulated	2
Sik2	UP-regulated	2
Sipa1l2	UP-regulated	2
Slc10a7	UP-regulated	2
Slc16a2	UP-regulated	2
Slc24a4	UP-regulated	2
Slc30a9	UP-regulated	2
Slc9a2	UP-regulated	2
Slco3a1	UP-regulated	2
Slit2	UP-regulated	2
Slx4ip	UP-regulated	2
Smg6	UP-regulated	2
Smurf1	UP-regulated	2
Sncaip	UP-regulated	2
Snrpn	UP-regulated	2
Snx10	UP-regulated	2
Snx27	UP-regulated	2
Spire1	UP-regulated	2
Spopl	UP-regulated	2
Sptbn4	UP-regulated	2
Srgap2	UP-regulated	2
St6gal1	UP-regulated	2
Ston2	UP-regulated	2
Stum	UP-regulated	2
Stx8	UP-regulated	2
Sulf2	UP-regulated	2
Susd6	UP-regulated	2
Syt2	UP-regulated	2
Taf3	UP-regulated	2
Tango2	UP-regulated	2
Tbc1d22a	UP-regulated	2
Tbc1d4	UP-regulated	2
Tesc	UP-regulated	2
Thsd4	UP-regulated	2
Thy1	UP-regulated	2
Tlk2	UP-regulated	2
Tln2	UP-regulated	2
Tmem164	UP-regulated	2
Tmem200a	UP-regulated	2
Tmem63c	UP-regulated	2
Top1	UP-regulated	2
Tox	UP-regulated	2
Tpk1	UP-regulated	2
Trerf1	UP-regulated	2
Trpc4	UP-regulated	2
Ttc13	UP-regulated	2
Tusc3	UP-regulated	2
Ube2k	UP-regulated	2
Ube2ql1	UP-regulated	2
Ube3a	UP-regulated	2
Unc13c	UP-regulated	2
Unc80	UP-regulated	2
Usp34	UP-regulated	2
Vps13c	UP-regulated	2
Vps54	UP-regulated	2
Vps8	UP-regulated	2
Wasf1	UP-regulated	2
Wasf3	UP-regulated	2
Wdr17	UP-regulated	2
Wdr37	UP-regulated	2
Zc3h12b	UP-regulated	2
Zfp277	UP-regulated	2
Zfp521	UP-regulated	2
Zfp609	UP-regulated	2
Zfp654	UP-regulated	2
Zfp704	UP-regulated	2
Zfp831	UP-regulated	2
Zfr	UP-regulated	2
0610040J01Rik	UP-regulated	1
1700094M23Rik	UP-regulated	1
2610203C22Rik	UP-regulated	1
2900026A02Rik	UP-regulated	1
3110082I17Rik	UP-regulated	1
4921539H07Rik	UP-regulated	1
4930420G21Rik	UP-regulated	1
4930467D21Rik	UP-regulated	1
4930544I03Rik	UP-regulated	1
4930570G19Rik	UP-regulated	1
4933412O06Rik	UP-regulated	1
6330411D24Rik	UP-regulated	1
9330111N05Rik	UP-regulated	1
9530036O11Rik	UP-regulated	1
9930021J03Rik	UP-regulated	1
A230001M10Rik	UP-regulated	1
A330015K06Rik	UP-regulated	1
A330049N07Rik	UP-regulated	1
A330102I10Rik	UP-regulated	1
A630036G19Rik	UP-regulated	1
AU020206	UP-regulated	1
AY512915	UP-regulated	1
Aatk	UP-regulated	1
Abca8b	UP-regulated	1
Abcc1	UP-regulated	1
Abcd2	UP-regulated	1
Abi2	UP-regulated	1
Ablim2	UP-regulated	1
Abr	UP-regulated	1
Acbd6	UP-regulated	1
Acot7	UP-regulated	1
Acss2	UP-regulated	1
Actr2	UP-regulated	1
Acvr1c	UP-regulated	1
Adamts20	UP-regulated	1
Adamts6	UP-regulated	1
Adarb1	UP-regulated	1
Adcy1	UP-regulated	1
Adcy3	UP-regulated	1
Adcy5	UP-regulated	1
Adgrb2	UP-regulated	1
Adgrl2	UP-regulated	1
Adipor2	UP-regulated	1
Afdn	UP-regulated	1
Afg1l	UP-regulated	1
Ago3	UP-regulated	1
Ahdc1	UP-regulated	1
Akap9	UP-regulated	1
Alpk1	UP-regulated	1
Anapc15	UP-regulated	1
Ankrd17	UP-regulated	1
Ankrd28	UP-regulated	1
Ankrd42	UP-regulated	1
Anp32a	UP-regulated	1
Antxr1	UP-regulated	1
Anxa3	UP-regulated	1
Ap2b1	UP-regulated	1
Apbb1ip	UP-regulated	1
Arhgap10	UP-regulated	1
Arhgap21	UP-regulated	1
Arhgap25	UP-regulated	1
Arhgap26	UP-regulated	1
Arhgap42	UP-regulated	1
Arhgap6	UP-regulated	1
Arhgef10l	UP-regulated	1
Arhgef26	UP-regulated	1
Arhgef4	UP-regulated	1
Armh3	UP-regulated	1
Asph	UP-regulated	1
Atf2	UP-regulated	1
Atg7	UP-regulated	1
Atosa	UP-regulated	1
Atp10a	UP-regulated	1
Atp13a4	UP-regulated	1
Atp2b3	UP-regulated	1
Atp6v1h	UP-regulated	1
Axl	UP-regulated	1
B230334C09Rik	UP-regulated	1
Bcar3	UP-regulated	1
Bcas1	UP-regulated	1
Bdnf	UP-regulated	1
Bicc1	UP-regulated	1
Blnk	UP-regulated	1
Bmper	UP-regulated	1
Bmpr1b	UP-regulated	1
Borcs5	UP-regulated	1
Braf	UP-regulated	1
Brdt	UP-regulated	1
Bsn	UP-regulated	1
Btbd3	UP-regulated	1
Btrc	UP-regulated	1
C030034L19Rik	UP-regulated	1
C130026L21Rik	UP-regulated	1
Cables1	UP-regulated	1
Cachd1	UP-regulated	1
Cacna1a	UP-regulated	1
Cacna1g	UP-regulated	1
Cacng2	UP-regulated	1
Cacng7	UP-regulated	1
Cacul1	UP-regulated	1
Cadps2	UP-regulated	1
Calcrl	UP-regulated	1
Camk2a	UP-regulated	1
Camk2b	UP-regulated	1
Cbfa2t2	UP-regulated	1
Ccdc171	UP-regulated	1
Ccdc3	UP-regulated	1
Ccdc30	UP-regulated	1
Ccdc6	UP-regulated	1
Ccnd3	UP-regulated	1
Cd180	UP-regulated	1
Cd2ap	UP-regulated	1
Cd300lf	UP-regulated	1
Cd84	UP-regulated	1
Cd9	UP-regulated	1
Cdc42se2	UP-regulated	1
Cdh22	UP-regulated	1
Cdh6	UP-regulated	1
Cdh7	UP-regulated	1
Cdin1	UP-regulated	1
Cdk19	UP-regulated	1
Cdk5rap1	UP-regulated	1
Cdk6	UP-regulated	1
Cdyl	UP-regulated	1
Celf1	UP-regulated	1
Celf6	UP-regulated	1
Cep170	UP-regulated	1
Cfap20dc	UP-regulated	1
Cfh	UP-regulated	1
Chchd6	UP-regulated	1
Chd2	UP-regulated	1
Chd9	UP-regulated	1
Chrm2	UP-regulated	1
Chst8	UP-regulated	1
Clasp1	UP-regulated	1
Clasp2	UP-regulated	1
Cldn14	UP-regulated	1
Clint1	UP-regulated	1
Clip1	UP-regulated	1
Clmn	UP-regulated	1
Clstn1	UP-regulated	1
Cnnm2	UP-regulated	1
Cntln	UP-regulated	1
Cntnap4	UP-regulated	1
Col19a1	UP-regulated	1
Col6a1	UP-regulated	1
Coro2b	UP-regulated	1
Cotl1	UP-regulated	1
Cpa6	UP-regulated	1
Cpeb2	UP-regulated	1
Cpm	UP-regulated	1
Cracd	UP-regulated	1
Cradd	UP-regulated	1
Creb3l2	UP-regulated	1
Crebbp	UP-regulated	1
Crim1	UP-regulated	1
Crtc1	UP-regulated	1
Cryl1	UP-regulated	1
Csf1	UP-regulated	1
Cstpp1	UP-regulated	1
Ctdspl	UP-regulated	1
Ctps2	UP-regulated	1
Cux1	UP-regulated	1
Cyb5b	UP-regulated	1
Cyfip1	UP-regulated	1
Cyfip2	UP-regulated	1
Cyth1	UP-regulated	1
Daam2	UP-regulated	1
Dab2	UP-regulated	1
Dab2ip	UP-regulated	1
Dach1	UP-regulated	1
Dapk1	UP-regulated	1
Ddhd1	UP-regulated	1
Ddx31	UP-regulated	1
Dgkd	UP-regulated	1
Dgkz	UP-regulated	1
Dkk2	UP-regulated	1
Dkk3	UP-regulated	1
Dlx6os1	UP-regulated	1
Dmxl1	UP-regulated	1
Dnajb14	UP-regulated	1
Dnajb4	UP-regulated	1
Dnm1	UP-regulated	1
Dock11	UP-regulated	1
Dock8	UP-regulated	1
Dpy19l1	UP-regulated	1
Dpy19l4	UP-regulated	1
Dtd1	UP-regulated	1
Dusp11	UP-regulated	1
Dync1i2	UP-regulated	1
Dyrk1a	UP-regulated	1
Dzip3	UP-regulated	1
E130308A19Rik	UP-regulated	1
E230029C05Rik	UP-regulated	1
ENSMUSG00000120385	UP-regulated	1
ENSMUSG00000121013	UP-regulated	1
ENSMUSG00000121307	UP-regulated	1
Efr3a	UP-regulated	1
Efr3b	UP-regulated	1
Egfr	UP-regulated	1
Eif4g3	UP-regulated	1
Elapor2	UP-regulated	1
Elavl4	UP-regulated	1
Elf2	UP-regulated	1
Elfn1	UP-regulated	1
Elfn2	UP-regulated	1
Elk3	UP-regulated	1
Emc2	UP-regulated	1
Eml1	UP-regulated	1
Eml5	UP-regulated	1
Enah	UP-regulated	1
Endod1	UP-regulated	1
Enpp2	UP-regulated	1
Ephx4	UP-regulated	1
Eps8	UP-regulated	1
Erbin	UP-regulated	1
Eri3	UP-regulated	1
Erp44	UP-regulated	1
Esr1	UP-regulated	1
Esyt2	UP-regulated	1
Exoc5	UP-regulated	1
Extl3	UP-regulated	1
F630206G17Rik	UP-regulated	1
Fam102b	UP-regulated	1
Fam118b	UP-regulated	1
Fam20c	UP-regulated	1
Fam219a	UP-regulated	1
Far2	UP-regulated	1
Far2os2	UP-regulated	1
Farsb	UP-regulated	1
Fbxo7	UP-regulated	1
Fbxo8	UP-regulated	1
Fbxw4	UP-regulated	1
Fcho2	UP-regulated	1
Fli1	UP-regulated	1
Fnbp1	UP-regulated	1
Fndc3b	UP-regulated	1
Fnip1	UP-regulated	1
Folh1	UP-regulated	1
Frmd3	UP-regulated	1
Fyb	UP-regulated	1
Gab1	UP-regulated	1
Gab3	UP-regulated	1
Gabbr1	UP-regulated	1
Gabra3	UP-regulated	1
Galk2	UP-regulated	1
Galnt3	UP-regulated	1
Gas2	UP-regulated	1
Gcnt2	UP-regulated	1
Gfra1	UP-regulated	1
Ggnbp2	UP-regulated	1
Gigyf2	UP-regulated	1
Gli2	UP-regulated	1
Gli3	UP-regulated	1
Gm11906	UP-regulated	1
Gm12940	UP-regulated	1
Gm1604a	UP-regulated	1
Gm16168	UP-regulated	1
Gm19500	UP-regulated	1
Gm1976	UP-regulated	1
Gm2629	UP-regulated	1
Gm26673	UP-regulated	1
Gm26714	UP-regulated	1
Gm28578	UP-regulated	1
Gm28905	UP-regulated	1
Gm29514	UP-regulated	1
Gm30551	UP-regulated	1
Gm31907	UP-regulated	1
Gm32442	UP-regulated	1
Gm33524	UP-regulated	1
Gm34567	UP-regulated	1
Gm37168	UP-regulated	1
Gm37679	UP-regulated	1
Gm40645	UP-regulated	1
Gm43154	UP-regulated	1
Gm44724	UP-regulated	1
Gm47728	UP-regulated	1
Gm48755	UP-regulated	1
Gm4876	UP-regulated	1
Gm4924	UP-regulated	1
Gm50304	UP-regulated	1
Gm50330	UP-regulated	1
Gm53013	UP-regulated	1
Gm53029	UP-regulated	1
Gm7854	UP-regulated	1
Gm8091	UP-regulated	1
Gm816	UP-regulated	1
Gm9895	UP-regulated	1
Gnas	UP-regulated	1
Gnaz	UP-regulated	1
Gnptab	UP-regulated	1
Golm2	UP-regulated	1
Gpam	UP-regulated	1
Gpatch8	UP-regulated	1
Gpd2	UP-regulated	1
Gpr161	UP-regulated	1
Gpr176	UP-regulated	1
Gpr45	UP-regulated	1
Gramd1b	UP-regulated	1
Grin1	UP-regulated	1
Grin3a	UP-regulated	1
Grk3	UP-regulated	1
Gsap	UP-regulated	1
Gulp1	UP-regulated	1
Havcr2	UP-regulated	1
Hcrtr2	UP-regulated	1
Hdac4	UP-regulated	1
Herc3	UP-regulated	1
Hhat	UP-regulated	1
Hif1a	UP-regulated	1
Hnrnpc	UP-regulated	1
Hook3	UP-regulated	1
Hpcal1	UP-regulated	1
Hs3st5	UP-regulated	1
Htr2a	UP-regulated	1
Htra1	UP-regulated	1
Hunk	UP-regulated	1
Ide	UP-regulated	1
Ifitm10	UP-regulated	1
Ift57	UP-regulated	1
Igf1	UP-regulated	1
Igsf9b	UP-regulated	1
Ikzf1	UP-regulated	1
Ikzf2	UP-regulated	1
Il1rapl2	UP-regulated	1
Il33	UP-regulated	1
Ino80	UP-regulated	1
Inpp5d	UP-regulated	1
Insyn2b	UP-regulated	1
Irag1	UP-regulated	1
Irag2	UP-regulated	1
Itga9	UP-regulated	1
Itgbl1	UP-regulated	1
Itpk1	UP-regulated	1
Itpr1	UP-regulated	1
Jade3	UP-regulated	1
Jmy	UP-regulated	1
Jph3	UP-regulated	1
Jpx	UP-regulated	1
Kansl1l	UP-regulated	1
Kat2b	UP-regulated	1
Kcnab2	UP-regulated	1
Kcnb1	UP-regulated	1
Kcnh8	UP-regulated	1
Kcnip3	UP-regulated	1
Kif13a	UP-regulated	1
Kif17	UP-regulated	1
Kif1a	UP-regulated	1
Kif6	UP-regulated	1
Klf8	UP-regulated	1
Klhl6	UP-regulated	1
Klhl7	UP-regulated	1
Klrg1	UP-regulated	1
Kndc1	UP-regulated	1
Kpna3	UP-regulated	1
Lair1	UP-regulated	1
Lamp2	UP-regulated	1
Larp4b	UP-regulated	1
Ldlrad3	UP-regulated	1
Lhfpl2	UP-regulated	1
Lims1	UP-regulated	1
Lin28b	UP-regulated	1
Lmtk2	UP-regulated	1
Lnpep	UP-regulated	1
Lonp2	UP-regulated	1
Lpar1	UP-regulated	1
Lrch3	UP-regulated	1
Lrig2	UP-regulated	1
Lrp12	UP-regulated	1
Lrrc20	UP-regulated	1
Lrrc28	UP-regulated	1
Lrrc3b	UP-regulated	1
Lrrc49	UP-regulated	1
Lrrc8b	UP-regulated	1
Lrrc8d	UP-regulated	1
Lrrk1	UP-regulated	1
Lrrk2	UP-regulated	1
Luzp1	UP-regulated	1
Ly86	UP-regulated	1
Lyn	UP-regulated	1
Macf1	UP-regulated	1
Mad1l1	UP-regulated	1
Maf	UP-regulated	1
Magi3	UP-regulated	1
Mal	UP-regulated	1
Mamld1	UP-regulated	1
Man1a2	UP-regulated	1
Map3k1	UP-regulated	1
Map3k5	UP-regulated	1
Map4	UP-regulated	1
Map4k3	UP-regulated	1
Map7	UP-regulated	1
Mapk8	UP-regulated	1
Mapkap1	UP-regulated	1
Mapre2	UP-regulated	1
Mapt	UP-regulated	1
Marchf3	UP-regulated	1
Mark1	UP-regulated	1
Mboat1	UP-regulated	1
Mdga1	UP-regulated	1
Med14	UP-regulated	1
Memo1	UP-regulated	1
Mertk	UP-regulated	1
Mettl8	UP-regulated	1
Mfap3l	UP-regulated	1
Mical2	UP-regulated	1
Micu3	UP-regulated	1
Mid1	UP-regulated	1
Miga1	UP-regulated	1
Mir124a-1hg	UP-regulated	1
Mkln1	UP-regulated	1
Mmp24	UP-regulated	1
Mob3b	UP-regulated	1
Mobp	UP-regulated	1
Morrbid	UP-regulated	1
Mpdz	UP-regulated	1
Mpp7	UP-regulated	1
Mras	UP-regulated	1
Mrc2	UP-regulated	1
Mrtfa	UP-regulated	1
Msi2	UP-regulated	1
Msn	UP-regulated	1
Mta3	UP-regulated	1
Mtcl1	UP-regulated	1
Mthfd1l	UP-regulated	1
Mthfs	UP-regulated	1
Mtm1	UP-regulated	1
Mtmr3	UP-regulated	1
Mtus1	UP-regulated	1
Mylip	UP-regulated	1
Myo1e	UP-regulated	1
Myo1f	UP-regulated	1
Myo5a	UP-regulated	1
Myo9b	UP-regulated	1
Naip2	UP-regulated	1
Nbeal1	UP-regulated	1
Nectin3	UP-regulated	1
Nek7	UP-regulated	1
Nfat5	UP-regulated	1
Nfatc1	UP-regulated	1
Nfix	UP-regulated	1
Nhs	UP-regulated	1
Nhsl1	UP-regulated	1
Nhsl2	UP-regulated	1
Niban1	UP-regulated	1
Nin	UP-regulated	1
Ninj2	UP-regulated	1
Nipbl	UP-regulated	1
Nlrc5	UP-regulated	1
Nos1	UP-regulated	1
Nova2	UP-regulated	1
Npas2	UP-regulated	1
Nphp4	UP-regulated	1
Nr2c2	UP-regulated	1
Nrxn2	UP-regulated	1
Nsd3	UP-regulated	1
Nsdhl	UP-regulated	1
Nt5dc1	UP-regulated	1
Ntng1	UP-regulated	1
Nup93	UP-regulated	1
Nxn	UP-regulated	1
Onecut2	UP-regulated	1
Or5v1b	UP-regulated	1
Orai2	UP-regulated	1
Osbpl3	UP-regulated	1
Osbpl9	UP-regulated	1
P2ry6	UP-regulated	1
P4ha1	UP-regulated	1
Pag1	UP-regulated	1
Palld	UP-regulated	1
Parg	UP-regulated	1
Parm1	UP-regulated	1
Parn	UP-regulated	1
Pcdh17	UP-regulated	1
Pcsk1	UP-regulated	1
Pdcd4	UP-regulated	1
Pde1c	UP-regulated	1
Pde3a	UP-regulated	1
Pde4a	UP-regulated	1
Pde8a	UP-regulated	1
Pdgfd	UP-regulated	1
Pdzrn4	UP-regulated	1
Peli1	UP-regulated	1
Peli2	UP-regulated	1
Pgbd5	UP-regulated	1
Phactr2	UP-regulated	1
Phf24	UP-regulated	1
Pi4ka	UP-regulated	1
Picalm	UP-regulated	1
Pign	UP-regulated	1
Pik3ca	UP-regulated	1
Pik3r1	UP-regulated	1
Pkn2	UP-regulated	1
Pknox2	UP-regulated	1
Pkp2	UP-regulated	1
Pla2g4e	UP-regulated	1
Plcg2	UP-regulated	1
Plcxd3	UP-regulated	1
Pld1	UP-regulated	1
Plek	UP-regulated	1
Plekhh2	UP-regulated	1
Plekhm3	UP-regulated	1
Pmp22	UP-regulated	1
Pnpla7	UP-regulated	1
Pola1	UP-regulated	1
Ppard	UP-regulated	1
Pparg	UP-regulated	1
Ppp1r16b	UP-regulated	1
Ppp3cc	UP-regulated	1
Ppp4r4	UP-regulated	1
Prex1	UP-regulated	1
Prex2	UP-regulated	1
Prkcg	UP-regulated	1
Prkch	UP-regulated	1
Pros1	UP-regulated	1
Prr5l	UP-regulated	1
Psme4	UP-regulated	1
Pstpip2	UP-regulated	1
Ptbp2	UP-regulated	1
Ptchd1	UP-regulated	1
Ptn	UP-regulated	1
Ptpn12	UP-regulated	1
Ptpn5	UP-regulated	1
Ptprc	UP-regulated	1
Ptprj	UP-regulated	1
Ptprs	UP-regulated	1
Ptprz1	UP-regulated	1
R3hdm1	UP-regulated	1
Rab10	UP-regulated	1
Rab31	UP-regulated	1
Rab8b	UP-regulated	1
Rabgap1	UP-regulated	1
Rad51b	UP-regulated	1
Rai1	UP-regulated	1
Rai14	UP-regulated	1
Rai2	UP-regulated	1
Rala	UP-regulated	1
Ralgapa1	UP-regulated	1
Rap1a	UP-regulated	1
Raph1	UP-regulated	1
Rasa3	UP-regulated	1
Rasgrp3	UP-regulated	1
Rassf3	UP-regulated	1
Rassf8	UP-regulated	1
Raver2	UP-regulated	1
Rbm47	UP-regulated	1
Rcor1	UP-regulated	1
Rerg	UP-regulated	1
Rgs20	UP-regulated	1
Rgs8	UP-regulated	1
Rhoj	UP-regulated	1
Ric8b	UP-regulated	1
Rin2	UP-regulated	1
Rnf217	UP-regulated	1
Rnf220	UP-regulated	1
Rorb	UP-regulated	1
Rreb1	UP-regulated	1
Rtn4r	UP-regulated	1
Rttn	UP-regulated	1
Rufy3	UP-regulated	1
Runx1	UP-regulated	1
Rxfp1	UP-regulated	1
Samd4	UP-regulated	1
Samsn1	UP-regulated	1
Sarnp	UP-regulated	1
Scmh1	UP-regulated	1
Scn3a	UP-regulated	1
Sec24d	UP-regulated	1
Sel1l3	UP-regulated	1
Sema3d	UP-regulated	1
Sema6a	UP-regulated	1
Septin7	UP-regulated	1
Serinc2	UP-regulated	1
Serpine2	UP-regulated	1
Setd3	UP-regulated	1
Sgk3	UP-regulated	1
Sgsm1	UP-regulated	1
Sh3bp2	UP-regulated	1
Sh3pxd2b	UP-regulated	1
Shprh	UP-regulated	1
Shroom2	UP-regulated	1
Shroom3	UP-regulated	1
Shroom4	UP-regulated	1
Sirpa	UP-regulated	1
[truncated: 589 more rows]
