# Supplementary material for: snCED-seq: High-fidelity cryogenic enzymatic dissociation of nuclei for single-nucleus RNA-seq of FFPE tissues
Source: Research Square preprint supplement (doi:10.21203/rs.3.rs-5197301/v1), 2024-10-21
Supplement: Supplementary file 2 [file 7b729b247480af3cbbf3bab7.xlsx]

## Sheet: Ast-GO terms
Supplementary Table 3：Astrocytes subclusters enrichment the reported function and pathways associated with AD.
Cluster	ID	Description	GeneRatio	BgRatio	pvalue	p.adjust	qvalue	geneID	Count	type
0	GO:0048017	inositol lipid-mediated signaling	10/236	171/28943	1.54e-06	7.17e-05	5e-05	Angpt1/Egfr/Erbb4/Ntrk2/Pdgfd/Plcb1/Plcb4/Plce1/Plcl1/Prex2	10	Lipoid
0	GO:0045834	positive regulation of lipid metabolic process	6/236	188/28943	0.004561	0.0279294	0.0194772	Erbb4/Gpam/Prkce/Sorbs1/Vav3/Zbtb20	6	Lipoid
1	GO:0048017	inositol lipid-mediated signaling	7/162	171/28943	5.25e-05	0.00150114	0.0011894	Angpt1/Ntrk2/Pdgfd/Plcb4/Plce1/Plcl1/Prex2	7	Lipoid
1	GO:0046834	lipid phosphorylation	2/162	10/28943	0.00136042	0.0185899	0.0147293	Dgkb/Dgki	2	Lipoid
1	GO:0006638	neutral lipid metabolic process	5/162	149/28943	0.00154538	0.0207749	0.0164606	Dgkb/Dgki/Gpam/Plce1/Thrb	5	Lipoid
1	GO:0055088	lipid homeostasis	5/162	177/28943	0.00326237	0.0348219	0.0275905	Cyp7b1/Gpam/Hdac9/Rora/Zbtb20	5	Lipoid
2	GO:0006644	phospholipid metabolic process	83/3021	367/28943	8.01e-12	1.47e-10	8.19e-11	Abca3/Abca8b/Abhd12/Abhd3/Abhd6/Acsl3/Acsl6/Agpat3/Agpat4/Agpat5/Cept1/Chka/Chpt1/Dgkb/Dgkd/Dgkg/Dgkh/Dgki/Dgkz/Efr3b/Erbb4/Etnk1/Far1/Fdft1/Fig4/Gpam/Gpcpd1/Gpld1/Hycc2/Inpp4b/Inpp5a/Inpp5b/Ip6k2/Itpkb/Lclat1/Lpgat1/Lyst/Mboat2/Mecp2/Mtm1/Mtmr1/Mtmr12/Mtmr3/Mtmr7/Ocrl/Pcx/Pi4ka/Pigk/Pik3c2a/Pik3ca/Pik3cb/Pik3r1/Pip4k2a/Pip4p2/Pip5k1a/Pip5k1b/Pitpnc1/Pla2g4e/Pla2g7/Plbd2/Plcb1/Plcg2/Plpp1/Plpp3/P…	83	Lipoid
2	GO:0046839	phospholipid dephosphorylation	20/3021	44/28943	3.25e-09	4.09e-08	2.29e-08	Fig4/Inpp4b/Inpp5a/Inpp5b/Mtm1/Mtmr1/Mtmr12/Mtmr3/Mtmr7/Ocrl/Pip4p2/Plpp1/Plpp3/Plpp4/Plppr1/Plppr4/Plppr5/Pten/Sacm1l/Synj1	20	Lipoid
2	GO:0046486	glycerolipid metabolic process	78/3021	382/28943	5.11e-09	6.26e-08	3.5e-08	Abca3/Abhd12/Abhd2/Abhd3/Abhd6/Acsl3/Acsl6/Agpat5/Cept1/Chka/Chpt1/Dagla/Dgkb/Dgkd/Dgkg/Dgkh/Dgki/Dgkz/Efr3b/Etnk1/Faah/Far1/Fig4/Gk/Gpam/Gpcpd1/Gpld1/Hycc2/Inpp4b/Inpp5a/Inpp5b/Ip6k2/Itpkb/Lclat1/Lmf1/Lpgat1/Lpin2/Mboat2/Mecp2/Mgll/Mtm1/Mtmr1/Mtmr12/Mtmr3/Mtmr7/Ocrl/Pi4ka/Pigk/Pik3c2a/Pik3ca/Pik3cb/Pik3r1/Pip4k2a/Pip4p2/Pip5k1a/Pip5k1b/Pitpnc1/Pla2g4e/Pla2g7/Plcb1/Plce1/Plcg2/Plpp1/Pnpla8/Ptdss1…	78	Lipoid
2	GO:0006650	glycerophospholipid metabolic process	62/3021	277/28943	5.16e-09	6.31e-08	3.52e-08	Abca3/Abhd12/Abhd3/Abhd6/Acsl3/Cept1/Chka/Chpt1/Dgkb/Dgkd/Dgkg/Dgkh/Dgki/Dgkz/Efr3b/Etnk1/Far1/Fig4/Gpam/Gpcpd1/Gpld1/Hycc2/Inpp4b/Inpp5a/Inpp5b/Ip6k2/Itpkb/Lclat1/Lpgat1/Mboat2/Mecp2/Mtm1/Mtmr1/Mtmr12/Mtmr3/Mtmr7/Ocrl/Pi4ka/Pigk/Pik3c2a/Pik3ca/Pik3cb/Pik3r1/Pip4k2a/Pip4p2/Pip5k1a/Pip5k1b/Pitpnc1/Pla2g4e/Pla2g7/Plcb1/Plcg2/Pnpla8/Ptdss1/Pten/Sacm1l/Serinc5/Smg1/Synj1/Ttc7b/Uvrag/Vac14	62	Lipoid
2	GO:0048017	inositol lipid-mediated signaling	44/3021	171/28943	1.11e-08	1.29e-07	7.21e-08	Agap2/Angpt1/Cbl/Dab2ip/Egfr/Erbb4/Fyn/Gab2/Igf1r/Il18/Insr/Irs1/Kcnh1/Myo16/Ncor1/Ncs1/Nedd4/Nf1/Ntrk2/Ntrk3/Nyap2/Ogt/Pdgfd/Pi4ka/Pik3c2a/Pik3ca/Pik3cb/Pik3r1/Pitpnm2/Plcb1/Plcb4/Plce1/Plcl1/Plcl2/Ppard/Ppp1r16b/Prex2/Pten/Ptk2/Rasgrp1/Ror1/Sema4d/Synj1/Ube3a	44	Lipoid
2	GO:0019216	regulation of lipid metabolic process	72/3021	388/28943	9.6e-07	7.66e-06	4.28e-06	Abca3/Abhd6/Acsl3/Adora1/Ambra1/App/Asxl3/Atg7/Bcl11b/Ccdc3/Cdc42/Creb1/Crtc3/Dab2ip/Dgkz/Disp3/Elovl5/Erbb4/Gk/Gpam/Gpld1/Hrh1/Igf1r/Irs1/Kcnma1/Lmf1/Lonp2/Lpgat1/Macroh2a1/Mlycd/Mtmr1/Mtmr3/Mtor/Ncor1/Nfkb1/Nr1d2/Nr3c1/Pcx/Pde3b/Pde8b/Pdk3/Pibf1/Pip4k2a/Plcg2/Por/Ppard/Pparg/Ppargc1a/Ppp2r5a/Prkaa1/Prkaa2/Prkag2/Prkce/Prmt3/Prox1/Ptk2b/Rora/Rptor/Rubcn/Sec14l2/Smpd3/Snca/Sorbs1/Sorl1/Src/Srebf2…	72	Lipoid
2	GO:0008654	phospholipid biosynthetic process	46/3021	223/28943	4.99e-06	3.43e-05	1.92e-05	Abca8b/Acsl3/Acsl6/Agpat3/Agpat4/Agpat5/Cept1/Chka/Chpt1/Dgkb/Dgkd/Dgkg/Dgkh/Dgki/Dgkz/Efr3b/Erbb4/Etnk1/Far1/Gpam/Hycc2/Ip6k2/Itpkb/Lclat1/Lpgat1/Mboat2/Pcx/Pi4ka/Pigk/Pik3c2a/Pik3ca/Pik3cb/Pik3r1/Pip4k2a/Pip5k1a/Pip5k1b/Plcg2/Ppard/Ptdss1/Serinc5/Sgms1/Smg1/Ttc7b/Uvrag/Vac14/Vapa	46	Lipoid
2	GO:0046834	lipid phosphorylation	7/3021	10/28943	1.21e-05	7.63e-05	4.27e-05	Agk/Dgkb/Dgkd/Dgkg/Dgkh/Dgki/Dgkz	7	Lipoid
2	GO:0030258	lipid modification	43/3021	221/28943	4.38e-05	0.000244545	0.000136684	Agk/Auh/B3galt1/Dgkb/Dgkd/Dgkg/Dgkh/Dgki/Dgkz/Fig4/Hsd17b4/Inpp4b/Inpp5a/Inpp5b/Irs1/Lonp2/Mapk14/Mboat2/Mlycd/Mtm1/Mtmr1/Mtmr12/Mtmr3/Mtmr7/Mtor/Ocrl/Pip4p2/Pla2g7/Plpp1/Plpp3/Plpp4/Plppr1/Plppr4/Plppr5/Por/Ppard/Pparg/Ppargc1a/Prkaa1/Pten/Sacm1l/St3gal4/Synj1	43	Lipoid
2	GO:0006665	sphingolipid metabolic process	30/3021	146/28943	0.000220298	0.00101717	0.000568528	Abca8b/Acer3/Agk/Atg7/B3galt1/B4galt5/B4galt6/Cers4/Cers6/Cert1/Crem/Elovl5/Elovl6/Fut9/Galc/Hacd1/Hacd2/Itgb8/Map7/Plpp1/Plpp3/Serinc5/Sgms1/Smpd3/Spns2/St3gal1/St3gal3/St6galnac3/St6galnac5/Vapa	30	Lipoid
2	GO:0045017	glycerolipid biosynthetic process	39/3021	214/28943	0.000394641	0.00168344	0.000940928	Acsl3/Acsl6/Cept1/Chka/Chpt1/Dgkb/Dgkd/Dgkg/Dgkh/Dgki/Dgkz/Efr3b/Etnk1/Far1/Gpam/Gpld1/Hycc2/Ip6k2/Itpkb/Lpgat1/Lpin2/Pi4ka/Pigk/Pik3c2a/Pik3ca/Pik3cb/Pik3r1/Pip4k2a/Pip5k1a/Pip5k1b/Plce1/Plcg2/Plpp1/Ptdss1/Smg1/Tcf7l2/Ttc7b/Uvrag/Vac14	39	Lipoid
2	GO:0045834	positive regulation of lipid metabolic process	35/3021	188/28943	0.000508666	0.00211853	0.00118411	Abhd6/Acsl3/Adora1/Ambra1/App/Ccdc3/Cdc42/Creb1/Dgkz/Disp3/Elovl5/Erbb4/Gpam/Gpld1/Igf1r/Irs1/Lpgat1/Mlycd/Mtor/Pcx/Por/Ppard/Pparg/Ppargc1a/Prkce/Ptk2b/Rptor/Sec14l2/Smpd3/Sorbs1/Src/Srebf2/Tcf7l2/Vav3/Zbtb20	35	Lipoid
2	GO:0046474	glycerophospholipid biosynthetic process	32/3021	168/28943	0.000574453	0.00236377	0.00132119	Acsl3/Cept1/Chka/Chpt1/Dgkb/Dgkd/Dgkg/Dgkh/Dgki/Dgkz/Efr3b/Etnk1/Far1/Gpam/Hycc2/Ip6k2/Itpkb/Pi4ka/Pigk/Pik3c2a/Pik3ca/Pik3cb/Pik3r1/Pip4k2a/Pip5k1a/Pip5k1b/Plcg2/Ptdss1/Smg1/Ttc7b/Uvrag/Vac14	32	Lipoid
2	GO:0045332	phospholipid translocation	14/3021	52/28943	0.000675425	0.0026982	0.00150811	Abca1/Ano3/Ano4/Ano6/Atp11b/Atp11c/Atp8a1/Atp8a2/Atp9a/Atp9b/Trpc5/Xkr4/Xkr6/Xrcc4	14	Lipoid
2	GO:0043550	regulation of lipid kinase activity	14/3021	53/28943	0.00083078	0.00323087	0.00180584	Ambra1/App/Cdc42/Dab2ip/Dgkz/Irs1/Pik3r1/Pip4k2a/Ppp2r5a/Ptk2b/Rb1/Rubcn/Src/Vav3	14	Lipoid
2	GO:0034204	lipid translocation	14/3021	54/28943	0.0010152	0.00386039	0.0021577	Abca1/Ano3/Ano4/Ano6/Atp11b/Atp11c/Atp8a1/Atp8a2/Atp9a/Atp9b/Trpc5/Xkr4/Xkr6/Xrcc4	14	Lipoid
2	GO:0006643	membrane lipid metabolic process	34/3021	188/28943	0.00102877	0.00389995	0.00217981	Abca8b/Acer3/Agk/Agmo/Atg7/B3galt1/B4galt5/B4galt6/Cers4/Cers6/Cert1/Crem/Elovl5/Elovl6/Fut9/Galc/Gpld1/Hacd1/Hacd2/Itgb8/Map7/Pigk/Plpp1/Plpp3/Serinc5/Sgms1/Smpd3/Spns2/St3gal1/St3gal3/St3gal4/St6galnac3/St6galnac5/Vapa	34	Lipoid
2	GO:0030148	sphingolipid biosynthetic process	21/3021	99/28943	0.00119283	0.00444	0.00248166	Abca8b/Acer3/Agk/Atg7/B3galt1/B4galt5/B4galt6/Cers4/Cers6/Elovl5/Elovl6/Fut9/Hacd1/Hacd2/Sgms1/Smpd3/St3gal1/St3gal3/St6galnac3/St6galnac5/Vapa	21	Lipoid
2	GO:0006638	neutral lipid metabolic process	28/3021	149/28943	0.00151381	0.00546961	0.00305714	Abhd12/Abhd2/Abhd6/Acsl6/Agpat5/Dagla/Dgkb/Dgkd/Dgkg/Dgkh/Dgki/Dgkz/Faah/Gk/Gpam/Gpld1/Lmf1/Lpgat1/Lpin2/Mgll/Plce1/Plpp1/Sel1l/Snca/Sorl1/Tbl1xr1/Tcf7l2/Thrb	28	Lipoid
2	GO:0010876	lipid localization	69/3021	470/28943	0.00232967	0.00792937	0.00443199	Abca1/Abca3/Abca5/Abca8b/Abcc4/Acsl3/Acsl6/Acvr1c/Ano3/Ano4/Ano6/Arl8b/Asxl2/Atg2b/Atp11b/Atp11c/Atp8a1/Atp8a2/Atp9a/Atp9b/Bltp1/Cert1/Dennd5b/Eepd1/Esyt2/Fto/Gramd1b/Gulp1/Hdlbp/Itgav/Kdm5b/Ldah/Lrp1/Lrp6/Map2k6/Mfn2/Nrg1/Osbp2/Osbpl10/Osbpl1a/Osbpl6/Osbpl8/Osbpl9/Pip4k2a/Pitpnc1/Pitpnm2/Plppr4/Pnpla8/Ppard/Pparg/Ptch1/Relch/Rps6kb1/Sec24a/Slco1c1/Slco3a1/Spns2/Srebf2/Stra6/Syt7/Tex2/Tmem135/Trp…	69	Lipoid
2	GO:0097035	regulation of membrane lipid distribution	14/3021	59/28943	0.00253092	0.00858591	0.00479895	Abca1/Ano3/Ano4/Ano6/Atp11b/Atp11c/Atp8a1/Atp8a2/Atp9a/Atp9b/Trpc5/Xkr4/Xkr6/Xrcc4	14	Lipoid
2	GO:0015914	phospholipid transport	19/3021	92/28943	0.00275278	0.00921681	0.00515158	Abca1/Abca3/Ano3/Ano4/Ano6/Atp11b/Atp11c/Atp8a1/Atp8a2/Atp9a/Atp9b/Osbpl8/Pitpnc1/Pitpnm2/Trpc5/Vapa/Xkr4/Xkr6/Xrcc4	19	Lipoid
2	GO:0046889	positive regulation of lipid biosynthetic process	21/3021	110/28943	0.00456415	0.0140597	0.00785842	Abhd6/Acsl3/Ccdc3/Creb1/Elovl5/Erbb4/Gpam/Gpld1/Igf1r/Lpgat1/Mtor/Pcx/Por/Ppargc1a/Rptor/Sec14l2/Smpd3/Sorbs1/Srebf2/Tcf7l2/Zbtb20	21	Lipoid
2	GO:0006869	lipid transport	61/3021	419/28943	0.00482252	0.0147744	0.00825787	Abca1/Abca3/Abca5/Abca8b/Abcc4/Acsl3/Acsl6/Ano3/Ano4/Ano6/Arl8b/Atg2b/Atp11b/Atp11c/Atp8a1/Atp8a2/Atp9a/Atp9b/Cert1/Dennd5b/Eepd1/Esyt2/Gramd1b/Gulp1/Hdlbp/Itgav/Kdm5b/Lrp1/Lrp6/Map2k6/Mfn2/Nrg1/Osbp2/Osbpl10/Osbpl1a/Osbpl6/Osbpl8/Osbpl9/Pip4k2a/Pitpnc1/Pitpnm2/Plppr4/Pnpla8/Ppard/Pparg/Ptch1/Relch/Rps6kb1/Sec24a/Slco1c1/Slco3a1/Spns2/Srebf2/Stra6/Syt7/Tex2/Trpc5/Vapa/Xkr4/Xkr6/Xrcc4	61	Lipoid
2	GO:0017121	plasma membrane phospholipid scrambling	7/3021	22/28943	0.00555303	0.0165677	0.00926024	Ano3/Ano4/Ano6/Trpc5/Xkr4/Xkr6/Xrcc4	7	Lipoid
2	GO:0006687	glycosphingolipid metabolic process	12/3021	53/28943	0.00743274	0.0214693	0.0119999	B3galt1/B4galt5/B4galt6/Crem/Fut9/Galc/Itgb8/Map7/St3gal1/St3gal3/St6galnac3/St6galnac5	12	Lipoid
2	GO:0045833	negative regulation of lipid metabolic process	20/3021	108/28943	0.00783826	0.0223387	0.0124858	Adora1/Asxl3/Atg7/Ccdc3/Crtc3/Dab2ip/Gpld1/Hrh1/Ncor1/Nfkb1/Pde3b/Pde8b/Pibf1/Pip4k2a/Ppp2r5a/Prkaa1/Prmt3/Prox1/Rubcn/Sorl1	20	Lipoid
2	GO:0055088	lipid homeostasis	29/3021	177/28943	0.0096195	0.0266852	0.0149153	Abca1/Abca3/Abca5/Acaca/Adck1/Adora1/Atg7/Cert1/Cyp7b1/Gpam/Gramd1b/Hdac9/Il18/Lyst/Map2k1/Med13/Mia2/Ncor1/Nr1d2/Pnpla8/Prkaa1/Prkaa2/Rora/Rtn4/Sec24a/Slc25a46/Srebf2/Thada/Zbtb20	29	Lipoid
2	GO:0046467	membrane lipid biosynthetic process	23/3021	134/28943	0.0115394	0.0312	0.0174387	Abca8b/Acer3/Agk/Atg7/B3galt1/B4galt5/B4galt6/Cers4/Cers6/Elovl5/Elovl6/Fut9/Hacd1/Hacd2/Pigk/Sgms1/Smpd3/St3gal1/St3gal3/St3gal4/St6galnac3/St6galnac5/Vapa	23	Lipoid
2	GO:0006688	glycosphingolipid biosynthetic process	8/3021	31/28943	0.0122394	0.0327304	0.0182941	B3galt1/B4galt5/B4galt6/Fut9/St3gal1/St3gal3/St6galnac3/St6galnac5	8	Lipoid
3	GO:0048017	inositol lipid-mediated signaling	8/363	171/28943	0.00148365	0.0238085	0.0193229	Egfr/Nf1/Ntrk2/Plcb1/Plcb4/Plce1/Plcl1/Prex2	8	Lipoid
0	GO:0042063	gliogenesis	12/236	363/28943	4.81e-05	0.000957449	0.000667699	Atxn1/Cdh2/Cntn1/Dab1/Dmd/Exoc4/Gli3/Nkx2-2os/Nrg1/Ntrk2/Sox5/Sox6	12	Gliogenesis
1	GO:0042063	gliogenesis	7/162	363/28943	0.00447917	0.04168	0.0330244	Cdh2/Cntn1/Dner/Exoc4/Ntrk2/Sox5/Sox6	7	Gliogenesis
2	GO:0042063	gliogenesis	87/3021	363/28943	8.18e-14	1.96e-12	1.1e-12	Abl1/Abl2/Actr3/Adam22/Afdn/App/Arhgef7/Atp1b2/Atxn1/B4galt5/B4galt6/Bin1/Bmerb1/Cdh2/Ckap5/Cntn1/Cntnap2/Creb1/Ctnnb1/Daam2/Dab1/Dab2ip/Dag1/Disc1/Dmd/Dner/Epha4/Epm2a/Exoc4/Fubp1/Gfap/Gli3/Grin1/Lingo1/Lrp1/Lrp6/Lrp8/Map2k1/Mapk1/Mecp2/Mfn2/Miat/Mmp24/Mtor/Nf1/Nf2/Nfib/Nfix/Nrg1/Ntf3/Ntrk2/Ntrk3/Pafah1b1/Pals1/Pard3/Plec/Plpp3/Pparg/Ppp3r1/Psen1/Pten/Ptk2/Ptn/Ptpra/Ptprj/Ptprz1/Rb1/Rras2/Rtn4/S…	87	Gliogenesis
2	GO:0014013	regulation of gliogenesis	28/3021	135/28943	0.000298606	0.00132992	0.000743335	Actr3/Atxn1/Bin1/Ctnnb1/Daam2/Dab1/Dag1/Gfap/Lingo1/Mecp2/Mfn2/Mtor/Nf1/Nf2/Nrg1/Ntf3/Ntrk3/Pparg/Ptk2/Ptn/Ptpra/Ptprz1/Rb1/Rtn4/Ski/Synj1/Tenm4/Zcchc24	28	Gliogenesis
2	GO:0014015	positive regulation of gliogenesis	17/3021	86/28943	0.00707753	0.0205395	0.0114802	Actr3/Atxn1/Bin1/Dag1/Gfap/Mecp2/Mtor/Nrg1/Ntf3/Pparg/Ptk2/Ptn/Ptpra/Ptprz1/Rtn4/Synj1/Tenm4	17	Gliogenesis
2	GO:0014014	negative regulation of gliogenesis	12/3021	58/28943	0.015282	0.0392003	0.0219104	Ctnnb1/Daam2/Dab1/Lingo1/Mecp2/Mfn2/Nf1/Nf2/Ntrk3/Ptn/Rb1/Ski	12	Gliogenesis
3	GO:0042063	gliogenesis	13/363	363/28943	0.000740731	0.0150779	0.0122372	Atxn1/Cdh2/Dab1/Exoc4/Ezh2/Mapk1/Nf1/Nfib/Ntrk2/Pafah1b1/Sox5/Sox6/Wasf3	13	Gliogenesis
0	GO:0048259	regulation of receptor-mediated endocytosis	5/236	125/28943	0.00366804	0.0239651	0.0167126	Angpt1/Magi2/Nrg1/Prkca/Tbc1d5	5	Endocytosis
0	GO:0006898	receptor-mediated endocytosis	7/236	274/28943	0.00747392	0.038625	0.026936	Angpt1/Gria1/Gria2/Magi2/Nrg1/Prkca/Tbc1d5	7	Endocytosis
2	GO:0030100	regulation of endocytosis	88/3021	236/28943	5.56e-28	6.99e-26	3.91e-26	Aak1/Actn4/Add1/Ahi1/Amph/Angpt1/Ankfy1/Ano6/Ap2b1/App/Appl1/Arhgap21/Arrb1/Atxn2/Axl/Bcl2l1/Bicd1/Bin1/Bmp2k/Btbd9/Cbl/Cd2ap/Cdc42/Cdh13/Ckap5/Dgkd/Dlg4/Dnajc6/Dnm1/Dnm1l/Dnm2/Eef2k/Epha3/Epn2/Gsg1l/Hip1/Insr/Iqsec1/Itgav/Itsn1/Lrp1/Lrrk2/Magi2/Mctp1/Mib1/Mkln1/Napb/Nedd4/Nlgn1/Nrg1/Nsf/Ntf3/Numb/Ophn1/Pacsin1/Pacsin2/Pard3/Picalm/Plcg2/Pparg/Ppp3ca/Ppp3cb/Ppp3cc/Ppp3r1/Prkca/Pten/Ptpn5/Rab31/Ri…	88	Endocytosis
2	GO:0006898	receptor-mediated endocytosis	83/3021	274/28943	9.92e-20	5.32e-18	2.97e-18	Aak1/Ahi1/Angpt1/Ap1g1/Ap2a2/Ap2b1/Ap4e1/App/Arrb1/Atxn2/AU040320/Bicd1/Bmp2k/Cacng2/Cacng3/Cacng7/Cacng8/Cbl/Cd2ap/Cltc/Dgkd/Dlg4/Dnajc13/Dnajc6/Dnm1/Dnm2/Dnm3/Eps15/Fcho2/Fchsd2/Gak/Gpr107/Grb2/Gria1/Gria2/Grk3/Gsg1l/Hip1/Insr/Iqsec1/Itgav/Itsn1/Itsn2/Ldlrad3/Lmbrd1/Lrp1/Lrp6/Magi2/Mkln1/Myo6/Napb/Nedd4/Nrg1/Nsf/Ntf3/Numb/Ophn1/Pacsin1/Pard3/Picalm/Plcg2/Ppp3r1/Prkca/Ptpn5/Rab31/Ramp1/Reps1/Sgi…	83	Endocytosis
2	GO:0048488	synaptic vesicle endocytosis	37/3021	74/28943	1.39e-17	5.61e-16	3.14e-16	Amph/Ap2b1/Ap3s1/Bcl2l1/Bin1/Bltp1/Btbd9/Cltc/Dennd1a/Dnajc6/Dnm1/Dnm1l/Dnm2/Dnm3/Fcho2/Itsn1/Itsn2/Lrrk2/Napb/Nlgn1/Ophn1/Pacsin1/Picalm/Ppp3cb/Ppp3cc/Rab27b/Rock1/Sh3gl2/Sh3gl3/Slc17a7/Snap91/Snca/Ston2/Synj1/Syt1/Syt11/Syt7	37	Endocytosis
2	GO:0140238	presynaptic endocytosis	37/3021	74/28943	1.39e-17	5.61e-16	3.14e-16	Amph/Ap2b1/Ap3s1/Bcl2l1/Bin1/Bltp1/Btbd9/Cltc/Dennd1a/Dnajc6/Dnm1/Dnm1l/Dnm2/Dnm3/Fcho2/Itsn1/Itsn2/Lrrk2/Napb/Nlgn1/Ophn1/Pacsin1/Picalm/Ppp3cb/Ppp3cc/Rab27b/Rock1/Sh3gl2/Sh3gl3/Slc17a7/Snap91/Snca/Ston2/Synj1/Syt1/Syt11/Syt7	37	Endocytosis
2	GO:0048259	regulation of receptor-mediated endocytosis	45/3021	125/28943	2.32e-14	6.07e-13	3.4e-13	Aak1/Ahi1/Angpt1/App/Arrb1/Atxn2/Bicd1/Bmp2k/Cbl/Cd2ap/Dgkd/Dlg4/Dnajc6/Dnm2/Gsg1l/Hip1/Insr/Iqsec1/Itgav/Magi2/Mkln1/Napb/Nedd4/Nrg1/Nsf/Ntf3/Numb/Ophn1/Pacsin1/Pard3/Picalm/Plcg2/Ppp3r1/Prkca/Ptpn5/Sh3gl2/Sh3gl3/Smap1/Snap91/Synj1/Syt11/Tbc1d5/Tnk2/Usp46/Wasl	45	Endocytosis
2	GO:0045807	positive regulation of endocytosis	45/3021	127/28943	4.53e-14	1.15e-12	6.42e-13	Actn4/Add1/Ahi1/Amph/Angpt1/Ankfy1/Ano6/Ap2b1/App/Appl1/Arrb1/Axl/Bcl2l1/Bicd1/Bin1/Cbl/Cdc42/Ckap5/Dgkd/Dnm1/Dnm1l/Dnm2/Eef2k/Hip1/Insr/Itsn1/Lrp1/Lrrk2/Magi2/Mib1/Nlgn1/Ntf3/Pard3/Picalm/Plcg2/Pparg/Ppp3ca/Ppp3cc/Ptpn5/Rab31/Snap91/Snca/Synj1/Tbc1d5/Wasl	45	Endocytosis
2	GO:0072583	clathrin-dependent endocytosis	25/3021	45/28943	1.04e-13	2.47e-12	1.38e-12	Aak1/Ap2a2/Ap2b1/Bmp2k/Cltc/Dgkd/Dnajc6/Dnm2/Fcho2/Fchsd2/Gak/Gpr107/Hip1/Itsn1/Itsn2/Lmbrd1/Picalm/Sgip1/Sh3gl2/Sh3gl3/Smap1/Snap91/Syt11/Tnk2/Wasl	25	Endocytosis
2	GO:1900242	regulation of synaptic vesicle endocytosis	14/3021	22/28943	2.51e-09	3.23e-08	1.81e-08	Bcl2l1/Btbd9/Dnm1/Dnm1l/Lrrk2/Nlgn1/Picalm/Ppp3cb/Ppp3cc/Rock1/Slc17a7/Snap91/Syt11/Syt7	14	Endocytosis
2	GO:2000369	regulation of clathrin-dependent endocytosis	12/3021	18/28943	1.66e-08	1.87e-07	1.05e-07	Aak1/Bmp2k/Dgkd/Dnajc6/Dnm2/Sh3gl2/Sh3gl3/Smap1/Snap91/Syt11/Tnk2/Wasl	12	Endocytosis
2	GO:0140239	postsynaptic endocytosis	14/3021	31/28943	8.35e-07	6.7e-06	3.74e-06	Ap2a2/Ap2b1/Dnm3/Gsg1l/Iqsec1/Myo6/Nedd4/Nrg1/Numb/Ophn1/Pacsin1/Ppp3r1/Synj1/Usp46	14	Endocytosis
2	GO:1900244	positive regulation of synaptic vesicle endocytosis	8/3021	12/28943	4.69e-06	3.25e-05	1.82e-05	Bcl2l1/Dnm1/Dnm1l/Lrrk2/Nlgn1/Picalm/Ppp3cc/Snap91	8	Endocytosis
2	GO:0048260	positive regulation of receptor-mediated endocytosis	18/3021	62/28943	4.15e-05	0.000232934	0.000130195	Ahi1/Angpt1/App/Arrb1/Bicd1/Cbl/Dgkd/Dnm2/Hip1/Insr/Magi2/Ntf3/Pard3/Plcg2/Ptpn5/Synj1/Tbc1d5/Wasl	18	Endocytosis
2	GO:0045806	negative regulation of endocytosis	13/3021	50/28943	0.00147612	0.00536801	0.00300036	Atxn2/Dlg4/Epha3/Itgav/Mctp1/Pacsin1/Pacsin2/Picalm/Pten/Rubcn/Sh3gl3/Snph/Syt11	13	Endocytosis
0	GO:0007249	I-kappaB kinase/NF-kappaB signaling	8/236	230/28943	0.000633018	0.00696096	0.00485439	Angpt1/Eda/Erc1/Otud7a/Prkce/Prkd1/Prkn/Rora	8	NFκB
0	GO:0043122	regulation of I-kappaB kinase/NF-kappaB signaling	7/236	191/28943	0.00101549	0.0099729	0.00695483	Angpt1/Eda/Otud7a/Prkce/Prkd1/Prkn/Rora	7	NFκB
0	GO:0033173	calcineurin-NFAT signaling cascade	3/236	49/28943	0.00748258	0.038625	0.026936	Akap6/Nrg1/Rcan2	3	NFκB
1	GO:0007249	I-kappaB kinase/NF-kappaB signaling	7/162	230/28943	0.000328241	0.00637761	0.00505318	Angpt1/Eda/Erc1/Otud7a/Prkd1/Prkn/Rora	7	NFκB
1	GO:0043122	regulation of I-kappaB kinase/NF-kappaB signaling	6/162	191/28943	0.000745039	0.0116535	0.00923345	Angpt1/Eda/Otud7a/Prkd1/Prkn/Rora	6	NFκB
2	GO:0033173	calcineurin-NFAT signaling cascade	17/3021	49/28943	4.84e-06	3.34e-05	1.87e-05	Adgrb2/Akap6/Atp2b4/Camta1/Gsk3b/Homer2/Mtor/Nfat5/Nrg1/Plcg2/Ppp3ca/Ppp3cb/Ppp3cc/Ppp3r1/Rcan1/Rcan2/Sppl3	17	NFκB
2	GO:0070884	regulation of calcineurin-NFAT signaling cascade	15/3021	43/28943	1.61e-05	9.92e-05	5.55e-05	Akap6/Atp2b4/Camta1/Gsk3b/Homer2/Mtor/Nfat5/Nrg1/Plcg2/Ppp3ca/Ppp3cb/Ppp3cc/Ppp3r1/Rcan1/Sppl3	15	NFκB
2	GO:1901224	positive regulation of NIK/NF-kappaB signaling	18/3021	69/28943	0.000189726	0.00088565	0.000495019	Actn4/Ago1/Ago3/App/Crebbp/Eda/Egfr/Ep300/Il18/Lims1/Nfat5/Nr3c2/Pdcd4/Rc3h1/Rc3h2/Sash1/Smpd3/Trim44	18	NFκB
2	GO:0070886	positive regulation of calcineurin-NFAT signaling cascade	8/3021	21/28943	0.00081282	0.00317103	0.00177239	Akap6/Camta1/Nrg1/Ppp3ca/Ppp3cb/Ppp3cc/Ppp3r1/Sppl3	8	NFκB
2	GO:1901222	regulation of NIK/NF-kappaB signaling	21/3021	98/28943	0.00104044	0.00393451	0.00219913	Actn4/Ago1/Ago3/App/Crebbp/Eda/Egfr/Ep300/Fbxw11/Hdac7/Il18/Lims1/Nfat5/Nr3c2/Pdcd4/Ppm1b/Rc3h1/Rc3h2/Sash1/Smpd3/Trim44	21	NFκB
2	GO:0007249	I-kappaB kinase/NF-kappaB signaling	38/3021	230/28943	0.00295981	0.00973027	0.00543857	Abl1/Abl2/Akap13/Alpk1/Angpt1/Ankrd17/Ash1l/Brd4/Btrc/Ctnnb1/Dab2ip/Eda/Erc1/Fyn/Gprc5b/Lurap1l/Mid2/Mtdh/Myo18a/Otud7a/Peli1/Plcg2/Ppm1b/Prkcb/Prkce/Prkd1/Prkn/Rock1/Rock2/Ror1/Rora/Sirpa/Tab2/Tank/Tle1/Tnfrsf19/Usp25/Zmynd11	38	NFκB
2	GO:0043122	regulation of I-kappaB kinase/NF-kappaB signaling	32/3021	191/28943	0.00486176	0.0148872	0.00832094	Abl1/Abl2/Akap13/Alpk1/Angpt1/Ankrd17/Ash1l/Brd4/Btrc/Ctnnb1/Dab2ip/Eda/Fyn/Gprc5b/Lurap1l/Mid2/Mtdh/Otud7a/Peli1/Plcg2/Ppm1b/Prkcb/Prkce/Prkd1/Prkn/Ror1/Rora/Tab2/Tank/Tle1/Tnfrsf19/Zmynd11	32	NFκB
2	GO:0038061	NIK/NF-kappaB signaling	21/3021	118/28943	0.0103079	0.0283145	0.0158259	Actn4/Ago1/Ago3/App/Crebbp/Eda/Egfr/Ep300/Fbxw11/Hdac7/Il18/Lims1/Nfat5/Nr3c2/Pdcd4/Ppm1b/Rc3h1/Rc3h2/Sash1/Smpd3/Trim44	21	NFκB
2	GO:0042982	amyloid precursor protein metabolic process	25/3021	74/28943	5.58e-08	5.61e-07	3.14e-07	Aatf/Adam10/Ago2/App/Bin1/Chrna7/Dlg1/Dyrk1a/Epha4/Gsap/Itm2b/Lrrtm3/Ntrk2/Picalm/Psen1/Ranbp9/Rock1/Rock2/Rtn1/Rtn3/Rtn4/Slc2a13/Sorl1/Spon1/Unc13a	25	Amyloid protein
2	GO:1902991	regulation of amyloid precursor protein catabolic process	18/3021	44/28943	1.46e-07	1.36e-06	7.58e-07	App/Bin1/Chrna7/Epha4/Gsap/Lrrtm3/Ntrk2/Picalm/Ranbp9/Rock1/Rock2/Rtn1/Rtn3/Rtn4/Slc2a13/Sorl1/Spon1/Unc13a	18	Amyloid protein
2	GO:0042987	amyloid precursor protein catabolic process	21/3021	59/28943	2.32e-07	2.09e-06	1.17e-06	Adam10/App/Bin1/Chrna7/Dyrk1a/Epha4/Gsap/Lrrtm3/Ntrk2/Picalm/Psen1/Ranbp9/Rock1/Rock2/Rtn1/Rtn3/Rtn4/Slc2a13/Sorl1/Spon1/Unc13a	21	Amyloid protein
2	GO:0034205	amyloid-beta formation	18/3021	47/28943	4.75e-07	4.02e-06	2.25e-06	Adam10/Bin1/Chrna7/Dyrk1a/Epha4/Gsap/Lrrtm3/Ntrk2/Picalm/Psen1/Rock1/Rock2/Rtn1/Rtn3/Rtn4/Slc2a13/Sorl1/Spon1	18	Amyloid protein
2	GO:0050435	amyloid-beta metabolic process	21/3021	63/28943	8.17e-07	6.58e-06	3.68e-06	Adam10/Bin1/Chrna7/Dyrk1a/Epha4/Gsap/Ide/Lrrtm3/Mgat3/Ntrk2/Picalm/Psen1/Rock1/Rock2/Rtn1/Rtn3/Rtn4/Slc2a13/Sorl1/Spon1/Unc13a	21	Amyloid protein
2	GO:1902003	regulation of amyloid-beta formation	15/3021	37/28943	1.83e-06	1.38e-05	7.71e-06	Bin1/Chrna7/Epha4/Gsap/Lrrtm3/Ntrk2/Picalm/Rock1/Rock2/Rtn1/Rtn3/Rtn4/Slc2a13/Sorl1/Spon1	15	Amyloid protein
2	GO:1904645	response to amyloid-beta	13/3021	39/28943	0.000100862	0.000503411	0.000281373	App/Atp1a3/Cacna1a/Cacna1b/Cacna2d1/Chrna7/Epha4/Fyn/Grm5/Gsk3b/Igf1r/Lrp1/Psen1	13	Amyloid protein
2	GO:1902993	positive regulation of amyloid precursor protein catabolic process	10/3021	25/28943	0.000112585	0.000556515	0.000311055	App/Chrna7/Epha4/Gsap/Lrrtm3/Picalm/Ranbp9/Rock2/Slc2a13/Spon1	10	Amyloid protein
2	GO:1902992	negative regulation of amyloid precursor protein catabolic process	9/3021	22/28943	0.000203194	0.00094243	0.000526755	Bin1/Ntrk2/Picalm/Rock1/Rtn1/Rtn3/Rtn4/Sorl1/Spon1	9	Amyloid protein
2	GO:1904646	cellular response to amyloid-beta	11/3021	33/28943	0.000342746	0.00149518	0.000835704	App/Atp1a3/Cacna1a/Cacna2d1/Epha4/Fyn/Grm5/Gsk3b/Igf1r/Lrp1/Psen1	11	Amyloid protein
2	GO:1902430	negative regulation of amyloid-beta formation	8/3021	19/28943	0.000365469	0.00158088	0.000883605	Bin1/Ntrk2/Rock1/Rtn1/Rtn3/Rtn4/Sorl1/Spon1	8	Amyloid protein
2	GO:1902959	regulation of aspartic-type endopeptidase activity involved in amyloid precursor protein catabolic process	6/3021	11/28943	0.000373323	0.00160404	0.000896554	App/Bin1/Epha4/Picalm/Rock2/Sorl1	6	Amyloid protein
2	GO:1902004	positive regulation of amyloid-beta formation	7/3021	19/28943	0.00217063	0.00743321	0.00415467	Chrna7/Epha4/Gsap/Lrrtm3/Picalm/Rock2/Slc2a13	7	Amyloid protein
3	GO:0042987	amyloid precursor protein catabolic process	6/363	59/28943	9.61e-05	0.00299933	0.00243425	Adam10/Gsap/Ntrk2/Ranbp9/Rtn3/Slc2a13	6	Amyloid protein
3	GO:1902991	regulation of amyloid precursor protein catabolic process	5/363	44/28943	0.000219376	0.00566806	0.00460018	Gsap/Ntrk2/Ranbp9/Rtn3/Slc2a13	5	Amyloid protein
3	GO:0034205	amyloid-beta formation	5/363	47/28943	0.00030048	0.00719883	0.00584255	Adam10/Gsap/Ntrk2/Rtn3/Slc2a13	5	Amyloid protein
3	GO:0042982	amyloid precursor protein metabolic process	6/363	74/28943	0.000337536	0.00786505	0.00638325	Adam10/Gsap/Ntrk2/Ranbp9/Rtn3/Slc2a13	6	Amyloid protein
3	GO:1902003	regulation of amyloid-beta formation	4/363	37/28943	0.00115919	0.0202946	0.0164711	Gsap/Ntrk2/Rtn3/Slc2a13	4	Amyloid protein
3	GO:0050435	amyloid-beta metabolic process	5/363	63/28943	0.00116924	0.0202946	0.0164711	Adam10/Gsap/Ntrk2/Rtn3/Slc2a13	5	Amyloid protein
3	GO:1902993	positive regulation of amyloid precursor protein catabolic process	3/363	25/28943	0.00366676	0.0454462	0.036884	Gsap/Ranbp9/Slc2a13	3	Amyloid protein
0	GO:1902904	negative regulation of supramolecular fiber organization	7/236	179/28943	0.000694612	0.00748025	0.00521652	Add3/Carmil1/Ctnna2/Fgf13/Map2/Mid1/Prkn	7	Bone fibres
0	GO:0048742	regulation of skeletal muscle fiber development	2/236	13/28943	0.00486706	0.0290186	0.0202368	Bcl2/Hdac9	2	Bone fibres
0	GO:1902903	regulation of supramolecular fiber organization	9/236	389/28943	0.00486895	0.0290186	0.0202368	Add3/Carmil1/Ctnna2/Fgf13/Map2/Mid1/Prkce/Prkn/Slc39a12	9	Bone fibres
1	GO:1902904	negative regulation of supramolecular fiber organization	5/162	179/28943	0.00342256	0.0358454	0.0284014	Arhgap6/Ctnna2/Fgf13/Map2/Prkn	5	Bone fibres
2	GO:1902903	regulation of supramolecular fiber organization	131/3021	389/28943	1.24e-35	2.93e-33	1.64e-33	Abi2/Abl1/Actr3/Add1/Add2/Add3/Akap13/Akap9/Apc/App/Arfgef1/Arhgap35/Arhgap6/Arhgef10l/Arhgef18/Arhgef7/Atxn7/Baiap2/Bin1/Bmerb1/Braf/Camsap2/Capza2/Capzb/Carmil1/Ccdc88a/Cd47/Cdc42/Cdk5rap2/Chrna7/Ckap5/Clasp1/Clasp2/Clip1/Coro2b/Cotl1/Cracd/Ctnna2/Cyfip1/Cyfip2/Cyria/Cyrib/Daam2/Dlg1/Dmtn/Dyrk1a/Eml4/Eps8/Evl/Fchsd2/Fer/Fermt2/Fgf13/Fmn1/Gda/Grb2/Hdgfl3/Kank1/Lats1/Limch1/Map1b/Map2/Mapk8/Mapre…	131	Bone fibres
2	GO:1902905	positive regulation of supramolecular fiber organization	65/3021	180/28943	3.56e-20	2.05e-18	1.15e-18	Abi2/Abl1/Actr3/Akap9/Apc/App/Arhgef10l/Baiap2/Bin1/Braf/Carmil1/Ccdc88a/Cd47/Cdc42/Cdk5rap2/Ckap5/Clip1/Cracd/Cyfip1/Dlg1/Evl/Fchsd2/Fer/Fermt2/Fmn1/Gda/Grb2/Limch1/Map1b/Mapk8/Mapt/Mecp2/Mtor/Mtss1/Nav3/Nck1/Nck2/Nckap1/Nf2/Nrp1/Numa1/Pak1/Pde4dip/Ppm1e/Ppm1f/Prkce/Prox1/Psen1/Ptk2b/Rb1/Rictor/Rock2/Sema5a/Sh3pxd2b/Slain1/Slain2/Smad3/Synpo2/Tenm1/Tgfbr1/Togaram1/Tpm1/Wasf1/Wasf3/Wasl	65	Bone fibres
2	GO:1902904	negative regulation of supramolecular fiber organization	59/3021	179/28943	2.62e-16	9.27e-15	5.18e-15	Add1/Add2/Add3/Apc/Arfgef1/Arhgap6/Arhgef18/Arhgef7/Atxn7/Bmerb1/Camsap2/Capza2/Capzb/Carmil1/Clasp1/Clasp2/Coro2b/Cracd/Ctnna2/Cyrib/Dmtn/Dyrk1a/Eml4/Eps8/Evl/Fgf13/Hdgfl3/Kank1/Map1b/Map2/Mfn2/Mid1/Nav3/Pik3ca/Pik3r1/Ppfia1/Ppp1r9a/Prkn/Sgk1/Shank1/Shank3/Shroom2/Slit2/Smad4/Snca/Specc1l/Sptan1/Sptb/Sptbn1/Ssh2/Svil/Taok1/Tbcd/Tjp1/Tmeff2/Tmod1/Tmod2/Tpm1/Wdr47	59	Bone fibres
2	GO:0043149	stress fiber assembly	39/3021	116/28943	1.41e-11	2.49e-10	1.39e-10	Abl1/Arhgap6/Arhgef10l/Arhgef18/Arrb1/Braf/Carmil1/Ccdc88a/Cd47/Cdc42/Clasp1/Clasp2/Coro2b/Cul3/Evl/Fam171a1/Fermt2/Limch1/Mtor/Nf2/Nrp1/Pak1/Phactr1/Pik3r1/Ppfia1/Ppm1e/Ppm1f/Ppp1r9a/Ptk2b/Rock2/Sh3pxd2b/Smad3/Sorbs1/Src/Tgfbr1/Tjp1/Tmeff2/Tpm1/Ttc8	39	Bone fibres
2	GO:0051492	regulation of stress fiber assembly	32/3021	99/28943	2.85e-09	3.62e-08	2.02e-08	Abl1/Arhgap6/Arhgef10l/Arhgef18/Braf/Carmil1/Ccdc88a/Cd47/Cdc42/Clasp1/Clasp2/Coro2b/Evl/Fermt2/Limch1/Mtor/Nf2/Nrp1/Pak1/Pik3r1/Ppfia1/Ppm1e/Ppm1f/Ppp1r9a/Rock2/Sh3pxd2b/Smad3/Tgfbr1/Tjp1/Tmeff2/Tpm1/Ttc8	32	Bone fibres
2	GO:0051496	positive regulation of stress fiber assembly	21/3021	58/28943	1.66e-07	1.53e-06	8.56e-07	Abl1/Arhgef10l/Braf/Carmil1/Ccdc88a/Cd47/Cdc42/Evl/Fermt2/Limch1/Mtor/Nf2/Nrp1/Pak1/Ppm1e/Ppm1f/Rock2/Sh3pxd2b/Smad3/Tgfbr1/Tpm1	21	Bone fibres
2	GO:0070306	lens fiber cell differentiation	13/3021	37/28943	5.4e-05	0.000291354	0.000162847	Abi2/Fgfr2/Frs2/Nf2/Ntrk3/Prox1/Smad3/Smarca4/Spred1/Spred2/Tdrd7/Tmod1/Zeb2	13	Bone fibres
2	GO:0048741	skeletal muscle fiber development	15/3021	48/28943	7.02e-05	0.000366429	0.000204809	Bcl2/Cntnap2/Dner/Hdac4/Hdac5/Hdac9/Homer1/Lncpint/Naca/Plec/Ppp3ca/Ppp3cb/Rcan1/Ripor2/Ski	15	Bone fibres
2	GO:0051497	negative regulation of stress fiber assembly	10/3021	34/28943	0.00187857	0.00661684	0.00369837	Arhgap6/Arhgef18/Clasp1/Clasp2/Coro2b/Pik3r1/Ppfia1/Ppp1r9a/Tjp1/Tmeff2	10	Bone fibres
2	GO:0070307	lens fiber cell development	6/3021	15/28943	0.00279692	0.00926396	0.00517793	Abi2/Fgfr2/Frs2/Prox1/Smarca4/Tmod1	6	Bone fibres
2	GO:0048742	regulation of skeletal muscle fiber development	5/3021	13/28943	0.0077425	0.0220846	0.0123438	Bcl2/Hdac4/Hdac5/Hdac9/Naca	5	Bone fibres
2	GO:0098528	skeletal muscle fiber differentiation	4/3021	10/28943	0.0148331	0.0384273	0.0214783	Hdac4/Hdac5/Hdac9/Nln	4	Bone fibres
2	GO:1903034	regulation of response to wounding	41/3021	177/28943	7.4e-07	6.04e-06	3.37e-06	Abat/Adamts18/Ajap1/Ano6/Arfgef1/Braf/Cask/Clasp1/Clasp2/Crk/Dmtn/Epha4/Ephb2/Fermt2/Igf1r/Kank1/Lrig2/Lrp1/Map2k1/Mtor/Neo1/Nrg1/Ntrk3/Plpp3/Prkce/Prkg1/Pten/Ptk2/Ptn/Ptprf/Ptprs/Rreb1/Rtn4r/Rtn4rl1/Smad3/Smoc2/St3gal4/Tafa5/Tnr/Ubash3b/Xylt1	41	Wounding
2	GO:0044319	wound healing	10/3021	34/28943	0.00187857	0.00661684	0.00369837	Arhgap35/Clasp1/Clasp2/Fermt2/Mrtfa/Mtor/Pard3/Pten/Rreb1/Tmeff2	10	Wounding
2	GO:0042060	wound healing spreading of cells	60/3021	380/28943	0.000766458	0.00302849	0.00169272	Abat/Adamts18/Ajap1/Ano6/Ap3b1/Arfgef1/Arhgap35/Arl8b/Axl/B4galt1/Cask/Clasp1/Clasp2/Crk/Dmtn/Dst/Epb41l4b/Ephb2/Evl/Ext1/Fermt2/Hif1a/Kank1/Lyst/Macf1/Mertk/Mrtfa/Mtor/Naca/Nf1/Notch2/Nrg1/Pak1/Pard3/Pik3cb/Plec/Plpp3/Ppard/Pparg/Prkca/Prkce/Prkg1/Pten/Ptk2/Ptprj/Rab27a/Rreb1/Slc7a11/Smad3/Smad4/Smoc2/St3gal4/Stxbp1/Stxbp3/Syt11/Syt7/Tafa5/Tmeff2/Tpm1/Ubash3b	60	Wounding
2	GO:1903036	positive regulation of response to wounding	18/3021	79/28943	0.00110112	0.00415888	0.00232454	Ano6/Arfgef1/Braf/Dmtn/Fermt2/Igf1r/Kank1/Lrp1/Mtor/Nrg1/Ntrk3/Plpp3/Prkce/Ptk2/Ptn/Rreb1/Smoc2/St3gal4	18	Wounding
2	GO:1903035	negative regulation of response to wounding	20/3021	94/28943	0.00148337	0.00539122	0.00301333	Abat/Adamts18/Ajap1/Cask/Clasp1/Clasp2/Crk/Epha4/Lrig2/Neo1/Prkg1/Pten/Ptprs/Rtn4r/Rtn4rl1/Smad3/Tafa5/Tnr/Ubash3b/Xylt1	20	Wounding
2	GO:0090505	epiboly involved in wound healing	10/3021	34/28943	0.00187857	0.00661684	0.00369837	Arhgap35/Clasp1/Clasp2/Fermt2/Mrtfa/Mtor/Pard3/Pten/Rreb1/Tmeff2	10	Wounding
2	GO:0061041	regulation of wound healing	25/3021	137/28943	0.00393105	0.012388	0.00692408	Abat/Adamts18/Ajap1/Ano6/Arfgef1/Cask/Clasp1/Clasp2/Crk/Dmtn/Ephb2/Fermt2/Kank1/Mtor/Plpp3/Prkce/Prkg1/Pten/Ptk2/Rreb1/Smad3/Smoc2/St3gal4/Tafa5/Ubash3b	25	Wounding
2	GO:0035313	wound healing spreading of epidermal cells	6/3021	20/28943	0.0137306	0.0361998	0.0202333	Clasp1/Clasp2/Fermt2/Mtor/Pten/Rreb1	6	Wounding
2	GO:0008333	endosome to lysosome transport	23/3021	73/28943	7.74e-07	6.3e-06	3.52e-06	Arl8b/Bin1/Cacng2/Cacng3/Cacng7/Cacng8/Clec16a/Epg5/Gprasp1/Hook3/Kif13a/Lyst/Mgrn1/Mtm1/Rab12/Rab7/Rnf157/Snx27/Sort1/Stx8/Trak1/Trak2/Vps41	23	Wounding
2	GO:0061462	protein localization to lysosome	13/3021	47/28943	0.000787748	0.00310267	0.00173418	Ap3b1/Cacng2/Cacng3/Cacng7/Cacng8/Lamp2/Lmbrd1/Nedd4/Rab7/Rock2/Rtn4/Sorl1/Sort1	13	Wounding
2	GO:0090160	Golgi to lysosome transport	5/3021	11/28943	0.00332157	0.0106803	0.00596957	Ankfy1/Ap1g1/Ehd3/Gak/Sort1	5	Wounding
0	GO:0043536	positive regulation of blood vessel endothelial cell migration	4/236	57/28943	0.0012132	0.0112428	0.00784041	Angpt1/Hdac9/Prkca/Prkd1	4	Endothelial cell differentiation
0	GO:0010595	positive regulation of endothelial cell migration	5/236	110/28943	0.00211151	0.0164856	0.0114966	Angpt1/Bcas3/Hdac9/Prkca/Prkd1	5	Endothelial cell differentiation
0	GO:0045446	endothelial cell differentiation	5/236	120/28943	0.00307961	0.0214139	0.0149335	Arhgef26/Dmd/Nrg1/Pde4d/Plcb1	5	Endothelial cell differentiation
0	GO:0001885	endothelial cell development	4/236	74/28943	0.00317314	0.0215429	0.0150234	Arhgef26/Dmd/Pde4d/Plcb1	4	Endothelial cell differentiation
0	GO:0010594	regulation of endothelial cell migration	6/236	176/28943	0.00330809	0.0223135	0.0155608	Angpt1/Bcas3/Hdac9/Prkca/Prkd1/Ptprm	6	Endothelial cell differentiation
0	GO:0043535	regulation of blood vessel endothelial cell migration	4/236	95/28943	0.00769123	0.0393766	0.0274601	Angpt1/Hdac9/Prkca/Prkd1	4	Endothelial cell differentiation
1	GO:0043536	positive regulation of blood vessel endothelial cell migration	4/162	57/28943	0.000296509	0.00589935	0.00467424	Angpt1/Hdac9/Prkca/Prkd1	4	Endothelial cell differentiation
1	GO:0010595	positive regulation of endothelial cell migration	5/162	110/28943	0.000393725	0.00741813	0.00587761	Angpt1/Bcas3/Hdac9/Prkca/Prkd1	5	Endothelial cell differentiation
1	GO:0043535	regulation of blood vessel endothelial cell migration	4/162	95/28943	0.00202738	0.0250598	0.0198556	Angpt1/Hdac9/Prkca/Prkd1	4	Endothelial cell differentiation
1	GO:0010594	regulation of endothelial cell migration	5/162	176/28943	0.00318433	0.0342833	0.0271637	Angpt1/Bcas3/Hdac9/Prkca/Prkd1	5	Endothelial cell differentiation
1	GO:0043534	blood vessel endothelial cell migration	4/162	122/28943	0.0049801	0.0455349	0.0360787	Angpt1/Hdac9/Prkca/Prkd1	4	Endothelial cell differentiation
2	GO:0043542	endothelial cell migration	53/3021	234/28943	4.27e-08	4.41e-07	2.46e-07	Abl1/Adamts9/Adgrb1/Akt3/Angpt1/Atp2b4/Bcar1/Bcas3/Bmper/Bmpr2/Ccbe1/Cdh13/Dab2ip/Fbxw7/Fgfr1/Foxp1/Fstl1/Gpi1/Gpld1/Hdac5/Hdac7/Hdac9/Hif1a/Itgav/Lemd3/Map2k5/Map3k3/Mecp2/Mef2c/Nf1/Nrp1/Pdpk1/Pik3c2a/Pik3cb/Plekhg5/Plpp3/Pparg/Prkca/Prkd1/Prox1/Pten/Ptk2/Ptk2b/Ptprm/Robo1/Rock2/Sash1/Sema5a/Slit2/Smoc2/Spred1/Tgfbr1/Tns3	53	Endothelial cell differentiation
2	GO:0010594	regulation of endothelial cell migration	43/3021	176/28943	8.17e-08	8e-07	4.47e-07	Abl1/Adamts9/Adgrb1/Akt3/Angpt1/Atp2b4/Bcar1/Bcas3/Bmper/Bmpr2/Ccbe1/Dab2ip/Fbxw7/Fgfr1/Foxp1/Gpi1/Gpld1/Hdac5/Hdac7/Hdac9/Hif1a/Map2k5/Map3k3/Mecp2/Mef2c/Nf1/Nrp1/Pdpk1/Pik3c2a/Pik3cb/Plpp3/Pparg/Prkca/Prkd1/Prox1/Ptk2b/Ptprm/Rock2/Sash1/Sema5a/Slit2/Smoc2/Spred1	43	Endothelial cell differentiation
2	GO:0045446	endothelial cell differentiation	30/3021	120/28943	4.27e-06	3e-05	1.67e-05	Acvr1/Add1/Afdn/Akap11/Arhgef26/Bmpr2/Ccm2/Ctnnb1/Dmd/Fstl1/Nrg1/Pbrm1/Pde4d/Plcb1/Ppp1r16b/Prox1/Ptprs/Rap1a/Rapgef1/Rapgef2/Rbpj/Rock1/Rock2/Smad4/Tgfbr1/Tjp1/Tjp2/Vcl/Zdhhc21/Zeb1	30	Endothelial cell differentiation
2	GO:0010595	positive regulation of endothelial cell migration	27/3021	110/28943	1.81e-05	0.000109356	6.11e-05	Abl1/Akt3/Angpt1/Bcar1/Bcas3/Bmpr2/Ccbe1/Fgfr1/Foxp1/Gpi1/Gpld1/Hdac7/Hdac9/Hif1a/Map3k3/Nrp1/Pik3c2a/Pik3cb/Plpp3/Prkca/Prkd1/Prox1/Ptk2b/Rock2/Sash1/Sema5a/Smoc2	27	Endothelial cell differentiation
2	GO:0061028	establishment of endothelial barrier	16/3021	52/28943	5.02e-05	0.000274172	0.000153244	Add1/Afdn/Akap11/Pde4d/Plcb1/Ppp1r16b/Ptprs/Rap1a/Rapgef1/Rapgef2/Rock1/Rock2/Tjp1/Tjp2/Vcl/Zdhhc21	16	Endothelial cell differentiation
2	GO:0001885	endothelial cell development	19/3021	74/28943	0.000159818	0.000760707	0.000425184	Add1/Afdn/Akap11/Arhgef26/Ccm2/Dmd/Pde4d/Plcb1/Ppp1r16b/Ptprs/Rap1a/Rapgef1/Rapgef2/Rock1/Rock2/Tjp1/Tjp2/Vcl/Zdhhc21	19	Endothelial cell differentiation
2	GO:0038084	vascular endothelial growth factor signaling pathway	13/3021	42/28943	0.000234927	0.00107425	0.000600434	Adamts3/Ccbe1/Dab2ip/Gab1/Nrp1/Nrp2/Pik3ca/Pik3cb/Prkd1/Robo1/Sema6a/Smoc2/Tcf4	13	Endothelial cell differentiation
2	GO:0043534	blood vessel endothelial cell migration	26/3021	122/28943	0.000309162	0.0013612	0.000760818	Abl1/Akt3/Angpt1/Atp2b4/Fbxw7/Fgfr1/Gpld1/Hdac5/Hdac7/Hdac9/Hif1a/Lemd3/Map2k5/Map3k3/Mecp2/Mef2c/Nf1/Nrp1/Pik3c2a/Pparg/Prkca/Prkd1/Ptk2b/Robo1/Slit2/Spred1	26	Endothelial cell differentiation
2	GO:0035924	cellular response to vascular endothelial growth factor stimulus	16/3021	60/28943	0.000323119	0.00141758	0.000792334	Adamts3/Atp2b4/Ccbe1/Dab2ip/Ern1/Gab1/Mapk14/Nrp1/Nrp2/Pik3ca/Pik3cb/Prkd1/Robo1/Sema6a/Smoc2/Tcf4	16	Endothelial cell differentiation
2	GO:1902547	regulation of cellular response to vascular endothelial growth factor stimulus	9/3021	24/28943	0.000440091	0.0018593	0.00103922	Adamts3/Atp2b4/Ccbe1/Dab2ip/Pik3cb/Robo1/Sema6a/Smoc2/Tcf4	9	Endothelial cell differentiation
2	GO:0043535	regulation of blood vessel endothelial cell migration	21/3021	95/28943	0.000679148	0.00270161	0.00151002	Abl1/Akt3/Angpt1/Atp2b4/Fbxw7/Fgfr1/Hdac5/Hdac7/Hdac9/Hif1a/Map2k5/Map3k3/Mecp2/Mef2c/Nf1/Nrp1/Pik3c2a/Pparg/Prkca/Prkd1/Spred1	21	Endothelial cell differentiation
2	GO:1900746	regulation of vascular endothelial growth factor signaling pathway	8/3021	22/28943	0.00116118	0.00434314	0.00242753	Adamts3/Ccbe1/Dab2ip/Pik3cb/Robo1/Sema6a/Smoc2/Tcf4	8	Endothelial cell differentiation
2	GO:1901550	regulation of endothelial cell development	7/3021	19/28943	0.00217063	0.00743321	0.00415467	Add1/Akap11/Plcb1/Rock1/Rock2/Vcl/Zdhhc21	7	Endothelial cell differentiation
2	GO:1903140	regulation of establishment of endothelial barrier	7/3021	19/28943	0.00217063	0.00743321	0.00415467	Add1/Akap11/Plcb1/Rock1/Rock2/Vcl/Zdhhc21	7	Endothelial cell differentiation
2	GO:0048010	vascular endothelial growth factor receptor signaling pathway	12/3021	48/28943	0.00316457	0.0102665	0.0057383	Angpt1/Bcar1/Dab2ip/Epn2/Grb10/Hif1a/Mapk14/Nedd4/Nrp1/Prkcb/Prkd1/Ptk2b	12	Endothelial cell differentiation
2	GO:0090557	establishment of endothelial intestinal barrier	5/3021	13/28943	0.0077425	0.0220846	0.0123438	Afdn/Ptprs/Rapgef2/Tjp1/Tjp2	5	Endothelial cell differentiation
2	GO:0045601	regulation of endothelial cell differentiation	10/3021	43/28943	0.0115406	0.0312	0.0174387	Add1/Akap11/Ctnnb1/Plcb1/Rock1/Rock2/Tgfbr1/Vcl/Zdhhc21/Zeb1	10	Endothelial cell differentiation
2	GO:0010596	negative regulation of endothelial cell migration	12/3021	56/28943	0.0116179	0.0313678	0.0175325	Adamts9/Adgrb1/Atp2b4/Dab2ip/Hdac5/Map2k5/Mecp2/Mef2c/Pparg/Ptprm/Slit2/Spred1	12	Endothelial cell differentiation
2	GO:0030947	regulation of vascular endothelial growth factor receptor signaling pathway	8/3021	31/28943	0.0122394	0.0327304	0.0182941	Angpt1/Dab2ip/Epn2/Grb10/Hif1a/Nedd4/Nrp1/Prkcb	8	Endothelial cell differentiation
2	GO:0043536	positive regulation of blood vessel endothelial cell migration	12/3021	57/28943	0.0133544	0.0355425	0.0198659	Abl1/Akt3/Angpt1/Fgfr1/Hdac7/Hdac9/Hif1a/Map3k3/Nrp1/Pik3c2a/Prkca/Prkd1	12	Endothelial cell differentiation
2	GO:0000910	cytokinesis	38/3021	190/28943	6.43e-05	0.000342314	0.000191331	Actr2/Actr3/Ank3/Anxa11/Apc/Bcl2l1/Birc6/Cdc42/Cspp1/Cul3/Exoc2/Exoc3/Exoc4/Exoc5/Exoc6/Exoc6b/Fmn2/Igf1r/Kif13a/Map9/Pkn2/Pkp4/Plec/Prkce/Prpf40a/Rab11fip3/Rab11fip4/Rock1/Rock2/Septin11/Septin3/Septin7/Setd2/Son/Spire1/Sptbn1/Usp8/Uvrag	38	Cytokine production
2	GO:0061640	cytoskeleton-dependent cytokinesis	22/3021	101/28943	0.000633859	0.00256463	0.00143346	Actr2/Actr3/Ank3/Apc/Exoc2/Exoc3/Exoc4/Exoc5/Exoc6/Exoc6b/Fmn2/Map9/Plec/Rock1/Rock2/Septin11/Septin3/Septin7/Son/Spire1/Sptbn1/Usp8	22	Cytokine production
2	GO:0000281	mitotic cytokinesis	15/3021	76/28943	0.0111491	0.0302379	0.0169009	Ank3/Apc/Exoc2/Exoc3/Exoc4/Exoc5/Exoc6/Exoc6b/Map9/Rock1/Rock2/Septin7/Son/Sptbn1/Usp8	15	Cytokine production
2	GO:0033206	meiotic cytokinesis	4/3021	10/28943	0.0148331	0.0384273	0.0214783	Actr2/Actr3/Fmn2/Spire1	4	Cytokine production
0	GO:0050890	cognition	17/236	358/28943	7.45e-09	1.11e-06	7.73e-07	Adgrb3/Atxn1/Csmd1/Ctnnd2/Cyp7b1/Fgf13/Gria1/Grm5/Meis2/Nrg1/Nrxn1/Ntrk2/Pde4d/Plcb1/Prkca/Prkn/Rcan2	17	Congnition
1	GO:0050890	cognition	15/162	358/28943	1.91e-09	3.65e-07	2.89e-07	Adgrb3/Chl1/Csmd1/Ctnnd2/Cyp7b1/Dgki/Fgf13/Gria1/Nrxn1/Ntrk2/Pde4d/Prkca/Prkn/Rcan2/Shroom4	15	Congnition
2	GO:0050890	cognition	136/3021	358/28943	1.19e-43	5.25e-41	2.93e-41	Abi2/Abl1/Abl2/Adcy1/Adcy8/Adgrb3/Adora1/Aff2/Amph/App/Arl6ip5/Atp1a3/Atp8a1/Atxn1/B3gat1/Bdnf/Bhlhb9/Braf/Brinp1/Btbd9/Cacna1c/Cacna1e/Chd7/Chl1/Chrm1/Chrna7/Ckap5/Cntnap2/Cpeb3/Creb1/Crebbp/Crtc1/Csmd1/Ctnnd2/Cyfip1/Cyp7b1/Deaf1/Dgki/Dop1b/Eif2ak4/Ep300/Ephb2/Epm2a/Fgf13/Gabra5/Gabrb3/Gria1/Grin1/Grin2a/Grin2b/Grm5/Grm7/Hif1a/Hrh1/Htt/Itga8/Jakmip1/Jph3/Kalrn/Kcnab1/Kmt2a/Mapt/Mecp2/Mef2c/Meis2…	136	Congnition
3	GO:0050890	cognition	16/363	358/28943	1.38e-05	0.000645124	0.00052358	Adgrb3/Atxn1/Btbd9/Csmd1/Ctnnd2/Gria1/Kalrn/Nf1/Nrxn1/Ntrk2/Pafah1b1/Pde4d/Plcb1/Prkn/Shank2/Shroom4	16	Congnition
0	GO:0007611	learning or memory	17/236	321/28943	1.45e-09	2.67e-07	1.86e-07	Adgrb3/Atxn1/Csmd1/Ctnnd2/Cyp7b1/Fgf13/Gria1/Grm5/Meis2/Nrg1/Nrxn1/Ntrk2/Pde4d/Plcb1/Prkca/Prkn/Rcan2	17	Learning and memory
0	GO:0007612	learning	10/236	187/28943	3.44e-06	0.000139499	9.73e-05	Adgrb3/Atxn1/Csmd1/Ctnnd2/Fgf13/Grm5/Meis2/Nrxn1/Ntrk2/Prkn	10	Learning and memory
1	GO:0007611	learning or memory	13/162	321/28943	3.56e-08	4.22e-06	3.34e-06	Adgrb3/Csmd1/Ctnnd2/Cyp7b1/Dgki/Fgf13/Gria1/Nrxn1/Ntrk2/Pde4d/Prkca/Prkn/Rcan2	13	Learning and memory
1	GO:0007612	learning	8/162	187/28943	1.11e-05	0.000467714	0.000370585	Adgrb3/Csmd1/Ctnnd2/Dgki/Fgf13/Nrxn1/Ntrk2/Prkn	8	Learning and memory
2	GO:0007611	learning or memory	120/3021	321/28943	7.98e-38	2.59e-35	1.45e-35	Abi2/Abl1/Abl2/Adcy1/Adcy8/Adgrb3/Aff2/Amph/App/Arl6ip5/Atp1a3/Atp8a1/Atxn1/B3gat1/Bdnf/Bhlhb9/Braf/Brinp1/Btbd9/Cacna1c/Cacna1e/Chrna7/Ckap5/Cntnap2/Cpeb3/Creb1/Crebbp/Crtc1/Csmd1/Ctnnd2/Cyp7b1/Deaf1/Dgki/Eif2ak4/Ep300/Ephb2/Epm2a/Fgf13/Gabra5/Gabrb3/Gria1/Grin1/Grin2a/Grin2b/Grm5/Grm7/Hif1a/Hrh1/Htt/Itga8/Jph3/Kalrn/Kcnab1/Kmt2a/Mapt/Mecp2/Mef2c/Meis2/Mtor/Ncam1/Ndrg4/Neto1/Nf1/Nptn/Nrg1/Nrxn1/…	120	Learning and memory
2	GO:0007612	learning	77/3021	187/28943	5.93e-28	7.16e-26	4e-26	Abl2/Adgrb3/Amph/App/Atp1a3/Atp8a1/Atxn1/B3gat1/Bdnf/Braf/Cacna1c/Cacna1e/Chrna7/Ckap5/Cntnap2/Creb1/Csmd1/Ctnnd2/Deaf1/Dgki/Eif2ak4/Ephb2/Epm2a/Fgf13/Gabra5/Gabrb3/Grin1/Grin2a/Grin2b/Grm5/Grm7/Hif1a/Hrh1/Htt/Jph3/Kalrn/Kmt2a/Mecp2/Meis2/Mtor/Ndrg4/Neto1/Nf1/Nptn/Nrxn1/Nrxn2/Nrxn3/Ntrk2/Pak1/Pak5/Pak6/Pde8b/Prkar2b/Prkn/Ptn/Sgk1/Shank1/Shank2/Shank3/Slc12a5/Slc1a1/Slc24a2/Slc7a11/Slc8a2/Slc8a3/S…	77	Learning and memory
2	GO:0008306	associative learning	45/3021	120/28943	4.04e-15	1.15e-13	6.42e-14	Abl2/App/Atp1a3/Atxn1/B3gat1/Bdnf/Braf/Cacna1c/Cacna1e/Chrna7/Ckap5/Cntnap2/Creb1/Csmd1/Deaf1/Gabra5/Grin1/Grin2a/Grin2b/Grm7/Hif1a/Hrh1/Htt/Kmt2a/Mecp2/Meis2/Mtor/Ndrg4/Neto1/Nf1/Nptn/Pde8b/Sgk1/Shank1/Shank2/Shank3/Slc1a1/Slc7a11/Snap25/Specc1/Syngap1/Tafa2/Tanc1/Tnr/Zzef1	45	Learning and memory
2	GO:0008542	visual learning	31/3021	73/28943	1.52e-12	3.06e-11	1.71e-11	Abl2/App/Atp1a3/Atxn1/B3gat1/Braf/Cacna1c/Cacna1e/Ckap5/Creb1/Deaf1/Grin1/Grin2a/Hif1a/Hrh1/Htt/Kmt2a/Mecp2/Meis2/Mtor/Ndrg4/Neto1/Nf1/Nptn/Pde8b/Sgk1/Slc7a11/Syngap1/Tafa2/Tanc1/Zzef1	31	Learning and memory
2	GO:0098598	learned vocalization behavior or vocal learning	6/3021	10/28943	0.000186182	0.000870733	0.000486681	Cntnap2/Htt/Nrxn1/Nrxn2/Shank3/Stra6	6	Learning and memory
3	GO:0007611	learning or memory	15/363	321/28943	1.53e-05	0.000692324	0.000561888	Adgrb3/Atxn1/Btbd9/Csmd1/Ctnnd2/Gria1/Kalrn/Nf1/Nrxn1/Ntrk2/Pafah1b1/Pde4d/Plcb1/Prkn/Shank2	15	Learning and memory
3	GO:0007612	learning	10/363	187/28943	0.000135026	0.00392613	0.00318643	Adgrb3/Atxn1/Csmd1/Ctnnd2/Kalrn/Nf1/Nrxn1/Ntrk2/Prkn/Shank2	10	Learning and memory
4	GO:0030307	positive regulation of cell growth	5/54	211/28943	4.64e-05	0.036397	0.0263554	Bcl2/Prkn/Prr5/Rptor/Slc9a1	5	Unique Cluster4
4	GO:0071456	cellular response to hypoxia	4/54	110/28943	5.4e-05	0.036397	0.0263554	Bcl2/Fmn2/Rptor/Slc9a1	4	Unique Cluster4
4	GO:0031929	TOR signaling	4/54	131/28943	0.000106369	0.036397	0.0263554	Ccdc88a/Epm2a/Prr5/Rptor	4	Unique Cluster4
4	GO:0036294	cellular response to decreased oxygen levels	4/54	135/28943	0.000119474	0.036397	0.0263554	Bcl2/Fmn2/Rptor/Slc9a1	4	Unique Cluster4
4	GO:0071453	cellular response to oxygen levels	4/54	151/28943	0.000183804	0.036397	0.0263554	Bcl2/Fmn2/Rptor/Slc9a1	4	Unique Cluster4
4	GO:0010506	regulation of autophagy	5/54	285/28943	0.000190526	0.036397	0.0263554	Bcl2/Epm2a/Prkn/Rptor/Tfeb	5	Unique Cluster4
4	GO:0001558	regulation of cell growth	6/54	459/28943	0.000208843	0.036397	0.0263554	Bcl2/Epm2a/Prkn/Prr5/Rptor/Slc9a1	6	Unique Cluster4
4	GO:0006914	autophagy	6/54	469/28943	0.000234483	0.036397	0.0263554	Bcl2/Epm2a/Prkn/Rptor/Sbf2/Tfeb	6	Unique Cluster4
4	GO:0061919	process utilizing autophagic mechanism	6/54	469/28943	0.000234483	0.036397	0.0263554	Bcl2/Epm2a/Prkn/Rptor/Sbf2/Tfeb	6	Unique Cluster4
4	GO:0045927	positive regulation of growth	5/54	324/28943	0.000343942	0.0480487	0.0347924	Bcl2/Prkn/Prr5/Rptor/Slc9a1	5	Unique Cluster4

## Sheet: Oligo-GO terms
Supplementary Table 3：Oligodendrocytes subclusters enrichment the reported function and pathways associated with AD.
Cluster	ID	Description	GeneRatio	BgRatio	pvalue	p.adjust	qvalue	geneID	Count	type
2	GO:0006914	autophagy	76/2318	469/28943	2.89789e-09	4.61788e-08	2.79964e-08	Abl1/Ambra1/Arl8b/Arsb/Atf6/Atg10/Atg4c/Atg7/Atp6v0a1/Clec16a/Cltc/Dapk1/Depdc5/Elapor1/Fbxw7/Fez1/Foxk1/Foxk2/Foxo1/Foxo3/Gsk3b/Herc1/Htt/Huwe1/Lrba/Lrrk2/Lzts1/Map2k1/Map3k7/Mapt/Mid2/Mtcl1/Mtmr3/Mtor/Myo5a/Ogt/Pik3c2b/Pik3cb/Pikfyve/Pip4k2a/Prkaa1/Prkaa2/Prkd1/Prkn/Psen1/Ptk2/Rab3gap2/Rab7/Rb1cc1/Retreg1/Rock1/Rptor/Rubcn/Sbf2/Sesn1/Smg1/Smurf1/Snca/Snx30/Snx7/Soga3/Tbc1d5/Tfeb/Tpcn1/Trappc8/U…	76	autophagy
2	GO:0010506	regulation of autophagy	51/2318	285/28943	4.64643e-08	6.07737e-07	3.68447e-07	Ambra1/Atf6/Atg7/Atp6v0a1/Clec16a/Dapk1/Depdc5/Elapor1/Fbxw7/Fez1/Foxk1/Foxk2/Foxo1/Foxo3/Gsk3b/Herc1/Htt/Lrrk2/Lzts1/Map2k1/Map3k7/Mapt/Mid2/Mtcl1/Mtmr3/Mtor/Pip4k2a/Prkaa1/Prkaa2/Prkd1/Prkn/Ptk2/Rab3gap2/Rb1cc1/Rock1/Rptor/Rubcn/Sesn1/Smg1/Snca/Snx30/Snx7/Soga3/Tfeb/Tpcn1/Ulk2/Usp13/Uvrag/Vps13c/Vps13d/Wac	51	autophagy
2	GO:0016236	macroautophagy	44/2318	249/28943	5.4167e-07	5.79088e-06	3.51078e-06	Ambra1/Arl8b/Atg10/Atg7/Atp6v0a1/Clec16a/Elapor1/Fez1/Htt/Huwe1/Lrba/Lrrk2/Lzts1/Map3k7/Mtmr3/Mtor/Myo5a/Ogt/Pik3c2b/Pikfyve/Pip4k2a/Prkaa2/Prkn/Psen1/Rab3gap2/Rab7/Rb1cc1/Retreg1/Rubcn/Sesn1/Smg1/Smurf1/Snx30/Snx7/Tbc1d5/Trappc8/Ulk2/Uvrag/Vps13c/Vps13d/Vps41/Vti1a/Wac/Wdfy3	44	autophagy
2	GO:0010508	positive regulation of autophagy	31/2318	152/28943	1.12905e-06	1.11435e-05	6.75584e-06	Ambra1/Atf6/Atg7/Clec16a/Dapk1/Depdc5/Elapor1/Foxo1/Foxo3/Gsk3b/Htt/Lrrk2/Map2k1/Map3k7/Mid2/Pip4k2a/Prkaa1/Prkaa2/Prkd1/Prkn/Rab3gap2/Rb1cc1/Rock1/Sesn1/Snx30/Snx7/Tfeb/Tpcn1/Ulk2/Vps13d/Wac	31	autophagy
2	GO:0016241	regulation of macroautophagy	22/2318	117/28943	0.000137987	0.000824852	0.000500075	Ambra1/Atp6v0a1/Clec16a/Elapor1/Fez1/Htt/Lrrk2/Lzts1/Map3k7/Mtor/Pip4k2a/Prkaa2/Prkn/Rab3gap2/Rubcn/Sesn1/Smg1/Snx30/Snx7/Vps13c/Vps13d/Wac	22	autophagy
2	GO:0061912	selective autophagy	17/2318	83/28943	0.000267934	0.00147351	0.000893331	Ambra1/Clec16a/Htt/Huwe1/Lrba/Ogt/Prkn/Rab7/Rb1cc1/Retreg1/Smurf1/Snx30/Snx7/Ulk2/Vps13c/Vps13d/Wdfy3	17	autophagy
2	GO:0000422	autophagy of mitochondrion	17/2318	84/28943	0.000311178	0.00165588	0.0010039	Ambra1/Atg7/Clec16a/Fbxw7/Htt/Huwe1/Lrba/Ogt/Prkn/Rb1cc1/Retreg1/Smurf1/Snx30/Snx7/Ulk2/Vps13c/Vps13d	17	autophagy
2	GO:1903146	regulation of autophagy of mitochondrion	7/2318	26/28943	0.00353728	0.0131607	0.00797882	Ambra1/Clec16a/Fbxw7/Htt/Prkn/Vps13c/Vps13d	7	autophagy
2	GO:0010507	negative regulation of autophagy	13/2318	75/28943	0.00625884	0.0211805	0.0128409	Clec16a/Fez1/Foxk1/Foxk2/Herc1/Lrrk2/Lzts1/Mtor/Ptk2/Rptor/Rubcn/Smg1/Snca	13	autophagy
2	GO:0016239	positive regulation of macroautophagy	13/2318	77/28943	0.00783076	0.0256769	0.0155669	Ambra1/Clec16a/Elapor1/Htt/Map3k7/Pip4k2a/Prkn/Rab3gap2/Sesn1/Snx30/Snx7/Vps13d/Wac	13	autophagy
2	GO:1903599	positive regulation of autophagy of mitochondrion	4/2318	11/28943	0.00856228	0.027318	0.0165618	Ambra1/Htt/Prkn/Vps13d	4	autophagy
2	GO:0016242	negative regulation of macroautophagy	7/2318	32/28943	0.0118716	0.0362713	0.0219898	Clec16a/Fez1/Lrrk2/Lzts1/Mtor/Rubcn/Smg1	7	autophagy
0	GO:1902043	positive regulation of extrinsic apoptotic signaling pathway via death domain receptors	3/401	16/28943	0.00129265	0.0167017	0.0129182	Faf1/Mal/Trps1	3	apoptotic
0	GO:0051402	neuron apoptotic process	12/401	329/28943	0.00230393	0.025747	0.0199144	App/Bcl2l1/Grid2/Grik2/Grm7/Hipk2/Oxr1/Prkn/Rb1/Retreg1/Trim2/Xrcc4	12	apoptotic
0	GO:0043523	regulation of neuron apoptotic process	11/401	290/28943	0.00256381	0.0274091	0.0212	App/Bcl2l1/Grid2/Grik2/Grm7/Hipk2/Oxr1/Prkn/Retreg1/Trim2/Xrcc4	11	apoptotic
0	GO:0097284	hepatocyte apoptotic process	3/401	23/28943	0.00380485	0.0355479	0.0274951	Bcl2l1/Igf1r/Rb1	3	apoptotic
0	GO:1902041	regulation of extrinsic apoptotic signaling pathway via death domain receptors	4/401	51/28943	0.00543049	0.0463912	0.035882	Bcl2l1/Faf1/Mal/Trps1	4	apoptotic
0	GO:0008625	extrinsic apoptotic signaling pathway via death domain receptors	5/401	83/28943	0.00597736	0.0497666	0.0384928	Bcl2l1/Faf1/Mal/Pik3r1/Trps1	5	apoptotic
0	GO:0043524	negative regulation of neuron apoptotic process	8/401	195/28943	0.00604088	0.0497666	0.0384928	Bcl2l1/Grik2/Grm7/Hipk2/Oxr1/Prkn/Retreg1/Xrcc4	8	apoptotic
1	GO:0043523	regulation of neuron apoptotic process	12/280	290/28943	2.88201e-05	0.00120216	0.000920348	App/Bcl2l1/Fyn/Grid2/Grik2/Grm7/Hipk2/Oxr1/Prkn/Retreg1/Trim2/Xrcc4	12	apoptotic
1	GO:0051402	neuron apoptotic process	12/280	329/28943	9.66338e-05	0.00293152	0.00224431	App/Bcl2l1/Fyn/Grid2/Grik2/Grm7/Hipk2/Oxr1/Prkn/Retreg1/Trim2/Xrcc4	12	apoptotic
1	GO:0043524	negative regulation of neuron apoptotic process	9/280	195/28943	0.000127056	0.00344703	0.00263898	Bcl2l1/Fyn/Grik2/Grm7/Hipk2/Oxr1/Prkn/Retreg1/Xrcc4	9	apoptotic
1	GO:0070782	phosphatidylserine exposure on apoptotic cell surface	2/280	11/28943	0.00484196	0.0394088	0.0301705	Xkr6/Xrcc4	2	apoptotic
1	GO:2001236	regulation of extrinsic apoptotic signaling pathway	6/280	164/28943	0.00536701	0.0429117	0.0328523	Bcl2l1/Faf1/Fyn/Pak5/Trps1/Wwox	6	apoptotic
1	GO:0043653	mitochondrial fragmentation involved in apoptotic process	2/280	12/28943	0.0057734	0.0445969	0.0341424	Erbb4/Prkn	2	apoptotic
2	GO:0051402	neuron apoptotic process	68/2318	329/28943	3.25449e-13	9.71744e-12	5.8913e-12	Aatk/Abl1/Adarb1/Ambra1/App/Atf2/Bdnf/Bhlhb9/Braf/Cacna1a/Cdc42/Chl1/Cpeb4/Epha7/Fbxw7/Foxo3/Fyn/Gabra5/Gabrb2/Gabrb3/Grid2/Grik2/Grik5/Grin1/Grm7/Gsk3b/Hdac4/Hipk2/Htt/Itsn1/Kcnb1/Kcnip3/Kcnma1/Map2k4/Mapk8/Mecp2/Mef2c/Nf1/Nr3c1/Nrp1/Ntrk2/Oxr1/Pak3/Pdpk1/Pik3ca/Polb/Ppargc1a/Ppp2r2b/Prkcg/Prkci/Prkn/Psen1/Ptk2b/Ptprz1/Rb1/Retreg1/Rock1/Scn2a/Slc1a1/Snca/Srpk2/Stxbp1/Syngap1/Thrb/Tox3/Trim2/Vps5…	68	apoptotic
2	GO:0043523	regulation of neuron apoptotic process	62/2318	290/28943	7.56593e-13	2.12999e-11	1.29133e-11	Abl1/Ambra1/App/Atf2/Bdnf/Bhlhb9/Braf/Cacna1a/Cdc42/Chl1/Cpeb4/Epha7/Fbxw7/Foxo3/Fyn/Gabra5/Gabrb2/Gabrb3/Grid2/Grik2/Grik5/Grin1/Grm7/Gsk3b/Hdac4/Hipk2/Htt/Itsn1/Kcnb1/Kcnip3/Kcnma1/Map2k4/Mapk8/Mecp2/Mef2c/Nf1/Nr3c1/Nrp1/Ntrk2/Oxr1/Pak3/Pdpk1/Pik3ca/Ppargc1a/Ppp2r2b/Prkcg/Prkci/Prkn/Psen1/Ptk2b/Ptprz1/Retreg1/Rock1/Slc1a1/Snca/Srpk2/Stxbp1/Syngap1/Tox3/Trim2/Vps54/Xrcc4	62	apoptotic
2	GO:0043524	negative regulation of neuron apoptotic process	40/2318	195/28943	2.85493e-08	3.86232e-07	2.34157e-07	Ambra1/Bdnf/Bhlhb9/Braf/Cacna1a/Chl1/Cpeb4/Fyn/Gabra5/Gabrb2/Gabrb3/Grik2/Grin1/Grm7/Hipk2/Itsn1/Map2k4/Mecp2/Mef2c/Nrp1/Ntrk2/Oxr1/Pdpk1/Pik3ca/Ppargc1a/Prkcg/Prkci/Prkn/Psen1/Ptk2b/Ptprz1/Retreg1/Rock1/Slc1a1/Snca/Stxbp1/Syngap1/Tox3/Vps54/Xrcc4	40	apoptotic
2	GO:0010657	muscle cell apoptotic process	23/2318	108/28943	1.24762e-05	9.36034e-05	5.6748e-05	Ambra1/Atg7/Camk2a/Dicer1/E2f3/Erbb4/Gnb1/Gria4/Gsk3b/Igf1r/Kifap3/Lifr/Lrp6/Map2k4/Mapk8/Nrg1/Pdcd4/Pdpk1/Pparg/Pten/Ptk2b/Rbm10/Rps6ka2	23	apoptotic
2	GO:0043525	positive regulation of neuron apoptotic process	19/2318	88/28943	5.66186e-05	0.000370686	0.000224732	Abl1/App/Atf2/Cdc42/Epha7/Fbxw7/Foxo3/Grik2/Grik5/Gsk3b/Hdac4/Kcnma1/Map2k4/Mapk8/Nf1/Nr3c1/Pak3/Ppp2r2b/Srpk2	19	apoptotic
2	GO:0010660	regulation of muscle cell apoptotic process	21/2318	103/28943	5.78048e-05	0.000375954	0.000227926	Ambra1/Atg7/Camk2a/Dicer1/E2f3/Erbb4/Gria4/Gsk3b/Igf1r/Kifap3/Lifr/Lrp6/Map2k4/Mapk8/Nrg1/Pdcd4/Pdpk1/Pparg/Pten/Ptk2b/Rbm10	21	apoptotic
2	GO:0097284	hepatocyte apoptotic process	8/2318	23/28943	0.000274216	0.00149629	0.000907144	Adar/Atf2/Gsk3b/Igf1r/Lims1/Prkaa1/Rb1/Stk3	8	apoptotic
2	GO:1904019	epithelial cell apoptotic process	25/2318	148/28943	0.000293405	0.00158412	0.000960389	Abl1/Abl2/Adar/Ano6/Apc/Atf2/Atg7/Bmpr2/Braf/Foxo3/Gsk3b/Igf1r/Lims1/Mapk8/Mtor/Pdcd4/Ppargc1a/Prkaa1/Prkci/Rb1/Ryr2/Sema5a/Sort1/Spop/Stk3	25	apoptotic
2	GO:2001236	regulation of extrinsic apoptotic signaling pathway	25/2318	164/28943	0.00137667	0.00591917	0.00358856	Acvr1/Birc6/Cyld/Eya1/Eya3/Faf1/Fyn/Gsk3b/Htt/Madd/Map2k5/Nf1/Nrg1/Nrp1/Pak5/Phip/Pten/Rb1cc1/Sh3rf1/Src/Stk3/Tgfbr1/Trps1/Wwox/Zmynd11	25	apoptotic
2	GO:0034390	smooth muscle cell apoptotic process	8/2318	30/28943	0.00197483	0.00805735	0.00488485	E2f3/Gria4/Gsk3b/Lrp6/Map2k4/Pdcd4/Pparg/Rbm10	8	apoptotic
2	GO:0034391	regulation of smooth muscle cell apoptotic process	8/2318	30/28943	0.00197483	0.00805735	0.00488485	E2f3/Gria4/Gsk3b/Lrp6/Map2k4/Pdcd4/Pparg/Rbm10	8	apoptotic
2	GO:2001237	negative regulation of extrinsic apoptotic signaling pathway	17/2318	99/28943	0.0021429	0.00857853	0.00520082	Acvr1/Birc6/Eya1/Eya3/Fyn/Gsk3b/Htt/Map2k5/Nrg1/Nrp1/Pak5/Phip/Rb1cc1/Sh3rf1/Src/Tgfbr1/Zmynd11	17	apoptotic
2	GO:1904035	regulation of epithelial cell apoptotic process	19/2318	116/28943	0.00214463	0.00857853	0.00520082	Abl1/Abl2/Adar/Ano6/Apc/Atg7/Braf/Foxo3/Igf1r/Lims1/Mtor/Pdcd4/Ppargc1a/Prkaa1/Prkci/Rb1/Sema5a/Sort1/Spop	19	apoptotic
2	GO:0097191	extrinsic apoptotic signaling pathway	32/2318	238/28943	0.00271967	0.010585	0.00641729	Acvr1/Birc6/Cyld/Dab2ip/Dapk1/Eya1/Eya3/Faf1/Foxo3/Fyn/Gsk3b/Htt/Il33/Madd/Map2k5/Nf1/Nrg1/Nrp1/Pak5/Phip/Pten/Rb1cc1/Rock2/Sh3rf1/Smad3/Sort1/Src/Stk3/Tgfbr1/Trps1/Wwox/Zmynd11	32	apoptotic
2	GO:2001234	negative regulation of apoptotic signaling pathway	32/2318	241/28943	0.00330707	0.0124294	0.00753542	Aatf/Acvr1/Bdnf/Birc6/Caap1/Eya1/Eya3/Fyn/Gsk3b/Htt/Lrrk2/Madd/Map2k1/Map2k5/Map3k7/Mdm4/Mrtfa/Nrg1/Nrp1/Pak5/Phip/Pik3cb/Prkn/Psen1/Rb1/Rb1cc1/Sh3rf1/Src/Tgfbr1/Uri1/Usp47/Zmynd11	32	apoptotic
2	GO:0034393	positive regulation of smooth muscle cell apoptotic process	5/2318	14/28943	0.00355208	0.0131661	0.00798208	E2f3/Map2k4/Pdcd4/Pparg/Rbm10	5	apoptotic
2	GO:0097049	motor neuron apoptotic process	7/2318	27/28943	0.00444992	0.0159496	0.00966958	Adarb1/Atf2/Kcnb1/Map2k4/Rock1/Slc1a1/Vps54	7	apoptotic
2	GO:0010656	negative regulation of muscle cell apoptotic process	12/2318	65/28943	0.00504385	0.0175511	0.0106405	Ambra1/Atg7/Erbb4/Gria4/Gsk3b/Igf1r/Kifap3/Lifr/Lrp6/Nrg1/Pdpk1/Ptk2b	12	apoptotic
2	GO:1904036	negative regulation of epithelial cell apoptotic process	12/2318	70/28943	0.00921087	0.029089	0.0176355	Abl1/Abl2/Adar/Apc/Atg7/Braf/Igf1r/Lims1/Mtor/Prkaa1/Rb1/Sema5a	12	apoptotic
2	GO:0010661	positive regulation of muscle cell apoptotic process	8/2318	39/28943	0.0109126	0.0338485	0.020521	Camk2a/E2f3/Map2k4/Mapk8/Pdcd4/Pparg/Pten/Rbm10	8	apoptotic
2	GO:2001233	regulation of apoptotic signaling pathway	45/2318	401/28943	0.0137811	0.040921	0.0248088	Aatf/Acvr1/Bdnf/Birc6/Caap1/Camk2b/Cyld/Dab2ip/Eya1/Eya3/Faf1/Fbxw7/Fyn/Gsk3b/Htt/Lrrk2/Madd/Map2k1/Map2k5/Map3k7/Mapk8/Mdm4/Mrtfa/Nck2/Nf1/Nrg1/Nrp1/Pak5/Phip/Pik3cb/Prkn/Psen1/Pten/Rb1/Rb1cc1/Sh3rf1/Spop/Src/Stk3/Tgfbr1/Trps1/Uri1/Usp47/Wwox/Zmynd11	45	apoptotic
2	GO:0043488	regulation of mRNA stability	26/2318	164/28943	0.000616399	0.00298946	0.00181239	Cacng7/Celf1/Cnot2/Cnot6l/Cpeb3/Dcp1b/Dicer1/Fto/Gigyf2/Larp4b/Mtor/Pan3/Parn/Pum1/Pum2/Rbm10/Rc3h1/Rc3h2/Rock1/Rock2/Samd4/Taf15/Tnrc6b/Tnrc6c/Ythdf3/Zc3h14	26	regulation of mRNA
2	GO:1903311	regulation of mRNA metabolic process	59/2318	317/28943	9.10847e-10	1.57454e-08	9.54581e-09	Acin1/Adarb1/Cacng7/Cdc73/Celf1/Celf2/Celf3/Celf4/Celf5/Cnot2/Cnot6l/Cpeb1/Cpeb3/Dcp1b/Dicer1/Dyrk1a/Fam172a/Fto/Gigyf2/Hnrnpc/Khdrbs2/Khdrbs3/Larp4b/Malat1/Mbnl1/Mbnl2/Mtor/Nbas/Nova1/Nova2/Pan3/Papola/Parn/Prr5l/Pum1/Pum2/Qki/Rbfox1/Rbfox2/Rbfox3/Rbm10/Rbm25/Rbm39/Rbm5/Rc3h1/Rc3h2/Rock1/Rock2/Samd4/Sfswap/Sltm/Srpk2/Srrm4/Taf15/Tnrc6b/Tnrc6c/Ythdf3/Zc3h14/Zc3h3	59	regulation of mRNA
2	GO:0050684	regulation of mRNA processing	34/2318	154/28943	4.67283e-08	6.09841e-07	3.69722e-07	Acin1/Adarb1/Cdc73/Celf1/Celf2/Celf3/Celf4/Celf5/Cpeb1/Cpeb3/Dyrk1a/Fam172a/Khdrbs2/Khdrbs3/Malat1/Mbnl1/Mbnl2/Nova1/Nova2/Papola/Qki/Rbfox1/Rbfox2/Rbfox3/Rbm10/Rbm25/Rbm39/Rbm5/Sfswap/Sltm/Srpk2/Srrm4/Zc3h14/Zc3h3	34	regulation of mRNA
2	GO:0006402	mRNA catabolic process	41/2318	246/28943	5.91543e-06	4.7895e-05	2.90368e-05	Ago3/Cacng7/Celf1/Cnot2/Cnot6l/Cpeb3/Ctif/Dcp1b/Dicer1/Dis3l2/Fto/Gigyf2/Larp4b/Mtor/Nbas/Pan3/Parn/Prr5l/Pum1/Pum2/Rbm10/Rc3h1/Rc3h2/Rock1/Rock2/Samd4/Smg1/Smg6/Smg7/Snd1/Taf15/Tent2/Tnrc6b/Tnrc6c/Ttc37/Xrn1/Xrn2/Ythdf3/Zc3h14/Zcchc7/Zhx2	41	regulation of mRNA
2	GO:0006397	mRNA processing	66/2318	476/28943	8.80835e-06	6.85197e-05	4.15408e-05	Acin1/Adar/Adarb1/Adarb2/Aff2/App/Cdc73/Cdk13/Celf1/Celf2/Celf3/Celf4/Celf5/Cnot6l/Cpeb1/Cpeb3/Ctnnbl1/Dyrk1a/Fam172a/Fip1l1/Gm21992/Hnrnpc/Khdrbs2/Khdrbs3/Luc7l2/Malat1/Mbnl1/Mbnl2/Nova1/Nova2/Pan3/Papola/Plcb1/Ppp4r2/Prpf40a/Ptbp2/Qki/Rbfox1/Rbfox2/Rbfox3/Rbm10/Rbm25/Rbm26/Rbm39/Rbm41/Rbm5/Rbm6/Rngtt/Rprd1b/Rprd2/Rsrc1/Scaf8/Sfswap/Sltm/Snrpn/Srpk2/Srrm4/Tcerg1/Tdrd3/Tent2/Thoc2/Wdr33/Xrn2/Zc3h…	66	regulation of mRNA
2	GO:0006376	mRNA splice site selection	9/2318	27/28943	0.0001653	0.000964714	0.000584868	Celf1/Celf2/Celf3/Celf4/Celf5/Luc7l2/Mbnl1/Ptbp2/Sfswap	9	regulation of mRNA
2	GO:0000956	nuclear-transcribed mRNA catabolic process	22/2318	124/28943	0.000327057	0.00172948	0.00104852	Cnot2/Cnot6l/Cpeb3/Ctif/Dcp1b/Dis3l2/Nbas/Pan3/Parn/Rc3h1/Rc3h2/Samd4/Smg1/Smg6/Smg7/Tent2/Tnrc6b/Tnrc6c/Ttc37/Xrn1/Xrn2/Zcchc7	22	regulation of mRNA
2	GO:0061014	positive regulation of mRNA catabolic process	19/2318	102/28943	0.000433025	0.00221266	0.00134145	Celf1/Cnot2/Cnot6l/Cpeb3/Dcp1b/Fto/Gigyf2/Pan3/Parn/Prr5l/Pum1/Rc3h1/Rc3h2/Rock1/Rock2/Samd4/Tnrc6b/Tnrc6c/Ythdf3	19	regulation of mRNA
2	GO:0043488	regulation of mRNA stability	26/2318	164/28943	0.000616399	0.00298946	0.00181239	Cacng7/Celf1/Cnot2/Cnot6l/Cpeb3/Dcp1b/Dicer1/Fto/Gigyf2/Larp4b/Mtor/Pan3/Parn/Pum1/Pum2/Rbm10/Rc3h1/Rc3h2/Rock1/Rock2/Samd4/Taf15/Tnrc6b/Tnrc6c/Ythdf3/Zc3h14	26	regulation of mRNA
2	GO:0061157	mRNA destabilization	18/2318	97/28943	0.00063501	0.00304722	0.00184741	Celf1/Cnot2/Cnot6l/Cpeb3/Dcp1b/Fto/Gigyf2/Pan3/Parn/Pum1/Rc3h1/Rc3h2/Rock1/Rock2/Samd4/Tnrc6b/Tnrc6c/Ythdf3	18	regulation of mRNA
2	GO:0061013	regulation of mRNA catabolic process	28/2318	183/28943	0.000695335	0.00329273	0.00199625	Cacng7/Celf1/Cnot2/Cnot6l/Cpeb3/Dcp1b/Dicer1/Fto/Gigyf2/Larp4b/Mtor/Nbas/Pan3/Parn/Prr5l/Pum1/Pum2/Rbm10/Rc3h1/Rc3h2/Rock1/Rock2/Samd4/Taf15/Tnrc6b/Tnrc6c/Ythdf3/Zc3h14	28	regulation of mRNA
2	GO:1903313	positive regulation of mRNA metabolic process	24/2318	148/28943	0.000704809	0.00332283	0.0020145	Adarb1/Cdc73/Celf1/Celf3/Celf4/Cnot2/Cnot6l/Cpeb1/Cpeb3/Dcp1b/Fto/Gigyf2/Pan3/Parn/Prr5l/Pum1/Rc3h1/Rc3h2/Rock1/Rock2/Samd4/Tnrc6b/Tnrc6c/Ythdf3	24	regulation of mRNA
2	GO:0000289	nuclear-transcribed mRNA poly(A) tail shortening	8/2318	27/28943	0.000929715	0.00423131	0.00256528	Cnot2/Cnot6l/Cpeb3/Pan3/Parn/Samd4/Tnrc6b/Tnrc6c	8	regulation of mRNA
2	GO:0006378	mRNA polyadenylation	11/2318	47/28943	0.000992647	0.00445937	0.00270354	App/Cdc73/Cpeb1/Cpeb3/Fip1l1/Papola/Scaf8/Tent2/Wdr33/Zc3h14/Zc3h3	11	regulation of mRNA
2	GO:0031124	mRNA 3'-end processing	13/2318	63/28943	0.00126703	0.00550382	0.00333675	App/Cdc73/Cpeb1/Cpeb3/Fip1l1/Papola/Rprd1b/Rprd2/Scaf8/Tent2/Wdr33/Zc3h14/Zc3h3	13	regulation of mRNA
2	GO:0006835	dicarboxylic acid transport	24/2318	90/28943	1.04716e-07	1.30332e-06	7.90154e-07	Abcc5/Apba1/Bdnf/Dpysl2/Grin2b/Grm1/Grm7/Lrrc8c/Lrrc8d/Myo6/Nf1/Nr3c1/Ntrk2/Pak1/Psen1/Slc12a2/Slc17a7/Slc1a1/Slc1a2/Slc25a12/Slc25a13/Slc25a14/Snca/Stxbp1	24	dicarboxylic acid transport
0	GO:0043547	positive regulation of GTPase activity	18/401	261/28943	3.05137e-08	4.18038e-06	3.23338e-06	Agap1/Amph/Arap2/Bcas3/Cdkl5/Dennd1a/Dock10/Dock9/Gnao1/Iqsec1/Map4k4/Picalm/Pkp4/Rabgap1l/Ralgps1/Rap1gds1/Rsu1/Tbc1d5	18	GTPase activity
0	GO:0043087	regulation of GTPase activity	20/401	351/28943	1.23397e-07	1.20118e-05	9.2907e-06	Agap1/Amph/Arap2/Bcas3/Cdkl5/Dennd1a/Dgki/Dock10/Dock9/Gnao1/Iqsec1/Map4k4/Picalm/Pkp4/Rabgap1l/Ralgps1/Rap1gds1/Rsu1/Sbf2/Tbc1d5	20	GTPase activity
0	GO:0007264	small GTPase mediated signal transduction	22/401	434/28943	2.20556e-07	1.8973e-05	1.46749e-05	Arhgef28/Auts2/Cdc42bpa/Cdh2/Dennd1a/Dgki/Dock1/Dock10/Dock3/Dock4/Dock9/Elmo1/Erbin/Iqsec1/Kndc1/Map4k4/Psd3/Ralgps1/Rhoj/Robo1/Rsu1/Shtn1	22	GTPase activity
0	GO:0051056	regulation of small GTPase mediated signal transduction	12/401	236/28943	0.000123438	0.00304397	0.00235441	Arhgef28/Auts2/Cdc42bpa/Cdh2/Dennd1a/Dgki/Erbin/Iqsec1/Map4k4/Psd3/Ralgps1/Robo1	12	GTPase activity
0	GO:0051057	positive regulation of small GTPase mediated signal transduction	5/401	79/28943	0.00485205	0.0431268	0.0333571	Auts2/Dgki/Erbin/Map4k4/Robo1	5	GTPase activity
1	GO:0007264	small GTPase mediated signal transduction	15/280	434/28943	2.46847e-05	0.00106978	0.000818998	Abca1/Arhgef28/Auts2/Cdc42bpa/Dgki/Dock1/Dock10/Dock3/Dock9/Elmo1/Erbin/Heg1/Psd3/Rasa3/Rsu1	15	GTPase activity
1	GO:0043087	regulation of GTPase activity	12/280	351/28943	0.000176539	0.00430007	0.00329204	Adap1/Agap1/Bcas3/Cdkl5/Dgki/Dock10/Dock9/Gnao1/Pkp4/Rasa3/Rsu1/Tbc1d5	12	GTPase activity
1	GO:0051056	regulation of small GTPase mediated signal transduction	9/280	236/28943	0.000519518	0.00893625	0.0068414	Abca1/Arhgef28/Auts2/Cdc42bpa/Dgki/Erbin/Heg1/Psd3/Rasa3	9	GTPase activity
1	GO:0043547	positive regulation of GTPase activity	9/280	261/28943	0.00106	0.0139811	0.0107036	Agap1/Bcas3/Cdkl5/Dock10/Dock9/Gnao1/Pkp4/Rsu1/Tbc1d5	9	GTPase activity
2	GO:0043087	regulation of GTPase activity	117/2318	351/28943	1.51982e-42	8.16834e-40	4.95214e-40	Abr/Adap1/Afdn/Agap1/Agap3/Amph/Arap2/Arfgef1/Arhgap12/Arhgap15/Arhgap35/Arhgap44/Arhgef10/Arhgef7/Asap1/Asap2/Bcas3/Bcr/Cblb/Ccl25/Cdkl5/Chn1/Chn2/Dab2ip/Dennd1a/Dennd1b/Dgki/Dock10/Dock7/Dock9/Efna5/Elmod1/Epha3/Epha4/Epha5/Garnl3/Gnao1/Gsk3b/Iqgap2/Iqsec1/Iqsec3/Kalrn/Lims1/Lrch1/Lrrk2/Map2k1/Map4k4/Mapre2/Mtor/Myo9a/Nf1/Ngef/Ntrk2/Ntrk3/Ocrl/Pafah1b1/Picalm/Pip5k1a/Pkp4/Plxna2/Plxna4/Prex1/Pr…	117	GTPase activity
2	GO:0007264	small GTPase mediated signal transduction	128/2318	434/28943	5.00663e-40	2.27686e-37	1.38037e-37	Abi2/Abl1/Abl2/Adcyap1r1/Arfgef1/Arfgef2/Arfgef3/Arhgap12/Arhgap17/Arhgap32/Arhgap35/Arhgap44/Arhgap5/Arhgef10/Arhgef12/Arhgef28/Arhgef7/Arhgef9/Arl3/Auts2/Baiap2/Bcr/Ccdc88a/Cdc42/Cdc42bpa/Cdh13/Cdh2/Cdon/Chm/Chn1/Cyfip1/Cyrib/Cyth1/Cyth3/Dab1/Dab2ip/Dennd1a/Dennd4a/Dennd4c/Dgki/Dlc1/Dnm2/Dock1/Dock10/Dock3/Dock4/Dock7/Dock9/Elmo1/Ephb2/Erbin/Fbxo8/Garnl3/Gna12/Grb2/Iqsec1/Iqsec2/Iqsec3/Itpkb/It…	128	GTPase activity
2	GO:0043547	positive regulation of GTPase activity	84/2318	261/28943	1.24898e-29	2.73481e-27	1.65801e-27	Abr/Afdn/Agap1/Agap3/Amph/Arap2/Arhgap35/Arhgef10/Arhgef7/Asap1/Asap2/Bcas3/Bcr/Ccl25/Cdkl5/Chn1/Chn2/Dennd1a/Dennd1b/Dock10/Dock7/Dock9/Elmod1/Garnl3/Gnao1/Gsk3b/Iqsec1/Iqsec3/Kalrn/Lims1/Map2k1/Map4k4/Mapre2/Myo9a/Nf1/Ngef/Ntrk3/Picalm/Pip5k1a/Pkp4/Prex1/Ptk2b/Rabgap1/Rabgap1l/Ralgapa1/Ralgapa2/Ralgapb/Ralgps1/Ralgps2/Rap1a/Rap1gap2/Rap1gds1/Rapgef1/Rapgef2/Rapgef4/Rapgef5/Rapgef6/Rasa1/Rasgef1…	84	GTPase activity
2	GO:0051056	regulation of small GTPase mediated signal transduction	77/2318	236/28943	1.0428e-27	1.50367e-25	9.11616e-26	Abl1/Abl2/Adcyap1r1/Arfgef1/Arfgef2/Arfgef3/Arhgap12/Arhgap17/Arhgap35/Arhgap44/Arhgef10/Arhgef28/Auts2/Bcr/Cdc42bpa/Cdh2/Cdon/Chn1/Cyrib/Cyth1/Cyth3/Dab2ip/Dennd1a/Dennd4a/Dennd4c/Dgki/Dlc1/Dnm2/Ephb2/Erbin/Fbxo8/Garnl3/Iqsec1/Iqsec2/Iqsec3/Itpkb/Lpar1/Madd/Map2k1/Map4k4/Mapkap1/Mapre2/Mcf2l/Mmd2/Nf1/Notch2/Nrg1/Nrp1/Ogt/Ophn1/Pik3cb/Psd3/Ralgapa1/Ralgapa2/Ralgapb/Ralgps1/Ralgps2/Rap1gap2/Rapgef…	77	GTPase activity
2	GO:0090630	activation of GTPase activity	33/2318	104/28943	2.59351e-12	6.75456e-11	4.09502e-11	Abr/Agap1/Agap3/Arhgef10/Bcas3/Bcr/Dock7/Garnl3/Iqsec3/Ngef/Ntrk3/Pip5k1a/Ptk2b/Rabgap1/Rabgap1l/Ralgapa2/Ralgapb/Rap1gap2/Rapgef1/Rasa1/Rasgrf1/Rasgrp1/Sgsm1/Sgsm2/Sipa1l1/Sipa1l2/Sipa1l3/Tbc1d1/Tbc1d16/Tbc1d22a/Tbc1d5/Tbck/Tiam1	33	GTPase activity
2	GO:0051057	positive regulation of small GTPase mediated signal transduction	22/2318	79/28943	1.53064e-07	1.84301e-06	1.11734e-06	Adcyap1r1/Auts2/Cdon/Dgki/Erbin/Itpkb/Lpar1/Map2k1/Map4k4/Mapre2/Mcf2l/Mmd2/Notch2/Nrg1/Pik3cb/Rasgef1a/Rasgrf1/Rasgrp1/Robo1/Rtn4r/Sos1/Src	22	GTPase activity
2	GO:0051058	negative regulation of small GTPase mediated signal transduction	17/2318	62/28943	4.88209e-06	4.0652e-05	2.46457e-05	Abl2/Arhgap12/Arhgap35/Arhgap44/Cyrib/Dab2ip/Dlc1/Ephb2/Mapkap1/Nf1/Rapgef1/Rasa2/Rasa3/Ripor2/Scai/Slit2/Syngap1	17	GTPase activity
2	GO:0034260	negative regulation of GTPase activity	9/2318	32/28943	0.00068596	0.00325734	0.0019748	Arfgef1/Bcas3/Dab2ip/Lrch1/Lrrk2/Ptprn2/Rap1gds1/Ttc8/Wnk1	9	GTPase activity
3	GO:0007264	small GTPase mediated signal transduction	15/322	434/28943	0.000119693	0.00566391	0.00457637	Arfgef1/Arhgap17/Auts2/Cdc42bpa/Cdc42se2/Dab1/Dock9/Elmo1/Iqsec1/Kndc1/Map4k4/Psd3/Rock1/Scai/Sos1	15	GTPase activity
3	GO:0043547	positive regulation of GTPase activity	11/322	261/28943	0.000180117	0.00697636	0.00563681	Agap1/Amph/Arap2/Dock9/Gnao1/Iqsec1/Map4k4/Pkp4/Rabgap1l/Sos1/Tbc1d5	11	GTPase activity
3	GO:0051056	regulation of small GTPase mediated signal transduction	10/322	236/28943	0.000337029	0.0105206	0.00850051	Arfgef1/Arhgap17/Auts2/Cdc42bpa/Cdc42se2/Iqsec1/Map4k4/Psd3/Scai/Sos1	10	GTPase activity
3	GO:0043087	regulation of GTPase activity	12/322	351/28943	0.000621461	0.0141338	0.0114199	Agap1/Amph/Arap2/Arfgef1/Dock9/Gnao1/Iqsec1/Map4k4/Pkp4/Rabgap1l/Sos1/Tbc1d5	12	GTPase activity
0	GO:0071870	cellular response to catecholamine stimulus	6/401	72/28943	0.000492582	0.00838204	0.00648323	Adcy5/Akap6/App/Gnao1/Gnaq/Pde4b	6	response to catecholamine
0	GO:0071869	response to catecholamine	6/401	75/28943	0.000613158	0.00969261	0.00749691	Adcy5/Akap6/App/Gnao1/Gnaq/Pde4b	6	response to catecholamine
1	GO:0071870	cellular response to catecholamine stimulus	5/280	72/28943	0.000674115	0.0102718	0.00786386	Akap6/App/Gnao1/Gnaq/Pde4b	5	response to catecholamine
1	GO:0071869	response to catecholamine	5/280	75/28943	0.000812241	0.0114365	0.00875554	Akap6/App/Gnao1/Gnaq/Pde4b	5	response to catecholamine
2	GO:0071870	cellular response to catecholamine stimulus	18/2318	72/28943	1.07129e-05	8.23598e-05	4.99315e-05	Adcy5/Akap6/App/Atp2b4/Dnm2/Gnal/Gnao1/Gnaq/Htr4/Htt/Lrrk2/Mapk1/Nsg2/Pde4b/Pde4d/Rgs8/Ryr2/Slc1a1	18	response to catecholamine
2	GO:0071869	response to catecholamine	18/2318	75/28943	1.96113e-05	0.000140877	8.54084e-05	Adcy5/Akap6/App/Atp2b4/Dnm2/Gnal/Gnao1/Gnaq/Htr4/Htt/Lrrk2/Mapk1/Nsg2/Pde4b/Pde4d/Rgs8/Ryr2/Slc1a1	18	response to catecholamine
2	GO:1903649	regulation of cytoplasmic transport	13/2318	29/28943	1.07677e-07	1.33737e-06	8.10792e-07	Atp9a/Dnajc13/Eipr1/Lrrk2/Map2/Map2k1/Mapk1/Mapk8/Mecp2/Snx12/Sorl1/Src/Trim46	13	cytoplasmic transport
2	GO:1903651	positive regulation of cytoplasmic transport	5/2318	13/28943	0.00244349	0.00961778	0.00583088	Eipr1/Map2/Mecp2/Sorl1/Trim46	5	cytoplasmic transport
2	GO:0031122	cytoplasmic microtubule organization	12/2318	62/28943	0.0033781	0.0126561	0.0076729	Apc/Ccdc88a/Clasp1/Clip1/Dlg1/Dst/Numa1/Pafah1b1/Pcm1/Pde4dip/Slain1/Tacc2	12	cytoplasmic transport
2	GO:0006913	nucleocytoplasmic transport	41/2318	347/28943	0.00803125	0.0262615	0.0159213	Adam10/Adar/Agap3/Anp32a/Arntl/Atf2/Atxn1/Bach2/E2f3/Gsk3b/Inpp4b/Ipo11/Kpna3/Lrrk2/Mapk1/Mapk14/Nedd4/Nf1/Nsun2/Nup214/Nup93/Phip/Pkia/Pkig/Ppp1r12a/Ppp3ca/Prickle1/Prkd1/Psen1/Ptpn5/Ranbp17/Rsrc1/Sarnp/Setd2/Smurf1/Stk3/Thoc2/Tnpo1/Ubr5/Xpo6/Xpo7	41	cytoplasmic transport
0	GO:0042552	myelination	13/401	175/28943	1.10798e-06	6.7187e-05	5.19669e-05	Adam22/Bcas1/Cdh2/Dlg1/Gjc3/Mal/Mbp/Nfasc/Pard3/Ptn/Qki/Slc8a3/Ugt8a	13	myelination
1	GO:0042552	myelination	7/280	175/28943	0.00163608	0.019224	0.0147175	Bcas1/Fyn/Gjc3/Mbp/Pard3/Ptn/Tspan2	7	myelination
2	GO:0042552	myelination	38/2318	175/28943	1.25699e-08	1.8214e-07	1.10424e-07	Adam22/Arhgef10/Atrn/Cdh2/Cntn1/Cntnap2/Cyfip1/Dicer1/Dlg1/Epb41l3/Fa2h/Fig4/Fyn/Jam3/Mbp/Mpdz/Mtor/Myo5a/Nf1/Nfasc/Nrg1/Ntrk2/Ntrk3/Pard3/Pikfyve/Plec/Pten/Ptn/Ptprz1/Qki/Serinc5/Ski/Slc8a3/Tenm4/Trf/Tspan2/Ugt8a/Wasf3	38	myelination
2	GO:0022011	myelination in peripheral nervous system	11/2318	32/28943	2.25014e-05	0.000158935	9.63557e-05	Adam22/Arhgef10/Dicer1/Fa2h/Nf1/Nrg1/Ntrk2/Ntrk3/Pard3/Plec/Ski	11	myelination
2	GO:0031641	regulation of myelination	13/2318	60/28943	0.000783161	0.00367756	0.00222956	Cdh2/Cyfip1/Dicer1/Dlg1/Fig4/Mtor/Pard3/Pten/Ptn/Ptprz1/Tenm4/Trf/Wasf3	13	myelination
3	GO:0042552	myelination	7/322	175/28943	0.00356323	0.0428125	0.034592	Cntn1/Cntnap2/Fyn/Gjc3/Mbp/Nfasc/Pals1	7	myelination
0	GO:0048017	inositol lipid-mediated signaling	9/401	171/28943	0.000667256	0.0102414	0.00792139	Erbb4/Gab2/Igf1r/Pik3r1/Plcl1/Pld1/Ppp1r16b/Prr5l/Ptk2	9	lipid
0	GO:0045332	phospholipid translocation	5/401	52/28943	0.000757996	0.0113058	0.00874462	Ano4/Atp8a1/Atp9a/Xkr4/Xrcc4	5	lipid
0	GO:0006687	glycosphingolipid metabolic process	5/401	53/28943	0.000827553	0.0120516	0.00932154	B3galt1/Map7/St3gal3/St6galnac3/Ugt8a	5	lipid
0	GO:0006688	glycosphingolipid biosynthetic process	4/401	31/28943	0.000849479	0.0121555	0.00940189	B3galt1/St3gal3/St6galnac3/Ugt8a	4	lipid
0	GO:0034204	lipid translocation	5/401	54/28943	0.000901756	0.0127313	0.00984722	Ano4/Atp8a1/Atp9a/Xkr4/Xrcc4	5	lipid
0	GO:0097035	regulation of membrane lipid distribution	5/401	59/28943	0.00134923	0.0172097	0.0133111	Ano4/Atp8a1/Atp9a/Xkr4/Xrcc4	5	lipid
0	GO:0017121	plasma membrane phospholipid scrambling	3/401	22/28943	0.00334259	0.0323672	0.0250349	Ano4/Xkr4/Xrcc4	3	lipid
1	GO:0045332	phospholipid translocation	7/280	52/28943	6.78523e-07	7.54744e-05	5.77816e-05	Abca1/Ano4/Atp10b/Atp8a1/Atp9a/Xkr6/Xrcc4	7	lipid
1	GO:0034204	lipid translocation	7/280	54/28943	8.83514e-07	8.63412e-05	6.6101e-05	Abca1/Ano4/Atp10b/Atp8a1/Atp9a/Xkr6/Xrcc4	7	lipid
1	GO:0097035	regulation of membrane lipid distribution	7/280	59/28943	1.63317e-06	0.000131406	0.000100601	Abca1/Ano4/Atp10b/Atp8a1/Atp9a/Xkr6/Xrcc4	7	lipid
1	GO:0015914	phospholipid transport	7/280	92/28943	3.19667e-05	0.00125498	0.000960783	Abca1/Ano4/Atp10b/Atp8a1/Atp9a/Xkr6/Xrcc4	7	lipid
1	GO:0048017	inositol lipid-mediated signaling	9/280	171/28943	4.63716e-05	0.00164619	0.00126029	Erbb4/Fyn/Insr/Pik3r1/Plcl1/Pld1/Ppp1r16b/Prr5l/Ptk2	9	lipid
1	GO:0017121	plasma membrane phospholipid scrambling	3/280	22/28943	0.00120376	0.0151296	0.0115829	Ano4/Xkr6/Xrcc4	3	lipid
2	GO:0006644	phospholipid metabolic process	62/2318	367/28943	1.67965e-08	2.3928e-07	1.45066e-07	Abca8b/Abhd12/Abhd6/Acsl6/Agpat4/Cept1/Chka/Chpt1/Dgkb/Dgkd/Dgkg/Dgkh/Dgki/Enpp2/Erbb4/Etnk1/Far1/Fig4/Gpam/Hycc2/Inpp4b/Inpp5a/Itpkb/Lclat1/Lpgat1/Lyst/Mboat2/Mecp2/Mtmr1/Mtmr12/Mtmr3/Mtmr7/Ocrl/Pi4ka/Pign/Pigu/Pik3c2b/Pik3ca/Pik3cb/Pikfyve/Pip4k2a/Pip5k1a/Pip5k1b/Pitpnc1/Plcb1/Pld1/Plpp1/Plpp4/Plppr1/Plppr4/Plppr5/Pnpla8/Ptdss1/Pten/Serinc5/Sgms1/Smg1/Smpd3/Snca/Ttc7b/Uvrag/Vac14	62	lipid
2	GO:0006650	glycerophospholipid metabolic process	49/2318	277/28943	1.22091e-07	1.50689e-06	9.13568e-07	Abhd12/Abhd6/Cept1/Chka/Chpt1/Dgkb/Dgkd/Dgkg/Dgkh/Dgki/Enpp2/Etnk1/Far1/Fig4/Gpam/Hycc2/Inpp4b/Inpp5a/Itpkb/Lclat1/Lpgat1/Mboat2/Mecp2/Mtmr1/Mtmr12/Mtmr3/Mtmr7/Ocrl/Pi4ka/Pign/Pigu/Pik3c2b/Pik3ca/Pik3cb/Pikfyve/Pip4k2a/Pip5k1a/Pip5k1b/Pitpnc1/Plcb1/Pld1/Pnpla8/Ptdss1/Pten/Serinc5/Smg1/Ttc7b/Uvrag/Vac14	49	lipid
2	GO:0046486	glycerolipid metabolic process	59/2318	382/28943	8.56687e-07	8.70229e-06	5.27586e-06	Abhd12/Abhd2/Abhd6/Acsl6/Cept1/Chka/Chpt1/Dagla/Dgkb/Dgkd/Dgkg/Dgkh/Dgki/Enpp2/Etnk1/Faah/Far1/Fig4/Gpam/Hycc2/Inpp4b/Inpp5a/Itpkb/Lclat1/Lpgat1/Lpin2/Mboat2/Mecp2/Mtmr1/Mtmr12/Mtmr3/Mtmr7/Ocrl/Pi4ka/Pign/Pigu/Pik3c2b/Pik3ca/Pik3cb/Pikfyve/Pip4k2a/Pip5k1a/Pip5k1b/Pitpnc1/Plcb1/Pld1/Plpp1/Pnpla8/Ptdss1/Pten/Sel1l/Serinc5/Smg1/Sorl1/Tbl1xr1/Thrb/Ttc7b/Uvrag/Vac14	59	lipid
2	GO:0046839	phospholipid dephosphorylation	14/2318	44/28943	4.94154e-06	4.10314e-05	2.48757e-05	Fig4/Inpp4b/Inpp5a/Mtmr1/Mtmr12/Mtmr3/Mtmr7/Ocrl/Plpp1/Plpp4/Plppr1/Plppr4/Plppr5/Pten	14	lipid
2	GO:0048017	inositol lipid-mediated signaling	32/2318	171/28943	5.31482e-06	4.36087e-05	2.64382e-05	Dab2ip/Erbb4/Fyn/Gab2/Igf1r/Insr/Kcnh1/Ncor1/Ncs1/Nedd4/Nf1/Ntrk2/Ntrk3/Nyap2/Ogt/Pi4ka/Pik3c2b/Pik3ca/Pik3cb/Pitpnm2/Plcb1/Plcl1/Plcl2/Pld1/Plekha1/Ppp1r16b/Prr5l/Pten/Ptk2/Rasgrp1/Sema4d/Ube3a	32	lipid
2	GO:0008654	phospholipid biosynthetic process	37/2318	223/28943	1.82202e-05	0.000132985	8.06235e-05	Abca8b/Acsl6/Agpat4/Cept1/Chka/Chpt1/Dgkb/Dgkd/Dgkg/Dgkh/Dgki/Erbb4/Etnk1/Far1/Gpam/Hycc2/Itpkb/Lclat1/Lpgat1/Mboat2/Pi4ka/Pign/Pigu/Pik3c2b/Pik3ca/Pik3cb/Pip4k2a/Pip5k1a/Pip5k1b/Pld1/Ptdss1/Serinc5/Sgms1/Smg1/Ttc7b/Uvrag/Vac14	37	lipid
2	GO:0046474	glycerophospholipid biosynthetic process	28/2318	168/28943	0.000166373	0.000970016	0.000588082	Cept1/Chka/Chpt1/Dgkb/Dgkd/Dgkg/Dgkh/Dgki/Etnk1/Far1/Gpam/Hycc2/Itpkb/Pi4ka/Pign/Pigu/Pik3c2b/Pik3ca/Pik3cb/Pip4k2a/Pip5k1a/Pip5k1b/Pld1/Ptdss1/Smg1/Ttc7b/Uvrag/Vac14	28	lipid
2	GO:0045332	phospholipid translocation	13/2318	52/28943	0.000175752	0.00101568	0.000615769	Ano3/Ano4/Ano6/Atp11a/Atp11b/Atp11c/Atp8a1/Atp8a2/Atp9a/Atp9b/Xkr4/Xkr6/Xrcc4	13	lipid
2	GO:0034204	lipid translocation	13/2318	54/28943	0.000263774	0.00145469	0.000881923	Ano3/Ano4/Ano6/Atp11a/Atp11b/Atp11c/Atp8a1/Atp8a2/Atp9a/Atp9b/Xkr4/Xkr6/Xrcc4	13	lipid
2	GO:0045017	glycerolipid biosynthetic process	32/2318	214/28943	0.000456819	0.00230436	0.00139704	Acsl6/Cept1/Chka/Chpt1/Dgkb/Dgkd/Dgkg/Dgkh/Dgki/Etnk1/Far1/Gpam/Hycc2/Itpkb/Lpgat1/Lpin2/Pi4ka/Pign/Pigu/Pik3c2b/Pik3ca/Pik3cb/Pip4k2a/Pip5k1a/Pip5k1b/Pld1/Plpp1/Ptdss1/Smg1/Ttc7b/Uvrag/Vac14	32	lipid
2	GO:0006688	glycosphingolipid biosynthetic process	9/2318	31/28943	0.000530413	0.00262952	0.00159417	B3galt1/Fa2h/Fut9/St3gal1/St3gal3/St6galnac3/St6galnac5/St8sia5/Ugt8a	9	lipid
2	GO:0046834	lipid phosphorylation	5/2318	10/28943	0.000586783	0.00285755	0.00173242	Dgkb/Dgkd/Dgkg/Dgkh/Dgki	5	lipid
2	GO:0097035	regulation of membrane lipid distribution	13/2318	59/28943	0.000661321	0.00315301	0.00191154	Ano3/Ano4/Ano6/Atp11a/Atp11b/Atp11c/Atp8a1/Atp8a2/Atp9a/Atp9b/Xkr4/Xkr6/Xrcc4	13	lipid
2	GO:0015914	phospholipid transport	17/2318	92/28943	0.000932121	0.00423574	0.00256796	Ano3/Ano4/Ano6/Atp11a/Atp11b/Atp11c/Atp8a1/Atp8a2/Atp9a/Atp9b/Osbpl8/Pitpna/Pitpnc1/Pitpnm2/Xkr4/Xkr6/Xrcc4	17	lipid
2	GO:0019216	regulation of lipid metabolic process	49/2318	388/28943	0.00103642	0.004612	0.00279607	Abhd6/Ambra1/App/Asxl3/Atg7/Bcl11b/Cdc42/Crtc3/Dab2ip/Disp3/Erbb4/Gpam/Igf1r/Kcnma1/Lonp2/Lpgat1/Mlycd/Mtmr1/Mtmr3/Mtor/Ncor1/Nfkb1/Nr3c1/Pde3b/Pde8b/Pibf1/Pip4k2a/Pparg/Ppargc1a/Prkaa1/Prkaa2/Prkag2/Prkce/Prmt3/Prox1/Ptk2b/Rora/Rptor/Rubcn/Sec14l2/Smpd3/Snca/Sorbs1/Sorl1/Src/Tbl1xr1/Thrb/Vav3/Zbtb20	49	lipid
2	GO:0006665	sphingolipid metabolic process	23/2318	146/28943	0.0013442	0.00580916	0.00352186	Abca8b/Atg7/B3galt1/Cers6/Cert1/Elovl6/Enpp2/Fa2h/Fut9/Hacd2/Itgb8/Map7/Plpp1/Serinc5/Sgms1/Smpd3/St3gal1/St3gal3/St6galnac3/St6galnac5/St8sia1/St8sia5/Ugt8a	23	lipid
2	GO:0006687	glycosphingolipid metabolic process	11/2318	53/28943	0.00278754	0.0107747	0.00653228	B3galt1/Fa2h/Fut9/Itgb8/Map7/St3gal1/St3gal3/St6galnac3/St6galnac5/St8sia5/Ugt8a	11	lipid
2	GO:0030258	lipid modification	30/2318	221/28943	0.0031352	0.0118512	0.00718491	Adipor2/B3galt1/Dgkb/Dgkd/Dgkg/Dgkh/Dgki/Fa2h/Fig4/Inpp4b/Inpp5a/Lonp2/Mapk14/Mboat2/Mlycd/Mtmr1/Mtmr12/Mtmr3/Mtmr7/Mtor/Ocrl/Plpp1/Plpp4/Plppr1/Plppr4/Plppr5/Pparg/Ppargc1a/Prkaa1/Pten	30	lipid
2	GO:0006643	membrane lipid metabolic process	26/2318	188/28943	0.00442828	0.0159496	0.00966958	Abca8b/Agmo/Atg7/B3galt1/Cers6/Cert1/Elovl6/Enpp2/Fa2h/Fut9/Hacd2/Itgb8/Map7/Pign/Pigu/Plpp1/Serinc5/Sgms1/Smpd3/St3gal1/St3gal3/St6galnac3/St6galnac5/St8sia1/St8sia5/Ugt8a	26	lipid
2	GO:0030148	sphingolipid biosynthetic process	16/2318	99/28943	0.00527687	0.0182545	0.011067	Abca8b/Atg7/B3galt1/Cers6/Elovl6/Fa2h/Fut9/Hacd2/Sgms1/Smpd3/St3gal1/St3gal3/St6galnac3/St6galnac5/St8sia5/Ugt8a	16	lipid
2	GO:0017121	plasma membrane phospholipid scrambling	6/2318	22/28943	0.00638014	0.0215048	0.0130375	Ano3/Ano4/Ano6/Xkr4/Xkr6/Xrcc4	6	lipid
2	GO:0043550	regulation of lipid kinase activity	10/2318	53/28943	0.00859926	0.0274211	0.0166244	Ambra1/App/Cdc42/Dab2ip/Pip4k2a/Ptk2b/Rb1/Rubcn/Src/Vav3	10	lipid
2	GO:0010876	lipid localization	52/2318	470/28943	0.0112267	0.0347315	0.0210564	Abca8b/Abcc4/Acsl6/Acvr1c/Ano3/Ano4/Ano6/Arl8b/Asxl2/Atp11a/Atp11b/Atp11c/Atp8a1/Atp8a2/Atp9a/Atp9b/Bltp1/Cert1/Dennd5b/Eepd1/Esyt2/Fto/Gramd1b/Hdlbp/Lrp6/Map2k6/Nrg1/Nrip1/Osbp2/Osbpl10/Osbpl1a/Osbpl6/Osbpl8/Osbpl9/Pip4k2a/Pitpna/Pitpnc1/Pitpnm2/Plppr4/Pnpla8/Pparg/Ptch1/Relch/Slco3a1/Stra6/Syt7/Tex2/Tmem135/Vstm2a/Xkr4/Xkr6/Xrcc4	52	lipid
2	GO:0009247	glycolipid biosynthetic process	11/2318	66/28943	0.015144	0.0441259	0.0267518	B3galt1/Fa2h/Fut9/Pign/Pigu/St3gal1/St3gal3/St6galnac3/St6galnac5/St8sia5/Ugt8a	11	lipid
2	GO:0006638	neutral lipid metabolic process	20/2318	149/28943	0.0156805	0.0456215	0.0276585	Abhd12/Abhd2/Abhd6/Acsl6/Dagla/Dgkb/Dgkd/Dgkg/Dgkh/Dgki/Faah/Gpam/Lpgat1/Lpin2/Plpp1/Sel1l/Snca/Sorl1/Tbl1xr1/Thrb	20	lipid
3	GO:0045332	phospholipid translocation	4/322	52/28943	0.0026743	0.036545	0.0295279	Ano4/Atp11b/Atp8a1/Xkr4	4	lipid
3	GO:0034204	lipid translocation	4/322	54/28943	0.00307029	0.0391032	0.0315949	Ano4/Atp11b/Atp8a1/Xkr4	4	lipid
3	GO:0048017	inositol lipid-mediated signaling	7/322	171/28943	0.00313704	0.0394795	0.031899	Erbb4/Fyn/Gsn/Nedd4/Plcl1/Ptk2/Ube3a	7	lipid
3	GO:0097035	regulation of membrane lipid distribution	4/322	59/28943	0.00423122	0.0477738	0.0386006	Ano4/Atp11b/Atp8a1/Xkr4	4	lipid
2	GO:0002924	negative regulation of humoral immune response mediated by circulating immunoglobulin	4/2318	12/28943	0.0120388	0.036443	0.022094	Cd46/Cr1l/Csmd3/Susd4	4	inflammatory response
0	GO:0042063	gliogenesis	15/401	363/28943	0.000186938	0.00421636	0.00326121	Adam22/App/Cdh2/Daam2/Enpp2/Exoc4/Il33/Mal/Nkx2-2os/Pard3/Ptk2/Ptn/Rb1/Slc8a3/Zcchc24	15	gliogenesis
0	GO:0014013	regulation of gliogenesis	8/401	135/28943	0.000607996	0.00969261	0.00749691	Daam2/Enpp2/Il33/Nkx2-2os/Ptk2/Ptn/Rb1/Zcchc24	8	gliogenesis
2	GO:0042063	gliogenesis	66/2318	363/28943	2.62237e-10	4.81473e-09	2.91898e-09	Abl1/Abl2/Adam22/Afdn/App/Arhgef10/Arhgef7/Atxn1/Bmerb1/Cdh2/Cntn1/Cntnap2/Daam2/Dab1/Dab2ip/Dcx/Dicer1/Disc1/Dmd/Enpp2/Epha4/Exoc4/Fa2h/Fubp1/Grin1/Il33/Lingo1/Lrp6/Lrp8/Map2k1/Mapk1/Mecp2/Mtor/Nf1/Nfib/Nfix/Nrg1/Ntrk2/Ntrk3/Pafah1b1/Pard3/Plec/Pparg/Prkci/Psen1/Pten/Ptk2/Ptn/Ptpra/Ptprj/Ptprz1/Rb1/Rras2/Shank3/Ski/Slc8a3/Smarca4/Sox5/Srgap2/Tenm4/Trf/Trpc4/Tspan2/Wasf3/Zcchc24/Zmiz1	66	gliogenesis
2	GO:0014013	regulation of gliogenesis	23/2318	135/28943	0.000443228	0.00225838	0.00136917	Atxn1/Daam2/Dab1/Dicer1/Enpp2/Il33/Lingo1/Mecp2/Mtor/Nf1/Nrg1/Ntrk3/Pparg/Prkci/Ptk2/Ptn/Ptpra/Ptprz1/Rb1/Ski/Tenm4/Trf/Zcchc24	23	gliogenesis
2	GO:0014015	positive regulation of gliogenesis	15/2318	86/28943	0.00325839	0.0122542	0.00742924	Atxn1/Dicer1/Enpp2/Il33/Mecp2/Mtor/Nrg1/Pparg/Prkci/Ptk2/Ptn/Ptpra/Ptprz1/Tenm4/Trf	15	gliogenesis
2	GO:0014014	negative regulation of gliogenesis	10/2318	58/28943	0.0160193	0.0464702	0.0281731	Daam2/Dab1/Dicer1/Lingo1/Mecp2/Nf1/Ntrk3/Ptn/Rb1/Ski	10	gliogenesis
0	GO:0048488	synaptic vesicle endocytosis	9/401	74/28943	8.58849e-07	5.2948e-05	4.09535e-05	Amph/Bcl2l1/Dennd1a/Dnajc6/Dnm3/Itsn2/Nlgn1/Picalm/Sh3gl3	9	endocytosis
0	GO:0140238	presynaptic endocytosis	9/401	74/28943	8.58849e-07	5.2948e-05	4.09535e-05	Amph/Bcl2l1/Dennd1a/Dnajc6/Dnm3/Itsn2/Nlgn1/Picalm/Sh3gl3	9	endocytosis
0	GO:0030100	regulation of endocytosis	15/401	236/28943	1.21676e-06	7.25935e-05	5.61486e-05	Amph/App/Arhgap21/Bcl2l1/Bicd1/Dnajc6/Iqsec1/Magi2/Nlgn1/Pard3/Picalm/Prkca/Rab31/Sh3gl3/Tbc1d5	15	endocytosis
0	GO:0048259	regulation of receptor-mediated endocytosis	10/401	125/28943	1.00433e-05	0.000403804	0.000312329	App/Bicd1/Dnajc6/Iqsec1/Magi2/Pard3/Picalm/Prkca/Sh3gl3/Tbc1d5	10	endocytosis
0	GO:0045807	positive regulation of endocytosis	10/401	127/28943	1.15551e-05	0.000454704	0.000351699	Amph/App/Bcl2l1/Bicd1/Magi2/Nlgn1/Pard3/Picalm/Rab31/Tbc1d5	10	endocytosis
0	GO:0006898	receptor-mediated endocytosis	14/401	274/28943	3.25701e-05	0.00107569	0.000832007	App/Bicd1/Dnajc6/Dnm3/Iqsec1/Itsn2/Magi2/Pard3/Picalm/Prkca/Rab31/Sgip1/Sh3gl3/Tbc1d5	14	endocytosis
0	GO:0072583	clathrin-dependent endocytosis	5/401	45/28943	0.000385692	0.00709789	0.00548998	Dnajc6/Itsn2/Picalm/Sgip1/Sh3gl3	5	endocytosis
0	GO:1900244	positive regulation of synaptic vesicle endocytosis	3/401	12/28943	0.000529174	0.00860687	0.00665713	Bcl2l1/Nlgn1/Picalm	3	endocytosis
0	GO:0048260	positive regulation of receptor-mediated endocytosis	5/401	62/28943	0.001686	0.0208033	0.0160906	App/Bicd1/Magi2/Pard3/Tbc1d5	5	endocytosis
0	GO:1900242	regulation of synaptic vesicle endocytosis	3/401	22/28943	0.00334259	0.0323672	0.0250349	Bcl2l1/Nlgn1/Picalm	3	endocytosis
1	GO:0045807	positive regulation of endocytosis	8/280	127/28943	3.44467e-05	0.00132125	0.00101152	App/Bcl2l1/Insr/Magi2/Nlgn1/Pard3/Rab31/Tbc1d5	8	endocytosis
1	GO:0006898	receptor-mediated endocytosis	11/280	274/28943	8.10777e-05	0.0026015	0.00199166	App/Dnm3/Insr/Magi2/Pard3/Prkca/Rab31/Sgip1/Sh3gl3/Tbc1d5/Tmem108	11	endocytosis
1	GO:0030100	regulation of endocytosis	10/280	236/28943	0.000109621	0.0031129	0.00238317	App/Bcl2l1/Insr/Magi2/Nlgn1/Pard3/Prkca/Rab31/Sh3gl3/Tbc1d5	10	endocytosis
1	GO:0048259	regulation of receptor-mediated endocytosis	7/280	125/28943	0.000222023	0.00499542	0.00382439	App/Insr/Magi2/Pard3/Prkca/Sh3gl3/Tbc1d5	7	endocytosis
1	GO:0048260	positive regulation of receptor-mediated endocytosis	5/280	62/28943	0.000337225	0.00658082	0.00503814	App/Insr/Magi2/Pard3/Tbc1d5	5	endocytosis
1	GO:1900244	positive regulation of synaptic vesicle endocytosis	2/280	12/28943	0.0057734	0.0445969	0.0341424	Bcl2l1/Nlgn1	2	endocytosis
1	GO:0048488	synaptic vesicle endocytosis	4/280	74/28943	0.00580435	0.0446293	0.0341672	Bcl2l1/Dnm3/Nlgn1/Sh3gl3	4	endocytosis
1	GO:0140238	presynaptic endocytosis	4/280	74/28943	0.00580435	0.0446293	0.0341672	Bcl2l1/Dnm3/Nlgn1/Sh3gl3	4	endocytosis
2	GO:0030100	regulation of endocytosis	64/2318	236/28943	1.46326e-18	8.39885e-17	5.09189e-17	Aak1/Add1/Ahi1/Amph/Ano6/App/Arhgap21/Atxn2/Bicd1/Bmp2k/Btbd9/Cdc42/Cdh13/Dcx/Dgkd/Dnajc6/Dnm1/Dnm2/Eef2k/Epha3/Gsg1l/Insr/Iqsec1/Itsn1/Lrrk2/Magi2/Mctp1/Mib1/Mkln1/Napb/Nedd4/Nlgn1/Nrg1/Nsf/Numb/Ophn1/Pacsin1/Pard3/Picalm/Pparg/Ppp3ca/Ppp3cc/Prkca/Pten/Ptpn5/Rab31/Rit2/Rock1/Rubcn/Sh3gl2/Sh3gl3/Slc17a7/Smap1/Snap91/Snca/Snph/Snx12/Src/Ston2/Syt7/Tbc1d5/Trf/Usp46/Wasl	64	endocytosis
2	GO:0006898	receptor-mediated endocytosis	68/2318	274/28943	2.04168e-17	9.89376e-16	5.9982e-16	Aak1/Ahi1/Ap1g1/Ap2a2/Ap4e1/App/Atxn2/AU040320/Bicd1/Bmp2k/Cacng2/Cacng3/Cacng7/Cacng8/Cap1/Cltc/Dgkd/Dnajc13/Dnajc6/Dnm1/Dnm2/Dnm3/Fcho2/Fchsd2/Grb2/Gria1/Gria2/Grk3/Gsg1l/Insr/Iqsec1/Itsn1/Itsn2/Ldlrad3/Lmbrd1/Lrp6/Magi2/Mkln1/Myo6/Napb/Nedd4/Nrg1/Nsf/Numb/Ophn1/Pacsin1/Pard3/Picalm/Pikfyve/Prkca/Ptpn5/Rab31/Ramp1/Sgip1/Sh3gl2/Sh3gl3/Smap1/Snap25/Snap91/Snca/Snx9/Sorl1/Tbc1d5/Tmem108/Trf/Usp46/…	68	endocytosis
2	GO:0048488	synaptic vesicle endocytosis	28/2318	74/28943	8.76846e-13	2.42239e-11	1.4686e-11	Amph/Bltp1/Btbd9/Cltc/Dennd1a/Dnajc6/Dnm1/Dnm2/Dnm3/Fcho2/Itsn1/Itsn2/Lrrk2/Napb/Nlgn1/Ophn1/Pacsin1/Picalm/Ppp3cc/Rock1/Sh3gl2/Sh3gl3/Slc17a7/Snap91/Snca/Ston2/Syt1/Syt7	28	endocytosis
2	GO:0140238	presynaptic endocytosis	28/2318	74/28943	8.76846e-13	2.42239e-11	1.4686e-11	Amph/Bltp1/Btbd9/Cltc/Dennd1a/Dnajc6/Dnm1/Dnm2/Dnm3/Fcho2/Itsn1/Itsn2/Lrrk2/Napb/Nlgn1/Ophn1/Pacsin1/Picalm/Ppp3cc/Rock1/Sh3gl2/Sh3gl3/Slc17a7/Snap91/Snca/Ston2/Syt1/Syt7	28	endocytosis
2	GO:0072583	clathrin-dependent endocytosis	19/2318	45/28943	4.37474e-10	7.93358e-09	4.80981e-09	Aak1/Ap2a2/Bmp2k/Cltc/Dgkd/Dnajc6/Dnm2/Fcho2/Fchsd2/Itsn1/Itsn2/Lmbrd1/Picalm/Sgip1/Sh3gl2/Sh3gl3/Smap1/Snap91/Wasl	19	endocytosis
2	GO:0048259	regulation of receptor-mediated endocytosis	33/2318	125/28943	6.11195e-10	1.08837e-08	6.59834e-09	Aak1/Ahi1/App/Atxn2/Bicd1/Bmp2k/Dgkd/Dnajc6/Dnm2/Gsg1l/Insr/Iqsec1/Magi2/Mkln1/Napb/Nedd4/Nrg1/Nsf/Numb/Ophn1/Pacsin1/Pard3/Picalm/Prkca/Ptpn5/Sh3gl2/Sh3gl3/Smap1/Snap91/Tbc1d5/Trf/Usp46/Wasl	33	endocytosis
2	GO:0045807	positive regulation of endocytosis	30/2318	127/28943	5.74419e-08	7.41476e-07	4.49528e-07	Add1/Ahi1/Amph/Ano6/App/Bicd1/Cdc42/Dcx/Dgkd/Dnm1/Dnm2/Eef2k/Insr/Itsn1/Lrrk2/Magi2/Mib1/Nlgn1/Pard3/Picalm/Pparg/Ppp3ca/Ppp3cc/Ptpn5/Rab31/Snap91/Snca/Tbc1d5/Trf/Wasl	30	endocytosis
2	GO:2000369	regulation of clathrin-dependent endocytosis	10/2318	18/28943	2.55879e-07	2.93169e-06	1.77737e-06	Aak1/Bmp2k/Dgkd/Dnajc6/Dnm2/Sh3gl2/Sh3gl3/Smap1/Snap91/Wasl	10	endocytosis
2	GO:1900242	regulation of synaptic vesicle endocytosis	10/2318	22/28943	2.80353e-06	2.46277e-05	1.49308e-05	Btbd9/Dnm1/Lrrk2/Nlgn1/Picalm/Ppp3cc/Rock1/Slc17a7/Snap91/Syt7	10	endocytosis
2	GO:0140239	postsynaptic endocytosis	11/2318	31/28943	1.59165e-05	0.000116892	7.08671e-05	Ap2a2/Dnm3/Gsg1l/Iqsec1/Myo6/Nedd4/Nrg1/Numb/Ophn1/Pacsin1/Usp46	11	endocytosis
2	GO:1900244	positive regulation of synaptic vesicle endocytosis	6/2318	12/28943	0.000158628	0.000930364	0.000564043	Dnm1/Lrrk2/Nlgn1/Picalm/Ppp3cc/Snap91	6	endocytosis
2	GO:0048260	positive regulation of receptor-mediated endocytosis	12/2318	62/28943	0.0033781	0.0126561	0.0076729	Ahi1/App/Bicd1/Dgkd/Dnm2/Insr/Magi2/Pard3/Ptpn5/Tbc1d5/Trf/Wasl	12	endocytosis
2	GO:0045806	negative regulation of endocytosis	9/2318	50/28943	0.0166723	0.0475938	0.0288543	Atxn2/Epha3/Mctp1/Pacsin1/Picalm/Pten/Rubcn/Sh3gl3/Snph	9	endocytosis
3	GO:0030100	regulation of endocytosis	11/322	236/28943	7.42616e-05	0.0044613	0.00360467	Amph/App/Bcl2l1/Iqsec1/Magi2/Nedd4/Ppp3ca/Rock1/Sh3gl2/Sh3gl3/Tbc1d5	11	endocytosis
3	GO:0048488	synaptic vesicle endocytosis	6/322	74/28943	0.000177591	0.00697636	0.00563681	Amph/Bcl2l1/Dnm3/Rock1/Sh3gl2/Sh3gl3	6	endocytosis
3	GO:0140238	presynaptic endocytosis	6/322	74/28943	0.000177591	0.00697636	0.00563681	Amph/Bcl2l1/Dnm3/Rock1/Sh3gl2/Sh3gl3	6	endocytosis
3	GO:0048259	regulation of receptor-mediated endocytosis	7/322	125/28943	0.000514071	0.013429	0.0108505	App/Iqsec1/Magi2/Nedd4/Sh3gl2/Sh3gl3/Tbc1d5	7	endocytosis
3	GO:0006898	receptor-mediated endocytosis	10/322	274/28943	0.00106658	0.018972	0.0153291	App/Dnm3/Fchsd2/Iqsec1/Magi2/Nedd4/Sgip1/Sh3gl2/Sh3gl3/Tbc1d5	10	endocytosis
3	GO:0072583	clathrin-dependent endocytosis	4/322	45/28943	0.00156413	0.0251525	0.0203229	Fchsd2/Sgip1/Sh3gl2/Sh3gl3	4	endocytosis
3	GO:0045807	positive regulation of endocytosis	6/322	127/28943	0.00303688	0.0391032	0.0315949	Amph/App/Bcl2l1/Magi2/Ppp3ca/Tbc1d5	6	endocytosis
4	GO:0045807	positive regulation of endocytosis	4/95	127/28943	0.000826863	0.0197583	0.015487	App/Magi2/Pard3/Rab31	4	endocytosis
4	GO:0048260	positive regulation of receptor-mediated endocytosis	3/95	62/28943	0.00112601	0.0228249	0.0178907	App/Magi2/Pard3	3	endocytosis
4	GO:0006898	receptor-mediated endocytosis	5/95	274/28943	0.0021235	0.0352726	0.0276474	App/Dnm3/Magi2/Pard3/Rab31	5	endocytosis
0	GO:0051092	positive regulation of NF-kappaB transcription factor activity	7/401	155/28943	0.00601047	0.0497666	0.0384928	App/Il1rap/Prkcb/Prkcq/Rps6ka5/Rtkn2/Slco3a1	7	NF-kappaB
1	GO:0051092	positive regulation of NF-kappaB transcription factor activity	6/280	155/28943	0.00408649	0.035328	0.0270464	App/Fer/Il1rap/Prkcq/Slco3a1/Trappc9	6	NF-kappaB
2	GO:0033173	calcineurin-NFAT signaling cascade	12/2318	49/28943	0.000380143	0.00197817	0.00119929	Adgrb2/Akap6/Atp2b4/Camta1/Gsk3b/Mtor/Nfat5/Nfatc3/Nrg1/Ppp3ca/Ppp3cc/Rcan2	12	NF-kappaB
2	GO:0070884	regulation of calcineurin-NFAT signaling cascade	9/2318	43/28943	0.00620498	0.0210343	0.0127523	Akap6/Atp2b4/Camta1/Gsk3b/Mtor/Nfat5/Nrg1/Ppp3ca/Ppp3cc	9	NF-kappaB
2	GO:1901224	positive regulation of NIK/NF-kappaB signaling	12/2318	69/28943	0.00821549	0.0267898	0.0162416	Ago3/App/Crebbp/Eda/Lims1/Nfat5/Nr3c2/Pdcd4/Rc3h1/Rc3h2/Smpd3/Trim44	12	NF-kappaB
2	GO:0007249	I-kappaB kinase/NF-kappaB signaling	29/2318	230/28943	0.0100923	0.0314527	0.0190685	Abl1/Abl2/Ankrd17/Ash1l/Brd4/Btrc/Dab2ip/Eda/Erc1/Fyn/Map3k7/Mid2/Myo18a/Otud7a/Peli1/Ppm1b/Prkcb/Prkce/Prkd1/Prkn/Rock1/Rock2/Rora/Tab2/Tank/Tle1/Usp25/Zfand6/Zmynd11	29	NF-kappaB
2	GO:1901222	regulation of NIK/NF-kappaB signaling	15/2318	98/28943	0.0111143	0.0344199	0.0208674	Ago3/App/Crebbp/Cyld/Eda/Fbxw11/Lims1/Nfat5/Nr3c2/Pdcd4/Ppm1b/Rc3h1/Rc3h2/Smpd3/Trim44	15	NF-kappaB
2	GO:0043124	negative regulation of I-kappaB kinase/NF-kappaB signaling	9/2318	48/28943	0.0128789	0.0383965	0.0232783	Abl1/Ash1l/Dab2ip/Otud7a/Ppm1b/Rora/Tank/Tle1/Zmynd11	9	NF-kappaB
2	GO:0038061	NIK/NF-kappaB signaling	17/2318	118/28943	0.0129058	0.0384573	0.0233151	Ago3/App/Crebbp/Cyld/Dicer1/Eda/Fbxw11/Lims1/Map3k7/Nfat5/Nr3c2/Pdcd4/Ppm1b/Rc3h1/Rc3h2/Smpd3/Trim44	17	NF-kappaB
3	GO:0070886	positive regulation of calcineurin-NFAT signaling cascade	3/322	21/28943	0.00156379	0.0251525	0.0203229	Akap6/Camta1/Ppp3ca	3	NF-kappaB
2	GO:0042987	amyloid precursor protein catabolic process	19/2318	59/28943	8.41326e-08	1.05603e-06	6.40232e-07	Adam10/Adam9/App/Chrna7/Dyrk1a/Epha4/Lrrtm3/Ntrk2/Picalm/Psen1/Ranbp9/Rock1/Rock2/Rtn1/Rtn3/Slc2a13/Sorl1/Spon1/Unc13a	19	amyloid
2	GO:0042982	amyloid precursor protein metabolic process	21/2318	74/28943	2.05143e-07	2.42076e-06	1.46761e-06	Aatf/Adam10/Adam9/App/Chrna7/Dlg1/Dyrk1a/Epha4/Lrrtm3/Ntrk2/Picalm/Psen1/Ranbp9/Rock1/Rock2/Rtn1/Rtn3/Slc2a13/Sorl1/Spon1/Unc13a	21	amyloid
2	GO:1902991	regulation of amyloid precursor protein catabolic process	15/2318	44/28943	8.40325e-07	8.55078e-06	5.184e-06	App/Chrna7/Epha4/Lrrtm3/Ntrk2/Picalm/Ranbp9/Rock1/Rock2/Rtn1/Rtn3/Slc2a13/Sorl1/Spon1/Unc13a	15	amyloid
2	GO:1902993	positive regulation of amyloid precursor protein catabolic process	9/2318	25/28943	8.34605e-05	0.000526033	0.000318913	App/Chrna7/Epha4/Lrrtm3/Picalm/Ranbp9/Rock2/Slc2a13/Spon1	9	amyloid
2	GO:1902959	regulation of aspartic-type endopeptidase activity involved in amyloid precursor protein catabolic process	5/2318	11/28943	0.00100485	0.00448017	0.00271615	App/Epha4/Picalm/Rock2/Sorl1	5	amyloid
2	GO:1902992	negative regulation of amyloid precursor protein catabolic process	7/2318	22/28943	0.00121755	0.00530445	0.00321588	Ntrk2/Picalm/Rock1/Rtn1/Rtn3/Sorl1/Spon1	7	amyloid
3	GO:0042987	amyloid precursor protein catabolic process	4/322	59/28943	0.00423122	0.0477738	0.0386006	App/Dyrk1a/Ranbp9/Rock1	4	amyloid
0	GO:0061042	vascular wound healing	3/401	16/28943	0.00129265	0.0167017	0.0129182	Adipor2/Slc12a2/Tafa5	3	wound
0	GO:0060055	angiogenesis involved in wound healing	3/401	22/28943	0.00334259	0.0323672	0.0250349	Adipor2/Slc12a2/Tafa5	3	wound
1	GO:0061042	vascular wound healing	3/280	16/28943	0.000456926	0.00815381	0.00624238	Adipor2/Slc12a2/Tafa5	3	wound
1	GO:0060055	angiogenesis involved in wound healing	3/280	22/28943	0.00120376	0.0151296	0.0115829	Adipor2/Slc12a2/Tafa5	3	wound
1	GO:0061043	regulation of vascular wound healing	2/280	10/28943	0.00398697	0.0347604	0.0266118	Slc12a2/Tafa5	2	wound
2	GO:1903034	regulation of response to wounding	34/2318	177/28943	1.48789e-06	1.42799e-05	8.65734e-06	Adamts18/Ajap1/Ano6/Arfgef1/Braf/Cask/Clasp1/Clasp2/Dmtn/Epha4/Ephb2/Igf1r/Lrig2/Map2k1/Mtor/Neo1/Nrg1/Ntrk3/Prkce/Prkg1/Pten/Ptk2/Ptn/Ptprs/Rreb1/Rtn4r/Rtn4rl1/Slc12a2/Smad3/Smoc2/Tafa5/Tnr/Ubash3b/Xylt1	34	wound
2	GO:1903035	negative regulation of response to wounding	19/2318	94/28943	0.000144131	0.000858973	0.000520761	Adamts18/Ajap1/Cask/Clasp1/Clasp2/Epha4/Lrig2/Neo1/Prkg1/Pten/Ptprs/Rtn4r/Rtn4rl1/Slc12a2/Smad3/Tafa5/Tnr/Ubash3b/Xylt1	19	wound
2	GO:0090505	epiboly involved in wound healing	9/2318	34/28943	0.00110857	0.0048873	0.00296297	Arhgap35/Clasp1/Clasp2/Mrtfa/Mtor/Pard3/Pten/Rreb1/Tmeff2	9	wound
2	GO:0042060	wound healing	46/2318	380/28943	0.00333496	0.0125262	0.00759415	Adamts18/Adipor2/Ajap1/Ano6/Ap3b1/Arfgef1/Arhgap35/Arl8b/B4galt1/Cask/Clasp1/Clasp2/Dmtn/Dst/Epb41l4b/Ephb2/Evl/Ext1/Fntb/Lyst/Macf1/Mrtfa/Mtor/Nf1/Notch2/Nrg1/Pak1/Pard3/Pik3cb/Plec/Pparg/Prkca/Prkce/Prkg1/Pten/Ptk2/Ptprj/Rreb1/Slc12a2/Smad3/Smoc2/Stxbp1/Syt7/Tafa5/Tmeff2/Ubash3b	46	wound
2	GO:0060055	angiogenesis involved in wound healing	6/2318	22/28943	0.00638014	0.0215048	0.0130375	Adipor2/B4galt1/Pik3cb/Slc12a2/Smoc2/Tafa5	6	wound
2	GO:0061041	regulation of wound healing	20/2318	137/28943	0.00643348	0.0216352	0.0131166	Adamts18/Ajap1/Ano6/Arfgef1/Cask/Clasp1/Clasp2/Dmtn/Ephb2/Mtor/Prkce/Prkg1/Pten/Ptk2/Rreb1/Slc12a2/Smad3/Smoc2/Tafa5/Ubash3b	20	wound
2	GO:1903036	positive regulation of response to wounding	13/2318	79/28943	0.00969831	0.0305468	0.0185193	Ano6/Arfgef1/Braf/Dmtn/Igf1r/Mtor/Nrg1/Ntrk3/Prkce/Ptk2/Ptn/Rreb1/Smoc2	13	wound
0	GO:0050890	cognition	21/401	358/28943	3.63668e-08	4.80431e-06	3.71597e-06	Adgrb3/Amph/App/Atp8a1/Chd7/Ctnnd2/Dgki/Grm7/Kcnab1/Ncam1/Nrxn2/Pak5/Picalm/Prkca/Prkn/Ptn/Rcan2/Slc24a2/Slc8a3/Tanc1/Tmod2	21	cognition
0	GO:0008038	neuron recognition	5/401	51/28943	0.000692897	0.0105474	0.00815809	App/Dscaml1/Ext1/Ncam1/Robo1	5	cognition
1	GO:0050890	cognition	13/280	358/28943	5.2042e-05	0.00179035	0.00137066	App/Atp8a1/Dgki/Grm7/Ncam1/Nipbl/Pak5/Prkca/Prkn/Ptn/Rcan2/Slc24a2/Tmod2	13	cognition
2	GO:0050890	cognition	109/2318	358/28943	1.2816e-35	4.45695e-33	2.70207e-33	Abi2/Abl1/Abl2/Adcy1/Adcy8/Adgrb3/Aff2/Amph/App/Atp8a1/Atxn1/Bdnf/Bhlhb9/Braf/Brinp1/Btbd9/Cacna1c/Cacna1e/Chl1/Chrna7/Cntnap2/Cpeb3/Crebbp/Crtc1/Csmd1/Ctnnd2/Cyfip1/Cyp7b1/Dgki/Dop1b/Eif2ak4/Ephb2/Fgf13/Gabra5/Gabrb3/Gpr155/Gria1/Grin1/Grin2a/Grin2b/Grm5/Grm7/Htt/Itga8/Jakmip1/Jph3/Kalrn/Kcnab1/Kmt2a/Mapt/Mecp2/Mef2c/Meis2/Mgat3/Mtor/Ncam1/Ndufs4/Neto1/Nf1/Nipbl/Nptn/Nrg1/Nrxn1/Nrxn2/Nrxn3/Ntrk2…	109	cognition
2	GO:0008038	neuron recognition	21/2318	51/28943	9.38481e-11	1.81317e-09	1.09925e-09	App/Arhgap35/Bdnf/Cntn5/Cntnap2/Crtac1/Dscam/Dscaml1/Epha3/Epha4/Ephb2/Ext1/Ncam1/Nptn/Nrcam/Nrp1/Ptprz1/Robo1/Robo2/Sema5a/Ywhaz	21	cognition
3	GO:0050890	cognition	11/322	358/28943	0.00240114	0.0341305	0.027577	Amph/App/Atp8a1/Cntnap2/Csmd1/Epm2a/Pak5/Slc24a2/Tmod2/Tusc3/Ube3a	11	cognition
4	GO:0050890	cognition	9/95	358/28943	2.82763e-06	0.000232	0.000181847	Adgrb3/App/Chd7/Cux2/Grm7/Pak5/Rcan2/Slc24a2/Slc8a3	9	cognition
4	GO:0008038	neuron recognition	3/95	51/28943	0.000636397	0.017133	0.0134292	App/Dscaml1/Robo1	3	cognition
0	GO:0007611	learning or memory	20/401	321/28943	2.86269e-08	4.07273e-06	3.15012e-06	Adgrb3/Amph/App/Atp8a1/Ctnnd2/Dgki/Grm7/Kcnab1/Ncam1/Nrxn2/Pak5/Picalm/Prkca/Prkn/Ptn/Rcan2/Slc24a2/Slc8a3/Tanc1/Tmod2	20	learning or memory
0	GO:0007612	learning	14/401	187/28943	3.90175e-07	2.88651e-05	2.23262e-05	Adgrb3/Amph/App/Atp8a1/Ctnnd2/Dgki/Grm7/Nrxn2/Pak5/Prkn/Ptn/Slc24a2/Slc8a3/Tanc1	14	learning or memory
1	GO:0007611	learning or memory	12/280	321/28943	7.65889e-05	0.00248133	0.00189966	App/Atp8a1/Dgki/Grm7/Ncam1/Pak5/Prkca/Prkn/Ptn/Rcan2/Slc24a2/Tmod2	12	learning or memory
1	GO:0007612	learning	8/280	187/28943	0.000498213	0.00861418	0.00659484	App/Atp8a1/Dgki/Grm7/Pak5/Prkn/Ptn/Slc24a2	8	learning or memory
2	GO:0007611	learning or memory	97/2318	321/28943	1.58121e-31	3.89505e-29	2.36142e-29	Abi2/Abl1/Abl2/Adcy1/Adcy8/Adgrb3/Aff2/Amph/App/Atp8a1/Atxn1/Bdnf/Bhlhb9/Braf/Brinp1/Btbd9/Cacna1c/Cacna1e/Chrna7/Cntnap2/Cpeb3/Crebbp/Crtc1/Csmd1/Ctnnd2/Cyp7b1/Dgki/Eif2ak4/Ephb2/Fgf13/Gabra5/Gabrb3/Gria1/Grin1/Grin2a/Grin2b/Grm5/Grm7/Htt/Itga8/Jph3/Kalrn/Kcnab1/Kmt2a/Mapt/Mecp2/Mef2c/Meis2/Mtor/Ncam1/Neto1/Nf1/Nptn/Nrg1/Nrxn1/Nrxn2/Nrxn3/Ntrk2/Pafah1b1/Paip2/Pak1/Pak5/Pde4d/Pde8b/Picalm/Pja2/Pl…	97	learning or memory
2	GO:0007612	learning	61/2318	187/28943	3.1239e-22	2.63836e-20	1.59953e-20	Abl2/Adgrb3/Amph/App/Atp8a1/Atxn1/Bdnf/Braf/Cacna1c/Cacna1e/Chrna7/Cntnap2/Csmd1/Ctnnd2/Dgki/Eif2ak4/Ephb2/Fgf13/Gabra5/Gabrb3/Grin1/Grin2a/Grin2b/Grm5/Grm7/Htt/Jph3/Kalrn/Kmt2a/Mecp2/Meis2/Mtor/Neto1/Nf1/Nptn/Nrxn1/Nrxn2/Nrxn3/Ntrk2/Pak1/Pak5/Pde8b/Prkn/Ptn/Sgk1/Shank1/Shank2/Shank3/Slc1a1/Slc24a2/Slc8a2/Slc8a3/Snap25/Sorcs3/Specc1/Stra6/Syngap1/Tafa2/Tanc1/Tnr/Ube3a	61	learning or memory
2	GO:0008306	associative learning	35/2318	120/28943	8.69387e-12	2.03961e-10	1.23653e-10	Abl2/App/Atxn1/Bdnf/Braf/Cacna1c/Cacna1e/Chrna7/Cntnap2/Csmd1/Gabra5/Grin1/Grin2a/Grin2b/Grm7/Htt/Kmt2a/Mecp2/Meis2/Mtor/Neto1/Nf1/Nptn/Pde8b/Sgk1/Shank1/Shank2/Shank3/Slc1a1/Snap25/Specc1/Syngap1/Tafa2/Tanc1/Tnr	35	learning or memory
2	GO:0008542	visual learning	21/2318	73/28943	1.58863e-07	1.90507e-06	1.15497e-06	Abl2/App/Atxn1/Braf/Cacna1c/Cacna1e/Grin1/Grin2a/Htt/Kmt2a/Mecp2/Meis2/Mtor/Neto1/Nf1/Nptn/Pde8b/Sgk1/Syngap1/Tafa2/Tanc1	21	learning or memory
2	GO:0098598	learned vocalization behavior or vocal learning	6/2318	10/28943	4.15053e-05	0.000279475	0.000169435	Cntnap2/Htt/Nrxn1/Nrxn2/Shank3/Stra6	6	learning or memory
3	GO:0007612	learning	9/322	187/28943	0.000262545	0.00898864	0.00726271	Amph/App/Atp8a1/Cntnap2/Csmd1/Epm2a/Pak5/Slc24a2/Ube3a	9	learning or memory
3	GO:0007611	learning or memory	10/322	321/28943	0.0033831	0.0409574	0.033093	Amph/App/Atp8a1/Cntnap2/Csmd1/Epm2a/Pak5/Slc24a2/Tmod2/Ube3a	10	learning or memory
4	GO:0007611	learning or memory	8/95	321/28943	1.10445e-05	0.000761187	0.000596636	Adgrb3/App/Cux2/Grm7/Pak5/Rcan2/Slc24a2/Slc8a3	8	learning or memory
4	GO:0007612	learning	6/95	187/28943	3.62163e-05	0.00201292	0.00157778	Adgrb3/App/Grm7/Pak5/Slc24a2/Slc8a3	6	learning or memory
