# Supplementary material for: snCED-seq: High-fidelity cryogenic enzymatic dissociation of nuclei for single-nucleus RNA-seq of FFPE tissues
Source: Research Square preprint supplement (doi:10.21203/rs.3.rs-5197301/v1), 2024-10-21
Supplement: Supplementary file 3 [file a445e660cc159ec40a18d2eb.xlsx]

## Sheet: DEGs of celltypes in AD vs. WT
supplementary Table 1: Progressive changes in DEG counts for each cell type in AD and WT. Fc>0.25; padj<0.01.
p_val	avg_log2FC	pct.1	pct.2	p_val_adj	diff	celltype	gene
2.22e-60	0.67059	0.384	0.009	5.17e-56	0.375	ExN.CA1.2	Gm36487
9.19e-39	0.50148	0.324	0.029	2.14e-34	0.295	ExN.CA1.2	1500004A13Rik
3.59e-33	0.913789	0.998	0.967	8.36e-29	0.031	ExN.CA1.2	Cadm2
7.47e-29	-0.712486	0.469	0.728	1.74e-24	-0.259	ExN.CA1.2	Tex53
1.3e-27	0.661285	0.551	0.229	3.03e-23	0.322	ExN.CA1.2	Akain1
6.25e-27	1.06707	0.849	0.606	1.45e-22	0.243	ExN.CA1.2	Cdh10
3.72e-25	0.715582	0.754	0.474	8.66e-21	0.28	ExN.CA1.2	Gm10125
5.32e-25	0.707702	0.998	0.944	1.24e-20	0.054	ExN.CA1.2	Dscam
2.4e-24	0.794952	0.946	0.78	5.59e-20	0.166	ExN.CA1.2	Cacng3
1.96e-23	0.537784	0.406	0.145	4.56e-19	0.261	ExN.CA1.2	Thy1
1.07e-22	0.743891	0.987	0.869	2.48e-18	0.118	ExN.CA1.2	Sgcz
1.32e-22	0.670832	0.998	0.967	3.07e-18	0.031	ExN.CA1.2	Il1rapl1
1.35e-22	0.639788	0.994	0.955	3.14e-18	0.039	ExN.CA1.2	Adgrl3
1.61e-22	0.833782	0.989	0.933	3.73e-18	0.056	ExN.CA1.2	Hs6st3
4.39e-22	0.656627	1	0.993	1.02e-17	0.007	ExN.CA1.2	Nlgn1
4.75e-22	0.693162	0.937	0.777	1.1e-17	0.16	ExN.CA1.2	Galnt13
6.2e-22	0.64784	1	0.984	1.44e-17	0.016	ExN.CA1.2	Ralyl
1.22e-21	0.718559	0.913	0.704	2.83e-17	0.209	ExN.CA1.2	Tshz2
1.34e-21	0.630841	1	0.991	3.1e-17	0.009	ExN.CA1.2	Magi2
1.81e-21	0.730661	0.997	0.98	4.22e-17	0.017	ExN.CA1.2	Ctnna2
2.47e-21	-0.658691	0.506	0.695	5.75e-17	-0.189	ExN.CA1.2	Miat
4.6e-21	0.516026	0.924	0.753	1.07e-16	0.171	ExN.CA1.2	Bckdhb
7.1e-21	0.769985	0.983	0.913	1.65e-16	0.07	ExN.CA1.2	Chrm3
1.62e-20	0.69882	0.854	0.646	3.76e-16	0.208	ExN.CA1.2	Klf12
2.22e-20	0.740267	0.998	1	5.16e-16	-0.002	ExN.CA1.2	Lsamp
2.33e-20	0.615852	1	0.996	5.41e-16	0.004	ExN.CA1.2	Ptprd
2.52e-20	0.648186	0.998	0.967	5.86e-16	0.031	ExN.CA1.2	Astn2
2.9e-20	0.721921	0.959	0.844	6.75e-16	0.115	ExN.CA1.2	Wwox
4.71e-20	0.616776	1	0.982	1.09e-15	0.018	ExN.CA1.2	Lingo2
6.38e-20	-0.46276	0.195	0.428	1.48e-15	-0.233	ExN.CA1.2	Rn7sk
8.57e-20	0.607082	0.986	0.944	1.99e-15	0.042	ExN.CA1.2	Rgs7
1.29e-19	0.716902	0.961	0.833	3e-15	0.128	ExN.CA1.2	Marchf1
1.31e-19	0.58347	0.989	0.898	3.05e-15	0.091	ExN.CA1.2	Epha5
1.77e-19	-0.576285	0.507	0.713	4.12e-15	-0.206	ExN.CA1.2	Cacna1h
2.42e-19	0.608319	0.997	0.973	5.63e-15	0.024	ExN.CA1.2	Kcnd2
2.68e-19	0.705928	0.75	0.51	6.22e-15	0.24	ExN.CA1.2	Cdh18
4.58e-19	0.59441	0.636	0.394	1.06e-14	0.242	ExN.CA1.2	Epha3
5.98e-19	-0.572375	1	1	1.39e-14	0	ExN.CA1.2	Meg3
6.09e-19	1.11329	0.78	0.541	1.42e-14	0.239	ExN.CA1.2	Inpp4b
1.22e-18	0.829533	0.792	0.561	2.84e-14	0.231	ExN.CA1.2	Cdh20
1.38e-18	0.674457	0.776	0.539	3.21e-14	0.237	ExN.CA1.2	Alcam
2.06e-18	0.639919	0.616	0.354	4.78e-14	0.262	ExN.CA1.2	Grb14
2.06e-18	-0.658292	0.995	0.993	4.8e-14	0.002	ExN.CA1.2	Malat1
2.37e-18	0.575948	0.98	0.88	5.51e-14	0.1	ExN.CA1.2	Lrrtm3
3.1e-18	0.578242	0.994	0.951	7.22e-14	0.043	ExN.CA1.2	Shisa6
3.18e-18	0.610497	0.983	0.927	7.4e-14	0.056	ExN.CA1.2	Rit2
3.5e-18	0.617178	0.98	0.913	8.14e-14	0.067	ExN.CA1.2	Kcnb2
3.86e-18	0.643909	0.956	0.855	8.98e-14	0.101	ExN.CA1.2	D430041D05Rik
4.32e-18	0.653843	0.997	0.996	1.01e-13	0.001	ExN.CA1.2	Nrxn3
6.84e-18	0.875066	0.992	0.953	1.59e-13	0.039	ExN.CA1.2	Pcdh9
8.06e-18	0.490622	0.945	0.777	1.87e-13	0.168	ExN.CA1.2	Samd5
8.16e-18	0.535298	0.997	0.955	1.9e-13	0.042	ExN.CA1.2	Ppfia2
8.58e-18	0.504378	0.992	0.947	1.99e-13	0.045	ExN.CA1.2	Dgki
1.21e-17	0.551928	0.97	0.875	2.81e-13	0.095	ExN.CA1.2	Gabrb2
2.39e-17	0.64306	0.957	0.844	5.57e-13	0.113	ExN.CA1.2	Tmeff2
3.01e-17	0.65302	0.987	0.927	7e-13	0.06	ExN.CA1.2	Ncam2
3.49e-17	0.518361	0.962	0.822	8.11e-13	0.14	ExN.CA1.2	Fat3
5.7e-17	0.591672	0.998	0.969	1.32e-12	0.029	ExN.CA1.2	Cntn4
6.04e-17	0.485748	1	0.962	1.41e-12	0.038	ExN.CA1.2	Grik2
6.82e-17	0.515381	0.794	0.624	1.59e-12	0.17	ExN.CA1.2	Drc1
6.82e-17	-0.526971	0.633	0.744	1.59e-12	-0.111	ExN.CA1.2	Leng8
8.95e-17	0.471944	0.937	0.777	2.08e-12	0.16	ExN.CA1.2	Diaph2
1.3e-16	0.440797	0.948	0.806	3.02e-12	0.142	ExN.CA1.2	Faf1
1.31e-16	0.496302	0.984	0.929	3.04e-12	0.055	ExN.CA1.2	Exoc4
1.83e-16	0.50849	1	0.996	4.25e-12	0.004	ExN.CA1.2	Grin2a
2.12e-16	0.479495	0.989	0.927	4.92e-12	0.062	ExN.CA1.2	Nebl
2.13e-16	0.779314	0.935	0.808	4.96e-12	0.127	ExN.CA1.2	Brinp3
2.44e-16	0.445922	0.975	0.855	5.67e-12	0.12	ExN.CA1.2	Ccdc85a
3.6e-16	-0.50273	0.436	0.606	8.36e-12	-0.17	ExN.CA1.2	Tspoap1
3.67e-16	0.525368	0.924	0.759	8.53e-12	0.165	ExN.CA1.2	Immp2l
3.68e-16	-0.574466	0.849	0.92	8.55e-12	-0.071	ExN.CA1.2	Adgrb1
4.77e-16	-0.567371	0.898	0.929	1.11e-11	-0.031	ExN.CA1.2	Srrm2
6.45e-16	0.507921	1	0.996	1.5e-11	0.004	ExN.CA1.2	Nrg3
8.25e-16	0.540638	0.998	0.984	1.92e-11	0.014	ExN.CA1.2	Macrod2
8.94e-16	0.499451	0.754	0.512	2.08e-11	0.242	ExN.CA1.2	Elfn1
9.23e-16	0.60235	0.995	0.969	2.15e-11	0.026	ExN.CA1.2	Dmd
1.02e-15	0.385208	0.969	0.84	2.38e-11	0.129	ExN.CA1.2	Fmn2
1.36e-15	0.578236	0.991	0.949	3.16e-11	0.042	ExN.CA1.2	Csmd3
1.5e-15	0.65548	0.597	0.345	3.48e-11	0.252	ExN.CA1.2	Gm41414
1.57e-15	0.493566	1	0.998	3.66e-11	0.002	ExN.CA1.2	Rbfox1
2.02e-15	0.562133	0.953	0.826	4.7e-11	0.127	ExN.CA1.2	Sema6d
2.05e-15	0.565591	0.948	0.802	4.76e-11	0.146	ExN.CA1.2	Unc5c
3.38e-15	0.528311	0.613	0.392	7.87e-11	0.221	ExN.CA1.2	Gm4258
3.54e-15	0.483381	1	0.98	8.24e-11	0.02	ExN.CA1.2	Mdga2
3.57e-15	0.53577	0.939	0.82	8.31e-11	0.119	ExN.CA1.2	Fut9
3.61e-15	0.488042	1	0.991	8.39e-11	0.009	ExN.CA1.2	Adgrb3
3.81e-15	0.583291	0.685	0.468	8.86e-11	0.217	ExN.CA1.2	Gprin3
3.87e-15	0.482788	0.661	0.414	8.99e-11	0.247	ExN.CA1.2	Ppp1r14c
4.26e-15	0.462434	0.945	0.811	9.91e-11	0.134	ExN.CA1.2	Arl15
4.34e-15	0.811036	0.701	0.506	1.01e-10	0.195	ExN.CA1.2	Plcl1
4.54e-15	0.491672	1	0.987	1.05e-10	0.013	ExN.CA1.2	Frmd4a
4.6e-15	-0.46147	0.778	0.795	1.07e-10	-0.017	ExN.CA1.2	Syngap1
4.65e-15	0.78902	0.535	0.296	1.08e-10	0.239	ExN.CA1.2	Trabd2b
4.69e-15	0.490594	0.937	0.788	1.09e-10	0.149	ExN.CA1.2	Asap1
4.95e-15	0.521916	0.997	0.971	1.15e-10	0.026	ExN.CA1.2	Frmpd4
5.01e-15	0.514081	1	1	1.17e-10	0	ExN.CA1.2	Lrrtm4
5.24e-15	0.537102	0.85	0.653	1.22e-10	0.197	ExN.CA1.2	Slc35f4
5.54e-15	0.714539	0.951	0.878	1.29e-10	0.073	ExN.CA1.2	Cntnap5a
5.61e-15	0.485418	0.78	0.577	1.3e-10	0.203	ExN.CA1.2	Ttll7
6.78e-15	0.427251	0.887	0.706	1.58e-10	0.181	ExN.CA1.2	Fer
7.23e-15	0.600358	0.85	0.659	1.68e-10	0.191	ExN.CA1.2	Kctd8
9.02e-15	-0.497916	0.567	0.699	2.1e-10	-0.132	ExN.CA1.2	Dgkz
9.55e-15	0.461984	0.783	0.559	2.22e-10	0.224	ExN.CA1.2	Pard3
1.1e-14	0.375904	0.975	0.862	2.55e-10	0.113	ExN.CA1.2	Sobp
1.1e-14	0.391633	0.907	0.728	2.57e-10	0.179	ExN.CA1.2	Ppm1l
1.18e-14	0.407187	0.811	0.597	2.74e-10	0.214	ExN.CA1.2	Lmbr1
1.19e-14	0.495118	0.899	0.748	2.77e-10	0.151	ExN.CA1.2	2610035D17Rik
1.42e-14	0.374355	0.899	0.715	3.3e-10	0.184	ExN.CA1.2	Apba1
1.43e-14	0.410064	0.759	0.53	3.31e-10	0.229	ExN.CA1.2	Sybu
1.67e-14	0.406777	0.863	0.675	3.88e-10	0.188	ExN.CA1.2	Gsk3b
2.19e-14	0.381845	0.983	0.88	5.1e-10	0.103	ExN.CA1.2	Ano4
2.8e-14	0.471432	0.894	0.735	6.51e-10	0.159	ExN.CA1.2	Clvs1
3.34e-14	-0.494286	0.641	0.724	7.76e-10	-0.083	ExN.CA1.2	Celf5
3.38e-14	0.462997	1	0.996	7.87e-10	0.004	ExN.CA1.2	Dlgap1
4.27e-14	0.652928	0.942	0.871	9.92e-10	0.071	ExN.CA1.2	Kctd16
4.52e-14	0.632822	0.986	0.927	1.05e-09	0.059	ExN.CA1.2	Ntm
4.52e-14	0.491349	0.997	0.989	1.05e-09	0.008	ExN.CA1.2	Syt1
4.59e-14	0.412143	0.967	0.869	1.07e-09	0.098	ExN.CA1.2	Akap6
4.66e-14	0.370378	0.546	0.31	1.08e-09	0.236	ExN.CA1.2	Gm48743
5.08e-14	0.494809	0.894	0.733	1.18e-09	0.161	ExN.CA1.2	Vsnl1
5.79e-14	-0.4145	0.332	0.543	1.35e-09	-0.211	ExN.CA1.2	Nisch
6.51e-14	0.686837	0.764	0.57	1.51e-09	0.194	ExN.CA1.2	Grm1
7.16e-14	0.398758	0.921	0.762	1.67e-09	0.159	ExN.CA1.2	Stk39
7.83e-14	0.579317	0.874	0.737	1.82e-09	0.137	ExN.CA1.2	Robo2
9.12e-14	-0.344972	0.183	0.385	2.12e-09	-0.202	ExN.CA1.2	Myo15a
1.28e-13	0.497738	0.69	0.47	2.97e-09	0.22	ExN.CA1.2	Lekr1
1.3e-13	0.421956	0.866	0.69	3.02e-09	0.176	ExN.CA1.2	Cdkal1
1.41e-13	0.45549	0.698	0.492	3.27e-09	0.206	ExN.CA1.2	Prkaa2
1.42e-13	0.420443	0.742	0.526	3.31e-09	0.216	ExN.CA1.2	Dennd1b
1.55e-13	0.451585	1	0.998	3.6e-09	0.002	ExN.CA1.2	Csmd1
1.64e-13	0.573817	0.989	0.962	3.82e-09	0.027	ExN.CA1.2	Kcnq5
1.81e-13	0.480662	0.976	0.88	4.2e-09	0.096	ExN.CA1.2	Chsy3
1.84e-13	0.474342	0.995	0.951	4.28e-09	0.044	ExN.CA1.2	Plcb1
2.33e-13	0.467036	0.997	0.996	5.41e-09	0.001	ExN.CA1.2	Fgf14
2.85e-13	0.414549	0.997	0.958	6.63e-09	0.039	ExN.CA1.2	Ryr2
2.89e-13	0.62114	0.773	0.592	6.72e-09	0.181	ExN.CA1.2	Epha7
3e-13	0.459231	0.978	0.929	6.97e-09	0.049	ExN.CA1.2	Dync1i1
3.08e-13	0.503189	0.989	0.944	7.16e-09	0.045	ExN.CA1.2	Plxna4
3.2e-13	-0.430079	0.754	0.788	7.43e-09	-0.034	ExN.CA1.2	Sptan1
3.37e-13	-0.321754	0.164	0.35	7.84e-09	-0.186	ExN.CA1.2	Ddx39b
3.5e-13	0.327174	0.277	0.105	8.15e-09	0.172	ExN.CA1.2	Nsdhl
4.13e-13	0.485777	0.995	0.96	9.6e-09	0.035	ExN.CA1.2	Gabrb1
4.28e-13	0.48328	0.438	0.22	9.94e-09	0.218	ExN.CA1.2	Syt2
4.66e-13	-0.440839	0.491	0.628	1.08e-08	-0.137	ExN.CA1.2	Celsr3
5.04e-13	0.652187	0.969	0.918	1.17e-08	0.051	ExN.CA1.2	Egfem1
5.37e-13	0.453594	0.431	0.216	1.25e-08	0.215	ExN.CA1.2	Mctp2
5.75e-13	0.33583	0.983	0.889	1.34e-08	0.094	ExN.CA1.2	Samd12
6.45e-13	0.521906	0.912	0.784	1.5e-08	0.128	ExN.CA1.2	Sorbs2
6.53e-13	-0.394229	0.321	0.486	1.52e-08	-0.165	ExN.CA1.2	Snrnp70
6.62e-13	0.440384	0.661	0.439	1.54e-08	0.222	ExN.CA1.2	Gm9866
6.97e-13	0.554867	0.885	0.726	1.62e-08	0.159	ExN.CA1.2	Zfpm2
7.15e-13	0.37232	0.928	0.782	1.66e-08	0.146	ExN.CA1.2	Jakmip2
8.51e-13	0.400595	0.984	0.904	1.98e-08	0.08	ExN.CA1.2	Tspan5
9.35e-13	-0.451078	0.279	0.479	2.17e-08	-0.2	ExN.CA1.2	Cpne7
9.56e-13	0.461334	0.55	0.327	2.22e-08	0.223	ExN.CA1.2	Olfm2
1.08e-12	0.473148	0.652	0.441	2.51e-08	0.211	ExN.CA1.2	Jdp2
1.12e-12	0.324482	0.835	0.639	2.59e-08	0.196	ExN.CA1.2	Cdk13
1.33e-12	0.381616	0.921	0.782	3.09e-08	0.139	ExN.CA1.2	Fam172a
1.44e-12	0.460349	0.819	0.664	3.34e-08	0.155	ExN.CA1.2	Acaca
1.49e-12	0.362057	0.83	0.639	3.47e-08	0.191	ExN.CA1.2	Carmil1
1.57e-12	0.396785	0.991	0.935	3.66e-08	0.056	ExN.CA1.2	Cacnb4
1.69e-12	0.494801	0.828	0.673	3.92e-08	0.155	ExN.CA1.2	Klhl32
1.75e-12	0.501781	0.989	0.938	4.07e-08	0.051	ExN.CA1.2	Sox5
1.78e-12	-0.455248	0.524	0.633	4.13e-08	-0.109	ExN.CA1.2	Mirg
1.86e-12	0.532795	0.444	0.238	4.33e-08	0.206	ExN.CA1.2	Adamts3
2.05e-12	0.379111	0.987	0.924	4.77e-08	0.063	ExN.CA1.2	Gphn
2.06e-12	0.485974	0.973	0.909	4.78e-08	0.064	ExN.CA1.2	Xkr4
2.1e-12	0.168224	0.655	0.45	4.88e-08	0.205	ExN.CA1.2	Tshz3
2.29e-12	0.457731	0.767	0.59	5.33e-08	0.177	ExN.CA1.2	Gabra1
2.63e-12	0.509624	0.846	0.677	6.11e-08	0.169	ExN.CA1.2	Nyap2
2.66e-12	0.365048	0.981	0.902	6.19e-08	0.079	ExN.CA1.2	Mbd5
2.91e-12	0.215729	0.976	0.864	6.77e-08	0.112	ExN.CA1.2	Mllt10
3.18e-12	0.417622	0.926	0.806	7.38e-08	0.12	ExN.CA1.2	Epb41l3
3.21e-12	0.599619	0.987	0.971	7.45e-08	0.016	ExN.CA1.2	Ptprt
3.3e-12	0.415487	0.997	0.971	7.66e-08	0.026	ExN.CA1.2	Cadps
3.53e-12	0.510812	0.819	0.65	8.22e-08	0.169	ExN.CA1.2	ENSMUSG00000120285
3.67e-12	0.420371	0.288	0.118	8.54e-08	0.17	ExN.CA1.2	Gm15645
3.76e-12	-0.426041	0.54	0.664	8.75e-08	-0.124	ExN.CA1.2	Adgrb2
3.88e-12	0.31697	0.91	0.753	9.02e-08	0.157	ExN.CA1.2	Dnajc6
4.22e-12	0.432517	0.767	0.566	9.8e-08	0.201	ExN.CA1.2	Marchf11
4.33e-12	0.268906	0.82	0.624	1.01e-07	0.196	ExN.CA1.2	Ascc3
4.6e-12	0.449572	0.913	0.782	1.07e-07	0.131	ExN.CA1.2	Smyd3
5.32e-12	0.509106	0.843	0.697	1.24e-07	0.146	ExN.CA1.2	Mmp16
5.51e-12	-0.26738	0.096	0.254	1.28e-07	-0.158	ExN.CA1.2	Gdi1
5.63e-12	0.400351	0.827	0.646	1.31e-07	0.181	ExN.CA1.2	Zeb1
5.99e-12	0.726348	0.665	0.477	1.39e-07	0.188	ExN.CA1.2	A330008L17Rik
6.5e-12	0.445778	1	0.982	1.51e-07	0.018	ExN.CA1.2	Nkain2
7.03e-12	0.474288	0.981	0.931	1.64e-07	0.05	ExN.CA1.2	Cacna1c
7.14e-12	0.453949	0.852	0.702	1.66e-07	0.15	ExN.CA1.2	Slc22a23
7.21e-12	0.347149	0.998	0.947	1.68e-07	0.051	ExN.CA1.2	Ntng1
7.26e-12	0.419628	0.97	0.895	1.69e-07	0.075	ExN.CA1.2	Cdk14
9.53e-12	0.397951	0.89	0.751	2.22e-07	0.139	ExN.CA1.2	Fars2
9.8e-12	0.532829	0.836	0.677	2.28e-07	0.159	ExN.CA1.2	Cntn6
1.02e-11	0.189438	0.548	0.35	2.37e-07	0.198	ExN.CA1.2	Rxfp1
1.03e-11	-0.361143	0.227	0.396	2.41e-07	-0.169	ExN.CA1.2	Zer1
1.11e-11	0.376741	0.964	0.878	2.59e-07	0.086	ExN.CA1.2	St8sia5
1.13e-11	0.445438	0.827	0.657	2.63e-07	0.17	ExN.CA1.2	Sash1
1.28e-11	0.428137	1	0.998	2.98e-07	0.002	ExN.CA1.2	Nrxn1
1.32e-11	0.408585	1	0.971	3.07e-07	0.029	ExN.CA1.2	Auts2
1.35e-11	-0.348243	0.183	0.339	3.14e-07	-0.156	ExN.CA1.2	Mbd6
1.36e-11	-0.266571	0.894	0.826	3.17e-07	0.068	ExN.CA1.2	R3hdm2
1.49e-11	0.411835	0.871	0.715	3.47e-07	0.156	ExN.CA1.2	Pvt1
1.52e-11	-0.312519	0.169	0.339	3.54e-07	-0.17	ExN.CA1.2	Per1
1.6e-11	0.548935	0.668	0.474	3.73e-07	0.194	ExN.CA1.2	Gm26691
2.37e-11	0.22782	0.984	0.891	5.5e-07	0.093	ExN.CA1.2	Dip2c
2.38e-11	0.424466	0.959	0.878	5.54e-07	0.081	ExN.CA1.2	Csrnp3
2.48e-11	-0.441788	0.526	0.67	5.77e-07	-0.144	ExN.CA1.2	Kmt2d
2.64e-11	0.390349	0.951	0.862	6.14e-07	0.089	ExN.CA1.2	Vps13b
2.73e-11	0.34218	0.353	0.165	6.35e-07	0.188	ExN.CA1.2	Hs3st5
2.74e-11	0.36551	0.998	0.971	6.37e-07	0.027	ExN.CA1.2	Dclk1
2.77e-11	0.419964	0.82	0.65	6.45e-07	0.17	ExN.CA1.2	Tfdp2
2.85e-11	0.526825	0.891	0.804	6.62e-07	0.087	ExN.CA1.2	Gm10649
2.86e-11	0.373843	0.951	0.84	6.66e-07	0.111	ExN.CA1.2	Ankrd33b
2.89e-11	0.395912	0.754	0.561	6.72e-07	0.193	ExN.CA1.2	Pals2
3e-11	-0.207421	0.05	0.18	6.97e-07	-0.13	ExN.CA1.2	Dtx3
3.04e-11	0.407871	0.742	0.557	7.07e-07	0.185	ExN.CA1.2	Mbnl1
3.09e-11	0.536479	1	0.996	7.17e-07	0.004	ExN.CA1.2	Kcnip4
3.19e-11	0.377916	0.869	0.713	7.42e-07	0.156	ExN.CA1.2	Gmds
3.42e-11	-0.327677	0.789	0.777	7.94e-07	0.012	ExN.CA1.2	Adgrl1
3.5e-11	0.372335	0.902	0.755	8.13e-07	0.147	ExN.CA1.2	Lpp
3.55e-11	0.403004	0.737	0.543	8.25e-07	0.194	ExN.CA1.2	Elovl6
3.59e-11	0.579126	0.739	0.557	8.34e-07	0.182	ExN.CA1.2	Pam
3.65e-11	0.491058	0.896	0.753	8.5e-07	0.143	ExN.CA1.2	Prkca
3.74e-11	0.383566	0.954	0.86	8.7e-07	0.094	ExN.CA1.2	Rabgap1l
3.88e-11	0.402662	0.69	0.494	9.02e-07	0.196	ExN.CA1.2	Sh3kbp1
3.93e-11	0.461303	0.773	0.601	9.14e-07	0.172	ExN.CA1.2	Dlc1
3.93e-11	0.431732	0.98	0.913	9.15e-07	0.067	ExN.CA1.2	Slc35f1
4.37e-11	0.425555	0.987	0.944	1.02e-06	0.043	ExN.CA1.2	Prickle2
4.41e-11	0.327499	0.792	0.599	1.03e-06	0.193	ExN.CA1.2	Rbms1
4.74e-11	0.40394	0.994	0.962	1.1e-06	0.032	ExN.CA1.2	Zfp385b
4.85e-11	0.602608	0.85	0.713	1.13e-06	0.137	ExN.CA1.2	Cdh8
5.03e-11	-0.439123	0.411	0.523	1.17e-06	-0.112	ExN.CA1.2	Gm17167
5.34e-11	0.399221	0.806	0.641	1.24e-06	0.165	ExN.CA1.2	Mtmr1
5.43e-11	-0.371749	0.433	0.561	1.26e-06	-0.128	ExN.CA1.2	Ndrg4
5.85e-11	0.621836	0.657	0.461	1.36e-06	0.196	ExN.CA1.2	Htr1f
6.06e-11	0.425522	0.465	0.267	1.41e-06	0.198	ExN.CA1.2	Hrh2
7.27e-11	0.388555	0.792	0.615	1.69e-06	0.177	ExN.CA1.2	Mbp
7.64e-11	0.426754	0.998	0.982	1.78e-06	0.016	ExN.CA1.2	Hcn1
7.78e-11	0.365822	0.863	0.699	1.81e-06	0.164	ExN.CA1.2	Gabra2
7.89e-11	0.406747	0.973	0.913	1.84e-06	0.06	ExN.CA1.2	Fbxl17
7.92e-11	0.327056	0.565	0.356	1.84e-06	0.209	ExN.CA1.2	Arhgap42
8.55e-11	0.692924	0.942	0.831	1.99e-06	0.111	ExN.CA1.2	Tenm3
8.71e-11	0.318747	0.931	0.804	2.03e-06	0.127	ExN.CA1.2	Hspa12a
1.06e-10	0.395861	0.904	0.802	2.46e-06	0.102	ExN.CA1.2	Ube2w
1.1e-10	0.346579	0.928	0.806	2.56e-06	0.122	ExN.CA1.2	Tbc1d5
1.1e-10	-0.256529	0.137	0.301	2.56e-06	-0.164	ExN.CA1.2	Camkv
1.16e-10	0.294672	0.306	0.143	2.69e-06	0.163	ExN.CA1.2	Vmn2r85
1.32e-10	0.407344	0.773	0.601	3.07e-06	0.172	ExN.CA1.2	Igf1r
1.35e-10	0.482715	0.995	0.982	3.14e-06	0.013	ExN.CA1.2	Ccser1
1.46e-10	0.254962	0.569	0.367	3.39e-06	0.202	ExN.CA1.2	Dpy19l1
1.46e-10	0.44793	0.819	0.679	3.39e-06	0.14	ExN.CA1.2	Hmgcll1
1.63e-10	0.382294	0.91	0.782	3.79e-06	0.128	ExN.CA1.2	Upp2
1.67e-10	0.307159	0.817	0.637	3.89e-06	0.18	ExN.CA1.2	Gnai1
1.68e-10	0.31911	0.753	0.561	3.89e-06	0.192	ExN.CA1.2	Chm
2.15e-10	0.363363	0.91	0.78	5e-06	0.13	ExN.CA1.2	Cap2
2.21e-10	0.418447	0.89	0.768	5.14e-06	0.122	ExN.CA1.2	Hecw1
2.3e-10	0.635345	0.614	0.441	5.35e-06	0.173	ExN.CA1.2	Lhfpl3
2.44e-10	0.401998	0.961	0.891	5.67e-06	0.07	ExN.CA1.2	Adcy2
2.5e-10	0.384482	0.957	0.898	5.81e-06	0.059	ExN.CA1.2	Adam22
2.65e-10	-0.366642	0.428	0.535	6.16e-06	-0.107	ExN.CA1.2	Akap8l
3e-10	-0.233188	0.071	0.183	6.96e-06	-0.112	ExN.CA1.2	Rnf112
3.04e-10	0.300487	0.63	0.428	7.06e-06	0.202	ExN.CA1.2	Fnip2
3.09e-10	0.290483	0.898	0.746	7.18e-06	0.152	ExN.CA1.2	Nrp1
3.2e-10	0.338357	0.65	0.459	7.44e-06	0.191	ExN.CA1.2	Gm14410
3.3e-10	-0.404194	0.707	0.786	7.67e-06	-0.079	ExN.CA1.2	Pkd1
3.3e-10	0.381042	0.972	0.915	7.67e-06	0.057	ExN.CA1.2	A230006K03Rik
3.35e-10	0.449761	0.619	0.419	7.78e-06	0.2	ExN.CA1.2	Ptchd4
3.38e-10	-0.335685	0.214	0.361	7.86e-06	-0.147	ExN.CA1.2	Chd3
3.4e-10	0.318716	0.987	0.924	7.91e-06	0.063	ExN.CA1.2	Map2
3.42e-10	0.524621	0.435	0.256	7.94e-06	0.179	ExN.CA1.2	Cdh9
3.52e-10	0.506748	0.773	0.599	8.18e-06	0.174	ExN.CA1.2	Rspo2
3.61e-10	0.36174	0.557	0.37	8.39e-06	0.187	ExN.CA1.2	Cfap299
3.83e-10	0.299924	0.528	0.327	8.91e-06	0.201	ExN.CA1.2	Phtf2
3.86e-10	0.329516	0.902	0.762	8.98e-06	0.14	ExN.CA1.2	Pak5
4.13e-10	0.327197	0.496	0.298	9.6e-06	0.198	ExN.CA1.2	Mipol1
4.13e-10	0.502301	0.972	0.915	9.6e-06	0.057	ExN.CA1.2	Clstn2
4.15e-10	-0.367383	0.439	0.566	9.65e-06	-0.127	ExN.CA1.2	Lmtk3
4.21e-10	-0.428726	0.769	0.851	9.79e-06	-0.082	ExN.CA1.2	Prkcg
4.38e-10	0.381733	0.994	0.96	1.02e-05	0.034	ExN.CA1.2	Ryr3
4.4e-10	-0.371463	0.764	0.786	1.02e-05	-0.022	ExN.CA1.2	Sptbn2
4.46e-10	0.38964	0.986	0.944	1.04e-05	0.042	ExN.CA1.2	Ppp3ca
4.49e-10	-0.336226	0.302	0.479	1.04e-05	-0.177	ExN.CA1.2	Szt2
4.77e-10	0.356676	0.973	0.9	1.11e-05	0.073	ExN.CA1.2	Sgip1
4.83e-10	0.357018	0.636	0.441	1.12e-05	0.195	ExN.CA1.2	Etv6
5.15e-10	-0.299818	0.236	0.385	1.2e-05	-0.149	ExN.CA1.2	Kmt2b
5.22e-10	0.434152	0.71	0.581	1.21e-05	0.129	ExN.CA1.2	Mblac2
5.35e-10	0.246108	0.94	0.815	1.24e-05	0.125	ExN.CA1.2	2210408F21Rik
5.75e-10	0.344114	0.608	0.43	1.34e-05	0.178	ExN.CA1.2	Ndufs4
5.97e-10	-0.325518	0.891	0.866	1.39e-05	0.025	ExN.CA1.2	Nrxn2
6.09e-10	0.342111	0.951	0.857	1.42e-05	0.094	ExN.CA1.2	Specc1
6.14e-10	0.405792	0.885	0.768	1.43e-05	0.117	ExN.CA1.2	Med12l
6.16e-10	0.347956	0.65	0.459	1.43e-05	0.191	ExN.CA1.2	Glrb
6.37e-10	-0.357353	0.269	0.432	1.48e-05	-0.163	ExN.CA1.2	Clcn2
6.44e-10	0.372029	0.778	0.612	1.5e-05	0.166	ExN.CA1.2	Adk
6.52e-10	0.395698	0.532	0.363	1.52e-05	0.169	ExN.CA1.2	Ppp2r3a
7.25e-10	0.377016	0.255	0.102	1.68e-05	0.153	ExN.CA1.2	Sv2c
7.36e-10	0.472576	0.976	0.931	1.71e-05	0.045	ExN.CA1.2	Zmat4
7.81e-10	0.374771	0.559	0.37	1.82e-05	0.189	ExN.CA1.2	Larp1b
8.23e-10	-0.300602	0.222	0.396	1.91e-05	-0.174	ExN.CA1.2	Eno2
8.96e-10	0.338208	0.701	0.519	2.08e-05	0.182	ExN.CA1.2	Faxc
9.07e-10	0.340273	0.954	0.86	2.11e-05	0.094	ExN.CA1.2	Gpm6a
9.5e-10	0.361907	0.63	0.472	2.21e-05	0.158	ExN.CA1.2	Gm19465
1.02e-09	-0.287347	0.165	0.321	2.36e-05	-0.156	ExN.CA1.2	Prrc2a
1.02e-09	0.452882	0.556	0.37	2.37e-05	0.186	ExN.CA1.2	Prkd1
1.04e-09	0.37546	0.757	0.579	2.43e-05	0.178	ExN.CA1.2	Kctd1
1.06e-09	-0.289421	0.172	0.332	2.47e-05	-0.16	ExN.CA1.2	Atp8b2
1.09e-09	0.285302	0.627	0.43	2.54e-05	0.197	ExN.CA1.2	Ctnna3
1.11e-09	-0.362666	0.468	0.597	2.59e-05	-0.129	ExN.CA1.2	Speg
1.19e-09	-0.193167	0.443	0.347	2.78e-05	0.096	ExN.CA1.2	Fn1
1.27e-09	-0.348038	0.309	0.479	2.96e-05	-0.17	ExN.CA1.2	Celf3
1.27e-09	0.425783	0.868	0.757	2.96e-05	0.111	ExN.CA1.2	Aig1
1.28e-09	0.354356	0.928	0.808	2.98e-05	0.12	ExN.CA1.2	Cacna2d1
1.55e-09	0.18337	0.167	0.051	3.61e-05	0.116	ExN.CA1.2	ENSMUSG00000120021
1.58e-09	0.315726	0.806	0.641	3.67e-05	0.165	ExN.CA1.2	Dync2h1
1.63e-09	0.377169	0.698	0.523	3.8e-05	0.175	ExN.CA1.2	Cblb
1.65e-09	0.337309	0.512	0.33	3.85e-05	0.182	ExN.CA1.2	Emc2
1.7e-09	-0.297652	0.167	0.305	3.96e-05	-0.138	ExN.CA1.2	Crocc
1.77e-09	0.377613	0.759	0.59	4.11e-05	0.169	ExN.CA1.2	Nopchap1
1.93e-09	-0.361498	0.357	0.483	4.48e-05	-0.126	ExN.CA1.2	Plxna1
2.03e-09	0.412515	0.989	0.971	4.72e-05	0.018	ExN.CA1.2	Msra
2.08e-09	0.367307	0.838	0.693	4.85e-05	0.145	ExN.CA1.2	Snx25
2.09e-09	0.389832	0.992	0.98	4.87e-05	0.012	ExN.CA1.2	Myt1l
2.14e-09	-0.350815	0.258	0.383	4.98e-05	-0.125	ExN.CA1.2	Traip
2.25e-09	0.245463	0.869	0.715	5.23e-05	0.154	ExN.CA1.2	Fyn
2.25e-09	0.323294	0.786	0.617	5.24e-05	0.169	ExN.CA1.2	Znrf1
2.27e-09	0.405801	1	0.993	5.28e-05	0.007	ExN.CA1.2	Grm5
2.28e-09	-0.331704	0.485	0.581	5.31e-05	-0.096	ExN.CA1.2	Tmem63b
2.29e-09	0.350753	1	0.987	5.32e-05	0.013	ExN.CA1.2	Ctnnd2
2.5e-09	-0.317722	0.62	0.653	5.82e-05	-0.033	ExN.CA1.2	Dlg4
2.56e-09	0.332616	0.694	0.51	5.94e-05	0.184	ExN.CA1.2	Commd10
2.78e-09	0.242037	0.989	0.922	6.45e-05	0.067	ExN.CA1.2	Sorbs1
2.79e-09	-0.350169	0.294	0.416	6.49e-05	-0.122	ExN.CA1.2	Smarcd3
2.81e-09	-0.269377	0.173	0.301	6.54e-05	-0.128	ExN.CA1.2	Celsr2
2.83e-09	-0.390096	0.636	0.71	6.59e-05	-0.074	ExN.CA1.2	Plekha7
2.83e-09	0.191418	0.824	0.657	6.59e-05	0.167	ExN.CA1.2	Rfx7
2.95e-09	-0.299631	0.225	0.388	6.86e-05	-0.163	ExN.CA1.2	Parp1
3.1e-09	0.360668	0.959	0.88	7.22e-05	0.079	ExN.CA1.2	Rnf150
3.13e-09	0.391225	0.995	0.967	7.27e-05	0.028	ExN.CA1.2	Ldb2
3.22e-09	0.379686	0.987	0.944	7.48e-05	0.043	ExN.CA1.2	Grm8
3.29e-09	0.352477	0.994	0.96	7.64e-05	0.034	ExN.CA1.2	Setbp1
3.53e-09	-0.398649	0.589	0.679	8.21e-05	-0.09	ExN.CA1.2	Agap2
3.55e-09	0.293232	0.424	0.247	8.25e-05	0.177	ExN.CA1.2	5730419F03Rik
3.64e-09	0.392616	0.814	0.679	8.47e-05	0.135	ExN.CA1.2	Nxpe4
3.85e-09	0.38036	0.984	0.931	8.95e-05	0.053	ExN.CA1.2	Rims1
3.98e-09	0.173556	0.926	0.797	9.24e-05	0.129	ExN.CA1.2	Scn2a
4.06e-09	0.456665	0.803	0.657	9.44e-05	0.146	ExN.CA1.2	Fhit
4.17e-09	0.375023	1	0.982	9.7e-05	0.018	ExN.CA1.2	Epha6
4.24e-09	-0.16335	0.044	0.147	9.85e-05	-0.103	ExN.CA1.2	Tspyl2
4.25e-09	0.327544	0.567	0.376	9.87e-05	0.191	ExN.CA1.2	Gm19410
4.74e-09	-0.20914	0.08	0.196	0.000110175	-0.116	ExN.CA1.2	Itpka
5.11e-09	-0.299777	0.304	0.416	0.000118727	-0.112	ExN.CA1.2	Odf2
5.29e-09	0.402319	0.869	0.751	0.000122963	0.118	ExN.CA1.2	Nol4
5.57e-09	0.321136	0.813	0.657	0.000129503	0.156	ExN.CA1.2	Hdac8
5.75e-09	0.329584	0.8	0.648	0.000133736	0.152	ExN.CA1.2	Mnat1
6.15e-09	-0.348164	0.545	0.617	0.000142888	-0.072	ExN.CA1.2	Lrp1
6.46e-09	0.305862	0.946	0.851	0.000150167	0.095	ExN.CA1.2	Astn1
6.5e-09	0.376251	0.58	0.425	0.000151125	0.155	ExN.CA1.2	Spink10
6.5e-09	0.338273	0.874	0.766	0.000151148	0.108	ExN.CA1.2	Dpysl2
6.78e-09	0.341245	0.973	0.904	0.000157577	0.069	ExN.CA1.2	Brinp1
6.82e-09	-0.108475	0.991	0.935	0.000158633	0.056	ExN.CA1.2	Scn8a
6.94e-09	0.281194	0.877	0.735	0.000161412	0.142	ExN.CA1.2	Cyrib
7.18e-09	-0.210056	0.049	0.151	0.000166941	-0.102	ExN.CA1.2	Hap1
7.26e-09	0.342485	0.575	0.39	0.000168867	0.185	ExN.CA1.2	Armh4
7.83e-09	0.465533	0.694	0.517	0.000182091	0.177	ExN.CA1.2	Gfra1
7.97e-09	0.260795	0.721	0.541	0.000185228	0.18	ExN.CA1.2	Herc3
8.23e-09	0.2942	0.86	0.71	0.000191328	0.15	ExN.CA1.2	Tmem200a
8.33e-09	0.324969	0.872	0.731	0.00019358	0.141	ExN.CA1.2	Trpc5
8.37e-09	-0.214455	0.12	0.265	0.000194472	-0.145	ExN.CA1.2	Nrbp2
8.55e-09	0.378829	0.994	0.955	0.000198675	0.039	ExN.CA1.2	Kcnq3
8.78e-09	0.251845	0.994	0.938	0.000204076	0.056	ExN.CA1.2	Dok6
9.17e-09	-0.311404	0.261	0.419	0.00021322	-0.158	ExN.CA1.2	Zmiz2
9.4e-09	0.34674	0.69	0.532	0.000218572	0.158	ExN.CA1.2	Exoc2
9.55e-09	0.270612	0.847	0.695	0.000222019	0.152	ExN.CA1.2	Bmerb1
1e-08	0.315036	0.778	0.617	0.000232399	0.161	ExN.CA1.2	Catspere2
1.02e-08	0.356958	0.94	0.849	0.000236034	0.091	ExN.CA1.2	Xkr6
1.03e-08	0.33957	0.769	0.615	0.000238495	0.154	ExN.CA1.2	Kif16b
1.03e-08	0.298687	0.819	0.664	0.000239326	0.155	ExN.CA1.2	Nbas
1.06e-08	0.30343	0.855	0.713	0.000247282	0.142	ExN.CA1.2	Erc1
1.11e-08	0.374634	0.767	0.606	0.000257244	0.161	ExN.CA1.2	Pak1
1.13e-08	-0.343528	0.943	0.944	0.000262283	-0.001	ExN.CA1.2	Cacna1a
1.18e-08	0.37631	0.976	0.929	0.000274245	0.047	ExN.CA1.2	Kcnj6
1.18e-08	0.387518	0.89	0.78	0.000274722	0.11	ExN.CA1.2	Mir99ahg
1.19e-08	0.255116	0.827	0.668	0.000275643	0.159	ExN.CA1.2	Chchd3
1.19e-08	0.304436	0.918	0.8	0.000276064	0.118	ExN.CA1.2	Frmd5
1.22e-08	-0.358795	0.465	0.61	0.000283362	-0.145	ExN.CA1.2	Trrap
1.24e-08	0.302566	0.824	0.668	0.000289185	0.156	ExN.CA1.2	Hacd2
1.25e-08	0.266122	0.477	0.296	0.000289944	0.181	ExN.CA1.2	Wdr44
1.25e-08	-0.223776	0.126	0.245	0.000291553	-0.119	ExN.CA1.2	Med24
1.28e-08	-0.337411	0.255	0.405	0.000296894	-0.15	ExN.CA1.2	Nr4a1
1.32e-08	0.325648	0.983	0.935	0.000306041	0.048	ExN.CA1.2	Mapk10
1.33e-08	0.314275	0.863	0.722	0.000310019	0.141	ExN.CA1.2	Elmo1
1.36e-08	0.170568	0.92	0.793	0.000316982	0.127	ExN.CA1.2	Arid5b
1.4e-08	0.302396	0.984	0.924	0.000324683	0.06	ExN.CA1.2	Pcsk2
1.45e-08	0.439296	0.389	0.223	0.000337513	0.166	ExN.CA1.2	Bmper
1.47e-08	0.348276	0.838	0.702	0.000340908	0.136	ExN.CA1.2	Gm20696
1.48e-08	0.259156	0.863	0.717	0.000343593	0.146	ExN.CA1.2	Ccdc148
1.48e-08	-0.251381	0.132	0.269	0.000344563	-0.137	ExN.CA1.2	Adam11
1.57e-08	0.297586	0.811	0.655	0.000365444	0.156	ExN.CA1.2	Nr6a1
1.65e-08	0.203182	0.976	0.893	0.000384137	0.083	ExN.CA1.2	Mbnl2
1.67e-08	-0.27394	0.186	0.323	0.00038926	-0.137	ExN.CA1.2	Dctn1
1.71e-08	0.337951	0.962	0.895	0.000396939	0.067	ExN.CA1.2	Atp8a2
1.74e-08	0.293607	0.978	0.911	0.000403599	0.067	ExN.CA1.2	Plcl2
1.76e-08	-0.336279	0.572	0.664	0.000408767	-0.092	ExN.CA1.2	Gm3764
1.77e-08	0.341535	0.757	0.606	0.000411178	0.151	ExN.CA1.2	Sclt1
1.78e-08	0.334451	0.984	0.929	0.00041337	0.055	ExN.CA1.2	Kcnj3
1.79e-08	0.366133	0.66	0.488	0.000415611	0.172	ExN.CA1.2	Gabra4
1.81e-08	0.328564	0.997	0.971	0.000419799	0.026	ExN.CA1.2	Camta1
1.88e-08	0.294262	0.877	0.746	0.000437126	0.131	ExN.CA1.2	Bicd1
1.9e-08	0.312652	0.696	0.521	0.000442486	0.175	ExN.CA1.2	Myo1d
1.97e-08	0.313067	0.929	0.833	0.000458227	0.096	ExN.CA1.2	Stag1
2.09e-08	0.237579	0.813	0.653	0.000486638	0.16	ExN.CA1.2	Tmem135
2.1e-08	0.284209	0.918	0.802	0.000487159	0.116	ExN.CA1.2	Tiam1
2.2e-08	-0.478689	0.301	0.428	0.000511524	-0.127	ExN.CA1.2	Ntng2
2.23e-08	0.322825	0.603	0.421	0.000517402	0.182	ExN.CA1.2	Rcan2
2.25e-08	-0.379473	0.942	0.913	0.000522185	0.029	ExN.CA1.2	R3hdm1
2.42e-08	0.347516	0.994	0.969	0.000563193	0.025	ExN.CA1.2	Tcf4
2.43e-08	-0.327056	0.428	0.563	0.000564245	-0.135	ExN.CA1.2	Ap3b2
2.44e-08	0.339136	0.83	0.684	0.00056646	0.146	ExN.CA1.2	Copg2
2.57e-08	0.350719	0.805	0.661	0.000597762	0.144	ExN.CA1.2	Arhgap12
2.59e-08	0.395695	0.909	0.826	0.000602137	0.083	ExN.CA1.2	2210408I21Rik
2.65e-08	0.335328	0.581	0.43	0.000615567	0.151	ExN.CA1.2	Pde7a
2.65e-08	0.277399	0.529	0.35	0.000616601	0.179	ExN.CA1.2	Pank1
2.66e-08	0.389809	0.389	0.223	0.000619217	0.166	ExN.CA1.2	St8sia2
2.67e-08	0.276757	0.767	0.599	0.000619812	0.168	ExN.CA1.2	Flrt2
2.73e-08	0.391074	0.998	0.993	0.00063446	0.005	ExN.CA1.2	Grm7
2.74e-08	0.276398	0.959	0.869	0.000637339	0.09	ExN.CA1.2	A230057D06Rik
2.82e-08	-0.202231	0.088	0.209	0.000654921	-0.121	ExN.CA1.2	Srsf5
2.84e-08	0.380505	0.986	0.958	0.000659388	0.028	ExN.CA1.2	Nr3c2
3.01e-08	-0.220076	0.112	0.245	0.000699826	-0.133	ExN.CA1.2	Fbxl16
3.09e-08	0.357998	0.613	0.439	0.000719057	0.174	ExN.CA1.2	Fgf13
3.17e-08	0.289217	0.811	0.659	0.000738023	0.152	ExN.CA1.2	Senp7
3.19e-08	0.355178	0.953	0.88	0.000741485	0.073	ExN.CA1.2	Jazf1
3.25e-08	-0.269601	0.184	0.298	0.000755741	-0.114	ExN.CA1.2	Kifc2
3.44e-08	-0.259208	0.145	0.272	0.000799476	-0.127	ExN.CA1.2	ENSMUSG00000095041
3.79e-08	0.275647	0.825	0.677	0.000880312	0.148	ExN.CA1.2	Kdm4c
3.82e-08	-0.340675	0.37	0.499	0.000889134	-0.129	ExN.CA1.2	Slc22a17
3.94e-08	0.179527	0.184	0.067	0.000915562	0.117	ExN.CA1.2	Gm50330
3.95e-08	0.27912	0.883	0.755	0.000917892	0.128	ExN.CA1.2	Srpk2
4e-08	0.310279	0.427	0.265	0.00092883	0.162	ExN.CA1.2	Tle1
4.08e-08	0.330444	0.943	0.851	0.000948828	0.092	ExN.CA1.2	Atrnl1
4.11e-08	0.335977	0.994	0.969	0.00095581	0.025	ExN.CA1.2	Tmem178b
4.2e-08	0.365232	0.997	0.984	0.000976263	0.013	ExN.CA1.2	Slc8a1
4.28e-08	0.269139	0.746	0.579	0.00099516	0.167	ExN.CA1.2	Clvs2
4.47e-08	0.376754	0.899	0.788	0.00103865	0.111	ExN.CA1.2	Hdac9
4.67e-08	0.885706	0.408	0.269	0.00108486	0.139	ExN.CA1.2	Ptprk
4.68e-08	0.391122	0.565	0.394	0.00108788	0.171	ExN.CA1.2	Pcdh17
4.79e-08	0.198418	0.972	0.886	0.00111419	0.086	ExN.CA1.2	Cntn1
5.02e-08	0.293189	0.775	0.617	0.00116815	0.158	ExN.CA1.2	Pdss2
5.1e-08	-0.221654	0.104	0.232	0.00118536	-0.128	ExN.CA1.2	Pitpnm1
5.19e-08	0.310581	0.406	0.243	0.00120562	0.163	ExN.CA1.2	Slc16a10
5.25e-08	0.29312	0.537	0.365	0.00122159	0.172	ExN.CA1.2	Cep85l
5.27e-08	0.324803	0.843	0.733	0.00122499	0.11	ExN.CA1.2	Gm49353
5.46e-08	0.499959	0.309	0.158	0.0012692	0.151	ExN.CA1.2	Angpt1
5.49e-08	0.289297	0.283	0.147	0.00127635	0.136	ExN.CA1.2	Lurap1l
5.56e-08	-0.159582	0.049	0.14	0.00129223	-0.091	ExN.CA1.2	B4galnt4
5.66e-08	-0.288449	0.271	0.41	0.00131492	-0.139	ExN.CA1.2	Dbn1
5.75e-08	-0.359436	0.647	0.726	0.00133762	-0.079	ExN.CA1.2	Cacna1g
5.89e-08	-0.274594	0.192	0.31	0.00137021	-0.118	ExN.CA1.2	Clasrp
5.92e-08	-0.317898	0.299	0.448	0.0013765	-0.149	ExN.CA1.2	Ryr1
6.09e-08	-0.168905	0.044	0.143	0.00141546	-0.099	ExN.CA1.2	Jag2
6.25e-08	0.28686	0.981	0.922	0.001454	0.059	ExN.CA1.2	Ppp2r2b
6.28e-08	0.305837	0.986	0.933	0.00145973	0.053	ExN.CA1.2	Ext1
6.38e-08	0.258134	0.95	0.851	0.00148287	0.099	ExN.CA1.2	Rab3c
6.57e-08	0.245128	0.713	0.543	0.00152626	0.17	ExN.CA1.2	Mark1
6.62e-08	-0.290588	0.25	0.385	0.00153856	-0.135	ExN.CA1.2	Camta2
6.65e-08	0.117839	0.75	0.595	0.00154522	0.155	ExN.CA1.2	Arfgef1
6.9e-08	0.326986	0.765	0.621	0.00160332	0.144	ExN.CA1.2	Fut8
7e-08	-0.256019	0.186	0.327	0.00162827	-0.141	ExN.CA1.2	Chst1
7.17e-08	-0.219364	0.128	0.247	0.00166593	-0.119	ExN.CA1.2	Icam5
7.19e-08	0.210235	0.865	0.724	0.00167139	0.141	ExN.CA1.2	Pcsk5
7.36e-08	-0.174922	0.061	0.169	0.00171133	-0.108	ExN.CA1.2	Tmem214
7.74e-08	-0.307616	0.313	0.468	0.00180035	-0.155	ExN.CA1.2	Atxn2l
7.91e-08	0.469696	0.213	0.089	0.00183972	0.124	ExN.CA1.2	Satb2
8.06e-08	-0.290451	0.386	0.452	0.00187495	-0.066	ExN.CA1.2	Baz2a
8.16e-08	-0.323401	0.573	0.639	0.00189706	-0.066	ExN.CA1.2	Cntfr
8.24e-08	0.268424	0.88	0.753	0.00191506	0.127	ExN.CA1.2	Cpeb3
8.24e-08	0.296499	0.69	0.519	0.00191554	0.171	ExN.CA1.2	Slc8a3
8.36e-08	-0.177586	0.069	0.178	0.00194333	-0.109	ExN.CA1.2	Zfp512b
8.53e-08	0.0960802	0.989	0.922	0.00198337	0.067	ExN.CA1.2	Rapgef5
8.57e-08	0.267399	0.523	0.35	0.00199133	0.173	ExN.CA1.2	Zfp654
8.65e-08	0.367153	0.75	0.606	0.0020112	0.144	ExN.CA1.2	Acyp2
8.81e-08	-0.242455	0.145	0.269	0.00204839	-0.124	ExN.CA1.2	Srrt
8.92e-08	0.246119	0.704	0.535	0.00207325	0.169	ExN.CA1.2	Slmap
9.68e-08	-0.2923	0.822	0.824	0.00225019	-0.002	ExN.CA1.2	Ncor2
9.73e-08	-1.51879	0.893	0.918	0.0022629	-0.025	ExN.CA1.2	Rn18s-rs5
9.9e-08	0.323475	0.94	0.851	0.00230062	0.089	ExN.CA1.2	Ust
9.93e-08	0.420732	0.935	0.922	0.00230945	0.013	ExN.CA1.2	Cntnap5b
1.03e-07	0.306193	0.553	0.419	0.00239137	0.134	ExN.CA1.2	Papss1
1.04e-07	0.258349	0.991	0.942	0.0024167	0.049	ExN.CA1.2	Sv2b
1.1e-07	0.313399	0.485	0.327	0.00255357	0.158	ExN.CA1.2	Amy1
1.13e-07	0.155441	0.802	0.65	0.00263777	0.152	ExN.CA1.2	Zmiz1os1
1.14e-07	0.340651	0.698	0.566	0.00265141	0.132	ExN.CA1.2	Lemd3
1.21e-07	0.205699	0.707	0.541	0.00280999	0.166	ExN.CA1.2	Sntb2
1.22e-07	-0.176537	0.061	0.169	0.00282632	-0.108	ExN.CA1.2	Podn
1.23e-07	-0.250575	0.169	0.287	0.00287058	-0.118	ExN.CA1.2	Agrn
1.24e-07	-0.276553	0.291	0.412	0.00287526	-0.121	ExN.CA1.2	Cacnb1
1.26e-07	0.313715	0.706	0.548	0.00293958	0.158	ExN.CA1.2	Ranbp17
1.28e-07	-0.339646	0.515	0.592	0.00296416	-0.077	ExN.CA1.2	Lpgat1
1.29e-07	0.258192	0.731	0.568	0.00299558	0.163	ExN.CA1.2	Kifap3
1.29e-07	0.388022	0.835	0.731	0.00300417	0.104	ExN.CA1.2	Camk4
1.31e-07	0.254447	0.594	0.421	0.0030339	0.173	ExN.CA1.2	Pnpla8
1.38e-07	-0.227344	0.146	0.283	0.00320618	-0.137	ExN.CA1.2	Zswim8
1.4e-07	0.343383	0.68	0.535	0.00324483	0.145	ExN.CA1.2	Nuak1
1.44e-07	0.424708	0.677	0.548	0.00334846	0.129	ExN.CA1.2	Cyp7b1
1.45e-07	-0.294315	0.309	0.439	0.00336186	-0.13	ExN.CA1.2	Slc6a7
1.46e-07	0.262304	0.386	0.243	0.00338998	0.143	ExN.CA1.2	Cyp2c52-ps
1.47e-07	-0.311988	0.874	0.871	0.00342374	0.003	ExN.CA1.2	Camk2b
1.49e-07	0.35348	0.523	0.356	0.0034643	0.167	ExN.CA1.2	Abca8b
1.51e-07	0.226482	0.501	0.332	0.00351963	0.169	ExN.CA1.2	Mtm1
1.53e-07	0.18903	0.198	0.085	0.00356068	0.113	ExN.CA1.2	A930029G22Rik
1.54e-07	-0.170787	0.085	0.194	0.0035833	-0.109	ExN.CA1.2	Pcbp4
1.55e-07	0.225663	0.751	0.59	0.0035981	0.161	ExN.CA1.2	Top1
1.6e-07	-0.204494	0.102	0.227	0.00371912	-0.125	ExN.CA1.2	Gpr162
1.61e-07	-0.354714	0.247	0.408	0.00373535	-0.161	ExN.CA1.2	Fbn2
1.61e-07	-0.27512	0.806	0.802	0.00373993	0.004	ExN.CA1.2	Atp1a3
1.68e-07	0.235187	0.762	0.604	0.0039107	0.158	ExN.CA1.2	Bicdl1
1.7e-07	0.316948	0.737	0.592	0.00396195	0.145	ExN.CA1.2	Rsrc1
1.71e-07	0.292838	0.857	0.731	0.00398507	0.126	ExN.CA1.2	Ank
1.79e-07	0.343836	0.98	0.938	0.00416656	0.042	ExN.CA1.2	Sorcs2
1.85e-07	-0.0365547	0.932	0.84	0.00430878	0.092	ExN.CA1.2	Ralgapa1
1.87e-07	0.29028	0.699	0.539	0.00435244	0.16	ExN.CA1.2	Cwc27
1.96e-07	0.254941	0.984	0.931	0.0045501	0.053	ExN.CA1.2	Tnik
1.97e-07	0.268687	0.995	0.96	0.00458733	0.035	ExN.CA1.2	Prkn
1.98e-07	0.25701	0.868	0.739	0.00461425	0.129	ExN.CA1.2	Kif5c
1.99e-07	0.220246	0.272	0.143	0.00462764	0.129	ExN.CA1.2	Haao
2.02e-07	0.344435	0.602	0.445	0.00470332	0.157	ExN.CA1.2	Bbx
2.04e-07	0.315836	0.424	0.267	0.00474435	0.157	ExN.CA1.2	Tpk1
2.04e-07	-0.231552	0.142	0.263	0.00474449	-0.121	ExN.CA1.2	Prr12
2.05e-07	0.307609	0.956	0.88	0.00476557	0.076	ExN.CA1.2	Mllt3
2.06e-07	0.282104	0.995	0.967	0.00478597	0.028	ExN.CA1.2	Nbea
2.09e-07	0.303756	0.498	0.341	0.00486323	0.157	ExN.CA1.2	Gm48755
2.09e-07	-0.265173	0.472	0.334	0.00487035	0.138	ExN.CA1.2	Unc5d
2.13e-07	0.316293	0.767	0.628	0.00496008	0.139	ExN.CA1.2	Sdccag8
2.19e-07	0.30506	0.43	0.267	0.00508294	0.163	ExN.CA1.2	Spock3
2.26e-07	-0.278982	0.285	0.439	0.00525661	-0.154	ExN.CA1.2	Gm47283
2.3e-07	0.308143	0.992	0.969	0.0053479	0.023	ExN.CA1.2	Atxn1
2.36e-07	-0.320515	0.641	0.699	0.00547547	-0.058	ExN.CA1.2	Sez6
2.46e-07	-0.238147	0.161	0.281	0.00571971	-0.12	ExN.CA1.2	Zfr2
2.47e-07	0.331267	0.745	0.599	0.00574229	0.146	ExN.CA1.2	Zfp827
2.48e-07	0.332502	0.923	0.844	0.00575915	0.079	ExN.CA1.2	Rapgef4
2.49e-07	0.27681	0.723	0.563	0.00577714	0.16	ExN.CA1.2	Sgk1
2.51e-07	0.165502	0.543	0.383	0.00584188	0.16	ExN.CA1.2	Afg1l
2.6e-07	0.257071	0.773	0.621	0.00603679	0.152	ExN.CA1.2	Map2k5
2.61e-07	0.342207	0.646	0.497	0.00606691	0.149	ExN.CA1.2	Asxl3
2.61e-07	-0.327544	0.65	0.717	0.0060719	-0.067	ExN.CA1.2	Prrc2b
2.68e-07	0.566515	0.365	0.236	0.00623818	0.129	ExN.CA1.2	Synpr
2.8e-07	-0.0372199	0.743	0.633	0.00650501	0.11	ExN.CA1.2	Gm53029
2.84e-07	0.284511	0.638	0.481	0.00659915	0.157	ExN.CA1.2	Lonrf2
2.89e-07	-0.329829	0.534	0.604	0.00671279	-0.07	ExN.CA1.2	Zfhx2
2.89e-07	0.119425	0.858	0.726	0.00672309	0.132	ExN.CA1.2	Apbb2
2.9e-07	0.339624	0.405	0.252	0.00673801	0.153	ExN.CA1.2	Dach1
3.02e-07	-0.217745	0.148	0.283	0.00702058	-0.135	ExN.CA1.2	Smg5
3.07e-07	0.448354	0.964	0.944	0.00712637	0.02	ExN.CA1.2	Grid2
3.08e-07	-0.377459	0.231	0.151	0.0071611	0.08	ExN.CA1.2	Adamtsl1
3.09e-07	0.309714	0.619	0.468	0.00717835	0.151	ExN.CA1.2	Xpr1
3.12e-07	0.287565	0.479	0.318	0.00725256	0.161	ExN.CA1.2	Tank
3.13e-07	0.271576	0.528	0.363	0.00728155	0.165	ExN.CA1.2	Ptdss1
3.2e-07	0.2912	0.506	0.341	0.00744939	0.165	ExN.CA1.2	Lrrn1
3.25e-07	0.321423	0.831	0.697	0.00755715	0.134	ExN.CA1.2	Homer1
3.3e-07	0.318201	0.918	0.824	0.00766158	0.094	ExN.CA1.2	Sh3gl2
3.31e-07	-0.218569	0.164	0.292	0.00770485	-0.128	ExN.CA1.2	Hnrnpl
3.32e-07	0.297196	0.877	0.766	0.00771576	0.111	ExN.CA1.2	Snd1
3.43e-07	-0.231154	0.139	0.263	0.00797253	-0.124	ExN.CA1.2	Rogdi
3.54e-07	0.357476	0.995	0.989	0.00822349	0.006	ExN.CA1.2	Agbl4
3.57e-07	-0.184354	0.082	0.187	0.00829974	-0.105	ExN.CA1.2	Git1
3.58e-07	0.282017	0.997	0.962	0.0083117	0.035	ExN.CA1.2	Pde1a
3.58e-07	0.407615	0.912	0.829	0.00831452	0.083	ExN.CA1.2	Gm20754
3.65e-07	0.314413	0.939	0.864	0.00848616	0.075	ExN.CA1.2	Strbp
3.99e-07	0.252638	0.732	0.575	0.00928174	0.157	ExN.CA1.2	Sik2
4.07e-07	0.223394	0.638	0.472	0.00946779	0.166	ExN.CA1.2	Wac
4.13e-07	-0.263671	0.244	0.383	0.00960864	-0.139	ExN.CA1.2	Rundc3a
4.15e-07	0.267065	0.89	0.777	0.00963938	0.113	ExN.CA1.2	Phf14
4.15e-07	0.219379	0.301	0.16	0.00964532	0.141	ExN.CA1.2	Vmn2r87
4.18e-07	0.308533	0.713	0.57	0.00970975	0.143	ExN.CA1.2	Nek1
4.18e-07	-0.00722691	0.978	0.909	0.00972316	0.069	ExN.CA1.2	Ttc7b
4.35e-07	0.353837	0.896	0.806	0.0101227	0.09	ExN.CA1.2	Esrrg
4.38e-07	-0.291816	0.416	0.563	0.010175	-0.147	ExN.CA1.2	Brsk2
4.46e-07	-0.281835	0.49	0.572	0.0103627	-0.082	ExN.CA1.2	Sfswap
4.46e-07	0.275226	0.381	0.229	0.010363	0.152	ExN.CA1.2	Plek
4.48e-07	-0.253585	0.195	0.327	0.0104225	-0.132	ExN.CA1.2	Pou6f1
4.56e-07	0.276038	0.992	0.967	0.0105931	0.025	ExN.CA1.2	Ksr2
4.77e-07	0.225583	0.921	0.813	0.0110937	0.108	ExN.CA1.2	Neto1
5.1e-07	0.996424	0.499	0.365	0.0118558	0.134	ExN.CA1.2	Thsd7b
5.19e-07	-0.237007	0.117	0.229	0.0120769	-0.112	ExN.CA1.2	Rsph3b
5.23e-07	0.325885	0.591	0.439	0.0121512	0.152	ExN.CA1.2	Rnf180
5.3e-07	0.182513	0.592	0.432	0.0123209	0.16	ExN.CA1.2	Hivep1
5.33e-07	0.316068	0.602	0.468	0.0123967	0.134	ExN.CA1.2	Sacs
5.43e-07	0.273539	0.309	0.169	0.0126312	0.14	ExN.CA1.2	Mef2c
5.67e-07	0.299478	0.638	0.497	0.0131826	0.141	ExN.CA1.2	Rnf13
5.8e-07	-0.12483	0.031	0.107	0.0134934	-0.076	ExN.CA1.2	Noc2l
5.87e-07	0.309016	0.335	0.192	0.0136366	0.143	ExN.CA1.2	Gsg1l
5.93e-07	0.238348	0.924	0.824	0.0137828	0.1	ExN.CA1.2	Pcca
6.01e-07	0.253671	0.765	0.617	0.0139785	0.148	ExN.CA1.2	Wasf3
6.11e-07	0.191046	0.91	0.797	0.0142116	0.113	ExN.CA1.2	Birc6
6.12e-07	0.316353	1	0.998	0.0142195	0.002	ExN.CA1.2	Dab1
6.18e-07	0.292036	0.902	0.793	0.0143775	0.109	ExN.CA1.2	Slc9a9
6.19e-07	0.239384	0.986	0.931	0.0143811	0.055	ExN.CA1.2	Grid1
6.21e-07	-0.239081	0.227	0.374	0.0144468	-0.147	ExN.CA1.2	Arhgap33
6.25e-07	0.200399	0.633	0.472	0.0145221	0.161	ExN.CA1.2	Zfat
6.28e-07	0.635345	0.506	0.374	0.0146111	0.132	ExN.CA1.2	Slc4a4
6.34e-07	0.282162	0.789	0.65	0.0147501	0.139	ExN.CA1.2	Cyria
6.35e-07	0.288704	0.998	0.989	0.0147509	0.009	ExN.CA1.2	Ank2
6.38e-07	0.43861	0.995	0.969	0.0148381	0.026	ExN.CA1.2	Cntnap2
6.47e-07	0.341894	0.778	0.635	0.0150326	0.143	ExN.CA1.2	Adamts2
6.48e-07	-0.220568	0.206	0.352	0.0150708	-0.146	ExN.CA1.2	Dctn2
6.79e-07	-0.134978	0.041	0.125	0.0157955	-0.084	ExN.CA1.2	Afap1l1
6.8e-07	0.182894	0.865	0.735	0.0157978	0.13	ExN.CA1.2	Tusc3
6.97e-07	0.288116	0.728	0.572	0.0162132	0.156	ExN.CA1.2	Man2a1
6.99e-07	0.224442	0.92	0.815	0.0162578	0.105	ExN.CA1.2	Rtn3
7.05e-07	0.283242	0.992	0.962	0.0163801	0.03	ExN.CA1.2	Gria2
7.06e-07	-0.249529	0.206	0.325	0.0164084	-0.119	ExN.CA1.2	Cpt1c
7.19e-07	0.281051	0.89	0.786	0.0167157	0.104	ExN.CA1.2	Dym
7.19e-07	-0.320285	0.806	0.837	0.0167223	-0.031	ExN.CA1.2	Grin1
7.2e-07	0.0959209	0.898	0.782	0.0167454	0.116	ExN.CA1.2	Atp9b
7.26e-07	0.268445	0.934	0.851	0.0168722	0.083	ExN.CA1.2	Fto
7.32e-07	-0.155838	0.052	0.134	0.0170123	-0.082	ExN.CA1.2	Car11
7.34e-07	0.19088	0.208	0.091	0.0170538	0.117	ExN.CA1.2	Gm15264
7.44e-07	0.432493	0.682	0.548	0.0173079	0.134	ExN.CA1.2	Edil3
7.49e-07	0.270232	0.945	0.857	0.017404	0.088	ExN.CA1.2	Pak3
7.63e-07	-0.176024	0.08	0.178	0.0177361	-0.098	ExN.CA1.2	Cbarp
7.72e-07	0.25398	0.665	0.506	0.0179521	0.159	ExN.CA1.2	Luzp1
7.75e-07	0.138033	0.946	0.851	0.0180098	0.095	ExN.CA1.2	Mrtfb
7.85e-07	-0.265333	0.718	0.737	0.0182529	-0.019	ExN.CA1.2	Unc13a
7.89e-07	0.279969	0.49	0.334	0.018344	0.156	ExN.CA1.2	Hdx
7.95e-07	0.129655	0.913	0.802	0.0184886	0.111	ExN.CA1.2	Nmnat2
8.26e-07	0.175185	0.611	0.452	0.0192037	0.159	ExN.CA1.2	Adamts20
8.28e-07	-0.217107	0.126	0.225	0.0192584	-0.099	ExN.CA1.2	Rsrp1
8.29e-07	0.284859	0.674	0.517	0.019261	0.157	ExN.CA1.2	Pantr1
8.33e-07	0.218459	0.715	0.559	0.0193716	0.156	ExN.CA1.2	Gabra3
8.59e-07	-0.309538	0.839	0.855	0.0199712	-0.016	ExN.CA1.2	Nfix
8.88e-07	0.354148	0.509	0.365	0.0206355	0.144	ExN.CA1.2	9530052E02Rik
8.89e-07	-0.185232	0.877	0.829	0.0206563	0.048	ExN.CA1.2	Kif1b
9e-07	0.27053	0.887	0.78	0.0209201	0.107	ExN.CA1.2	Rapgef2
9.08e-07	0.27448	0.254	0.127	0.0211028	0.127	ExN.CA1.2	Lhfp
9.28e-07	0.284279	0.998	0.989	0.0215643	0.009	ExN.CA1.2	Prkce
9.48e-07	0.271116	0.978	0.92	0.0220498	0.058	ExN.CA1.2	Iqsec1
9.49e-07	-0.209497	0.154	0.287	0.022072	-0.133	ExN.CA1.2	Brd9
9.55e-07	0.293199	0.49	0.336	0.02221	0.154	ExN.CA1.2	Epb41
9.69e-07	-0.0971514	0.688	0.617	0.0225311	0.071	ExN.CA1.2	Mdm4
9.72e-07	0.258602	0.939	0.853	0.0225996	0.086	ExN.CA1.2	Bcas3
9.87e-07	0.215851	0.888	0.771	0.0229413	0.117	ExN.CA1.2	Ncoa2
9.97e-07	0.288577	0.898	0.804	0.0231723	0.094	ExN.CA1.2	Ica1
1e-06	0.592842	0.831	0.71	0.0232856	0.121	ExN.CA1.2	Nrg1
1.01e-06	-0.198796	0.792	0.753	0.0234662	0.039	ExN.CA1.2	Trank1
1.02e-06	0.282825	0.964	0.906	0.0236429	0.058	ExN.CA1.2	Pclo
1.04e-06	0.33112	0.51	0.37	0.0242559	0.14	ExN.CA1.2	Btbd3
1.05e-06	0.293918	0.257	0.134	0.0244633	0.123	ExN.CA1.2	Sfmbt2
1.06e-06	0.236924	0.606	0.445	0.0245629	0.161	ExN.CA1.2	Rundc3b
1.06e-06	0.286382	0.614	0.468	0.0246551	0.146	ExN.CA1.2	Purg
1.06e-06	0.233565	0.32	0.18	0.0246798	0.14	ExN.CA1.2	Sgpp2
1.08e-06	0.267893	0.906	0.802	0.0250477	0.104	ExN.CA1.2	Tafa5
1.09e-06	-0.445302	0.328	0.486	0.0254115	-0.158	ExN.CA1.2	Cdh4
1.09e-06	-0.235144	0.173	0.301	0.0254196	-0.128	ExN.CA1.2	Tbkbp1
1.1e-06	-0.257765	0.241	0.325	0.0255488	-0.084	ExN.CA1.2	Kcnh3
1.13e-06	-0.26184	0.299	0.396	0.0262649	-0.097	ExN.CA1.2	Pdlim7
1.14e-06	0.3336	0.685	0.539	0.0264141	0.146	ExN.CA1.2	Rgs17
1.14e-06	0.187928	0.94	0.844	0.0264221	0.096	ExN.CA1.2	Nfib
1.17e-06	0.361901	0.957	0.92	0.0272034	0.037	ExN.CA1.2	Kazn
1.21e-06	0.214473	0.778	0.633	0.0282061	0.145	ExN.CA1.2	Pdzrn4
1.24e-06	-0.293753	0.589	0.668	0.0289172	-0.079	ExN.CA1.2	Gabbr1
1.26e-06	-0.272282	0.197	0.285	0.0293551	-0.088	ExN.CA1.2	Cplx2
1.27e-06	0.284585	0.954	0.9	0.0294572	0.054	ExN.CA1.2	Mycbp2
1.27e-06	0.170815	0.479	0.33	0.0295628	0.149	ExN.CA1.2	Gm49906
1.29e-06	0.351011	0.91	0.831	0.0299313	0.079	ExN.CA1.2	Rtl4
1.29e-06	0.262174	0.798	0.661	0.0300296	0.137	ExN.CA1.2	Zfp407
1.3e-06	-0.248502	0.231	0.352	0.0301316	-0.121	ExN.CA1.2	Kif1c
1.31e-06	-0.256322	0.31	0.454	0.030346	-0.144	ExN.CA1.2	Tcf25
1.37e-06	0.290308	0.863	0.757	0.0317518	0.106	ExN.CA1.2	Tasp1
1.38e-06	0.174007	0.844	0.713	0.0321399	0.131	ExN.CA1.2	Jakmip3
1.44e-06	0.254529	0.992	0.953	0.0333748	0.039	ExN.CA1.2	Cnksr2
1.44e-06	-0.136559	0.058	0.154	0.0334071	-0.096	ExN.CA1.2	Fcho1
1.57e-06	0.234007	0.643	0.486	0.0364956	0.157	ExN.CA1.2	Ccser2
1.62e-06	0.320229	0.742	0.604	0.0376596	0.138	ExN.CA1.2	Pid1
1.65e-06	0.367448	0.611	0.481	0.0383521	0.13	ExN.CA1.2	Gm32014
1.65e-06	0.259322	0.991	0.953	0.0384692	0.038	ExN.CA1.2	Pbx1
1.69e-06	-0.15536	0.072	0.174	0.0392456	-0.102	ExN.CA1.2	Man2c1
1.69e-06	0.338897	1	0.998	0.039263	0.002	ExN.CA1.2	Opcml
1.69e-06	0.322889	0.989	0.949	0.0393837	0.04	ExN.CA1.2	Lrrc4c
1.74e-06	0.248133	0.712	0.561	0.0403557	0.151	ExN.CA1.2	Snx24
1.78e-06	-0.301602	0.446	0.563	0.0412722	-0.117	ExN.CA1.2	Kif21b
1.8e-06	0.305562	0.978	0.927	0.0418322	0.051	ExN.CA1.2	Rora
1.83e-06	0.241647	0.406	0.263	0.0426216	0.143	ExN.CA1.2	Cept1
1.85e-06	0.300427	0.97	0.92	0.0429585	0.05	ExN.CA1.2	Focad
1.89e-06	0.291144	0.997	0.973	0.0440429	0.024	ExN.CA1.2	Enox1
1.9e-06	-0.0972127	0.759	0.684	0.0441594	0.075	ExN.CA1.2	Rap1gap
1.9e-06	-0.180743	0.072	0.158	0.0442864	-0.086	ExN.CA1.2	Prpf8
1.92e-06	0.236924	0.994	0.958	0.0447367	0.036	ExN.CA1.2	Ntrk3
1.96e-06	-0.159281	0.08	0.185	0.0455975	-0.105	ExN.CA1.2	Gnpat
1.97e-06	-0.294962	0.455	0.568	0.0459147	-0.113	ExN.CA1.2	Mink1
1.98e-06	-0.279867	0.37	0.472	0.0460052	-0.102	ExN.CA1.2	Ift172
1.99e-06	0.389476	0.559	0.43	0.0463631	0.129	ExN.CA1.2	Ablim1
2.01e-06	-0.313408	1	1	0.0466931	0	ExN.CA1.2	Snhg14
2.02e-06	0.283117	0.809	0.69	0.0469113	0.119	ExN.CA1.2	Nsmce2
2.02e-06	-0.144592	0.043	0.12	0.0469712	-0.077	ExN.CA1.2	Fastk
2.03e-06	-0.155925	0.079	0.174	0.0471899	-0.095	ExN.CA1.2	Rnps1
2.06e-06	0.269084	0.923	0.835	0.0477957	0.088	ExN.CA1.2	Kcnq1ot1
2.09e-06	-0.259263	0.71	0.715	0.048512	-0.005	ExN.CA1.2	Kif5a
2.1e-06	0.263592	0.231	0.114	0.0489013	0.117	ExN.CA1.2	Vegfc
2.12e-06	0.232126	0.798	0.661	0.0492322	0.137	ExN.CA1.2	Ppargc1b
2.13e-06	0.0236946	0.824	0.706	0.0494239	0.118	ExN.CA1.2	Spred2
2.13e-06	0.1821	0.765	0.621	0.0495727	0.144	ExN.CA1.2	Ophn1
2.18e-06	0.304108	0.998	0.984	0.0507942	0.014	ExN.CA1.2	Kcnh7
2.2e-06	0.271438	0.717	0.584	0.0510694	0.133	ExN.CA1.2	Sacm1l
2.2e-06	0.211794	0.472	0.321	0.0510973	0.151	ExN.CA1.2	Igsf11
2.23e-06	0.231427	0.86	0.737	0.0519036	0.123	ExN.CA1.2	Cdh2
2.24e-06	-0.242311	0.324	0.405	0.0519769	-0.081	ExN.CA1.2	Sbf1
2.25e-06	0.223951	0.647	0.492	0.0522247	0.155	ExN.CA1.2	Abhd6
2.26e-06	-0.161793	0.076	0.174	0.0524365	-0.098	ExN.CA1.2	Adcy6
2.3e-06	0.284839	0.605	0.461	0.0533949	0.144	ExN.CA1.2	A330102I10Rik
2.37e-06	0.146509	0.954	0.869	0.0551717	0.085	ExN.CA1.2	Myrip
2.38e-06	0.218576	0.701	0.55	0.0553033	0.151	ExN.CA1.2	Cdh6
2.4e-06	0.14549	0.161	0.062	0.0558663	0.099	ExN.CA1.2	ENSMUSG00000120333
2.41e-06	0.256143	0.998	0.976	0.0559161	0.022	ExN.CA1.2	Cacna2d3
2.42e-06	0.262318	0.71	0.563	0.0561751	0.147	ExN.CA1.2	Ppargc1a
2.49e-06	0.293925	0.428	0.29	0.0579617	0.138	ExN.CA1.2	Enox2
2.56e-06	0.134674	0.545	0.401	0.0596062	0.144	ExN.CA1.2	Stag2
2.64e-06	0.197676	0.929	0.833	0.0612873	0.096	ExN.CA1.2	Gnaq
2.69e-06	0.263551	0.397	0.265	0.0624679	0.132	ExN.CA1.2	Sdhaf3
2.69e-06	0.239719	0.91	0.813	0.0626445	0.097	ExN.CA1.2	Chn1
2.72e-06	0.224458	0.926	0.833	0.0633005	0.093	ExN.CA1.2	Apc
2.78e-06	0.101233	0.918	0.815	0.0647374	0.103	ExN.CA1.2	Ptprr
2.79e-06	-0.176083	0.096	0.205	0.0648665	-0.109	ExN.CA1.2	Sidt2
2.8e-06	0.253484	0.901	0.8	0.0650138	0.101	ExN.CA1.2	Reps2
2.82e-06	-0.29431	0.504	0.626	0.0654545	-0.122	ExN.CA1.2	Slc12a5
2.85e-06	-0.272597	0.42	0.483	0.0663166	-0.063	ExN.CA1.2	Dip2a
2.88e-06	0.275131	0.803	0.682	0.0668404	0.121	ExN.CA1.2	Oxct1
2.88e-06	-0.151346	0.066	0.151	0.0669739	-0.085	ExN.CA1.2	Psd
2.88e-06	0.291827	0.981	0.94	0.0669931	0.041	ExN.CA1.2	Kcnn2
2.9e-06	0.274284	0.534	0.383	0.0674596	0.151	ExN.CA1.2	Xrcc4
2.95e-06	-0.247349	0.246	0.356	0.0684938	-0.11	ExN.CA1.2	Ankrd52
2.95e-06	0.230832	0.411	0.267	0.0686871	0.144	ExN.CA1.2	Srebf2
2.98e-06	-0.258879	0.255	0.381	0.0691728	-0.126	ExN.CA1.2	Map1a
3e-06	0.191685	0.992	0.947	0.0697312	0.045	ExN.CA1.2	Ndst3
3.07e-06	-0.260296	0.332	0.448	0.0714068	-0.116	ExN.CA1.2	Hdac5
3.08e-06	0.251921	0.762	0.624	0.0715352	0.138	ExN.CA1.2	Wdr17
3.11e-06	0.222476	0.611	0.457	0.07221	0.154	ExN.CA1.2	Mfhas1
3.13e-06	-0.330816	0.356	0.448	0.0728108	-0.092	ExN.CA1.2	Plch2
3.2e-06	-0.289044	0.494	0.566	0.0744562	-0.072	ExN.CA1.2	Son
3.25e-06	-0.210118	0.175	0.29	0.0755926	-0.115	ExN.CA1.2	Prpf40b
3.26e-06	-0.155525	0.087	0.178	0.075822	-0.091	ExN.CA1.2	Adam15
3.26e-06	0.320605	0.439	0.296	0.0758459	0.143	ExN.CA1.2	1110019D14Rik
3.29e-06	0.324063	0.906	0.815	0.0764272	0.091	ExN.CA1.2	Zfp697
3.33e-06	0.161508	0.162	0.067	0.0774648	0.095	ExN.CA1.2	Msmo1
3.36e-06	0.230033	0.781	0.644	0.078138	0.137	ExN.CA1.2	Stk3
3.38e-06	0.276506	0.688	0.546	0.0786264	0.142	ExN.CA1.2	Sfxn5
3.38e-06	0.233143	0.824	0.695	0.0786701	0.129	ExN.CA1.2	Scai
3.42e-06	0.278596	0.68	0.535	0.0795959	0.145	ExN.CA1.2	Slc16a7
3.47e-06	-0.183722	0.094	0.196	0.0807184	-0.102	ExN.CA1.2	Sh3glb2
3.6e-06	0.233902	0.984	0.942	0.0837046	0.042	ExN.CA1.2	Shank2
3.62e-06	0.0225387	0.216	0.145	0.0841489	0.071	ExN.CA1.2	Vrk2
3.66e-06	-0.202573	0.967	0.935	0.0850033	0.032	ExN.CA1.2	Ptprs
3.71e-06	0.234579	0.685	0.537	0.0862651	0.148	ExN.CA1.2	Ankib1
3.72e-06	-0.137766	0.077	0.176	0.0863896	-0.099	ExN.CA1.2	Cherp
3.73e-06	0.0403786	0.887	0.782	0.0867748	0.105	ExN.CA1.2	Btrc
3.76e-06	0.189475	0.854	0.731	0.0873237	0.123	ExN.CA1.2	Snap91
3.85e-06	0.370714	0.633	0.488	0.0894474	0.145	ExN.CA1.2	Cep112
3.85e-06	-0.22365	0.205	0.332	0.0895251	-0.127	ExN.CA1.2	Synpo
3.9e-06	-0.56406	0.317	0.301	0.0907778	0.016	ExN.CA1.2	Rgs6
3.95e-06	-0.135948	0.055	0.145	0.0917257	-0.09	ExN.CA1.2	Bag6
4e-06	0.264202	0.523	0.388	0.0928964	0.135	ExN.CA1.2	Atg4c
4.03e-06	0.212992	0.817	0.686	0.0936738	0.131	ExN.CA1.2	Galnt14
4.09e-06	0.332527	0.751	0.639	0.0950282	0.112	ExN.CA1.2	Epha4
4.14e-06	0.214931	0.975	0.915	0.0962472	0.06	ExN.CA1.2	Rimbp2
4.15e-06	0.149169	0.869	0.751	0.0964038	0.118	ExN.CA1.2	Kif21a
4.19e-06	-0.304858	0.68	0.722	0.0973417	-0.042	ExN.CA1.2	Shisa7
4.22e-06	0.144161	0.871	0.753	0.0981995	0.118	ExN.CA1.2	Cnot4
4.26e-06	-0.228495	0.213	0.341	0.0989856	-0.128	ExN.CA1.2	Hsf1
4.29e-06	0.313375	0.688	0.588	0.0996181	0.1	ExN.CA1.2	Mcph1
4.31e-06	0.239137	0.734	0.59	0.100159	0.144	ExN.CA1.2	Lcorl
4.34e-06	0.313872	0.717	0.619	0.100838	0.098	ExN.CA1.2	Abhd12
4.34e-06	0.232423	0.854	0.735	0.100937	0.119	ExN.CA1.2	Gfod1
4.4e-06	0.307615	0.395	0.254	0.102339	0.141	ExN.CA1.2	Cdh7
4.42e-06	0.293076	1	1	0.102712	0	ExN.CA1.2	Nalf1
4.42e-06	0.26228	0.62	0.479	0.102719	0.141	ExN.CA1.2	Dzip3
4.44e-06	-0.362057	0.587	0.595	0.103243	-0.008	ExN.CA1.2	Ulk4
4.49e-06	-0.267788	0.811	0.82	0.104464	-0.009	ExN.CA1.2	Hectd4
4.51e-06	0.151689	0.833	0.706	0.104756	0.127	ExN.CA1.2	Dis3l2
4.59e-06	0.213031	0.787	0.653	0.106812	0.134	ExN.CA1.2	Ube2k
4.66e-06	-0.157876	0.066	0.156	0.108315	-0.09	ExN.CA1.2	B4galnt1
4.67e-06	0.327872	0.71	0.572	0.108484	0.138	ExN.CA1.2	Pbx3
4.68e-06	0.28962	0.279	0.154	0.10874	0.125	ExN.CA1.2	9130019P16Rik
4.7e-06	0.499959	0.446	0.339	0.109188	0.107	ExN.CA1.2	Tmem108
4.72e-06	0.235768	0.969	0.906	0.109679	0.063	ExN.CA1.2	Slc4a10
4.76e-06	0.207019	1	0.978	0.110626	0.022	ExN.CA1.2	Gm2164
4.81e-06	0.14158	0.139	0.053	0.111891	0.086	ExN.CA1.2	Lrrc3b
4.85e-06	0.181597	0.209	0.1	0.112721	0.109	ExN.CA1.2	Tspan12
4.94e-06	0.253752	0.474	0.325	0.114904	0.149	ExN.CA1.2	Ttc39c
5.04e-06	-0.125002	0.043	0.122	0.117091	-0.079	ExN.CA1.2	Med25
5.05e-06	0.232501	0.357	0.223	0.117459	0.134	ExN.CA1.2	Acsl3
5.08e-06	0.244598	0.712	0.568	0.118	0.144	ExN.CA1.2	Mpped2
5.11e-06	-0.263558	0.32	0.434	0.118725	-0.114	ExN.CA1.2	Rapgefl1
5.11e-06	0.348814	0.986	0.962	0.118782	0.024	ExN.CA1.2	Erc2
5.13e-06	0.105026	0.97	0.898	0.119187	0.072	ExN.CA1.2	Cmip
5.14e-06	0.162833	0.915	0.813	0.119591	0.102	ExN.CA1.2	Ssbp2
5.23e-06	-0.149073	0.072	0.169	0.121683	-0.097	ExN.CA1.2	Camsap3
5.26e-06	0.457159	0.351	0.234	0.122259	0.117	ExN.CA1.2	Stxbp6
5.33e-06	0.252919	0.92	0.835	0.123901	0.085	ExN.CA1.2	Trappc9
5.38e-06	-0.0412777	0.893	0.804	0.125032	0.089	ExN.CA1.2	Bcl11b
5.47e-06	-0.160555	0.066	0.14	0.12723	-0.074	ExN.CA1.2	Gigyf1
5.62e-06	0.44972	0.271	0.169	0.130765	0.102	ExN.CA1.2	Gm49678
5.63e-06	-0.197349	0.146	0.252	0.130834	-0.106	ExN.CA1.2	Cic
5.71e-06	-0.263308	0.386	0.486	0.132808	-0.1	ExN.CA1.2	Gpi1
5.81e-06	0.213778	0.904	0.804	0.135051	0.1	ExN.CA1.2	Wdr7
5.88e-06	0.282221	0.989	0.958	0.136734	0.031	ExN.CA1.2	Slc24a2
5.89e-06	-0.134058	0.043	0.12	0.137017	-0.077	ExN.CA1.2	Golga2
6e-06	-0.16508	0.083	0.176	0.139421	-0.093	ExN.CA1.2	Tjap1
6.01e-06	0.271856	0.899	0.811	0.13978	0.088	ExN.CA1.2	St7
6.07e-06	0.18212	0.934	0.844	0.141188	0.09	ExN.CA1.2	Ppp2r2c
6.08e-06	0.244215	0.923	0.829	0.141242	0.094	ExN.CA1.2	Tox
6.08e-06	-0.28639	0.753	0.788	0.141289	-0.035	ExN.CA1.2	Kcnq2
6.12e-06	-0.425653	0.228	0.365	0.142245	-0.137	ExN.CA1.2	Megf11
6.17e-06	0.252387	0.531	0.383	0.143366	0.148	ExN.CA1.2	Chpt1
6.17e-06	0.0902905	0.888	0.78	0.143381	0.108	ExN.CA1.2	Slco3a1
6.17e-06	-0.192791	0.098	0.187	0.143451	-0.089	ExN.CA1.2	Pcgf2
6.23e-06	-0.204843	0.173	0.274	0.144901	-0.101	ExN.CA1.2	Mcoln1
6.26e-06	0.262932	0.991	0.962	0.14547	0.029	ExN.CA1.2	Ube2e2
6.29e-06	0.209133	0.37	0.232	0.146117	0.138	ExN.CA1.2	Epdr1
6.39e-06	0.310533	0.732	0.606	0.148522	0.126	ExN.CA1.2	Lin7a
6.44e-06	0.234969	1	0.989	0.149793	0.011	ExN.CA1.2	Ank3
6.46e-06	-0.255363	0.872	0.871	0.150137	0.001	ExN.CA1.2	Dnm1
6.64e-06	0.323364	0.386	0.261	0.154337	0.125	ExN.CA1.2	Adam18
6.65e-06	0.275269	0.683	0.546	0.154603	0.137	ExN.CA1.2	Mgat5
6.7e-06	0.209208	0.672	0.526	0.155708	0.146	ExN.CA1.2	Map7d2
6.71e-06	0.258006	0.365	0.229	0.156101	0.136	ExN.CA1.2	Plcb4
6.74e-06	0.224594	0.542	0.392	0.156796	0.15	ExN.CA1.2	Ldlrad3
6.75e-06	0.268915	0.63	0.49	0.15694	0.14	ExN.CA1.2	Rb1
6.79e-06	0.0213319	0.841	0.733	0.157875	0.108	ExN.CA1.2	Cit
6.82e-06	0.303682	0.321	0.192	0.158595	0.129	ExN.CA1.2	Rasgrf2
6.96e-06	0.161315	0.932	0.84	0.161706	0.092	ExN.CA1.2	Adgra1
6.98e-06	0.216363	0.424	0.281	0.162274	0.143	ExN.CA1.2	Slc30a9
7.07e-06	-0.00823431	0.954	0.878	0.164325	0.076	ExN.CA1.2	Dock4
7.16e-06	0.152971	0.805	0.675	0.166421	0.13	ExN.CA1.2	Usp32
7.45e-06	-0.209315	0.184	0.31	0.173141	-0.126	ExN.CA1.2	Cers1
7.56e-06	-0.174111	0.112	0.22	0.175817	-0.108	ExN.CA1.2	Ciz1
7.58e-06	0.387718	0.34	0.214	0.176235	0.126	ExN.CA1.2	Olfm3
7.61e-06	-0.100259	0.902	0.833	0.176932	0.069	ExN.CA1.2	Mrtfa
7.65e-06	0.266317	0.693	0.557	0.177944	0.136	ExN.CA1.2	Lrrc8c
7.69e-06	0.265429	0.924	0.842	0.178733	0.082	ExN.CA1.2	Gse1
7.7e-06	-0.209428	0.406	0.439	0.178967	-0.033	ExN.CA1.2	Slf2
7.73e-06	0.0437575	0.775	0.657	0.179714	0.118	ExN.CA1.2	Babam2
7.99e-06	-0.0552227	0.844	0.757	0.18583	0.087	ExN.CA1.2	Tnrc6c
8.25e-06	0.290116	0.932	0.869	0.191716	0.063	ExN.CA1.2	9330162G02Rik
8.31e-06	0.202796	0.953	0.878	0.193081	0.075	ExN.CA1.2	Map1b
8.36e-06	0.349039	0.693	0.579	0.194379	0.114	ExN.CA1.2	Nrg2
8.36e-06	-0.42109	0.23	0.363	0.194459	-0.133	ExN.CA1.2	Adra1a
8.42e-06	0.11884	0.928	0.833	0.195663	0.095	ExN.CA1.2	Stau2
8.48e-06	-0.227873	0.339	0.434	0.197053	-0.095	ExN.CA1.2	Hnrnpu
8.53e-06	0.154862	0.219	0.109	0.198295	0.11	ExN.CA1.2	Klrg1
8.54e-06	0.268214	0.498	0.354	0.198616	0.144	ExN.CA1.2	Dpysl3
8.58e-06	0.174578	0.605	0.459	0.199362	0.146	ExN.CA1.2	Kantr
8.62e-06	0.179603	0.444	0.303	0.20029	0.141	ExN.CA1.2	Ell2
8.66e-06	0.133566	0.973	0.906	0.201322	0.067	ExN.CA1.2	Pde4dip
8.7e-06	-0.188367	0.14	0.234	0.20215	-0.094	ExN.CA1.2	Safb2
8.7e-06	-0.217402	0.228	0.339	0.202317	-0.111	ExN.CA1.2	Tsc2
8.83e-06	-0.247129	0.417	0.55	0.205257	-0.133	ExN.CA1.2	Acin1
8.86e-06	0.165177	0.967	0.898	0.205921	0.069	ExN.CA1.2	Sorl1
8.86e-06	-0.212361	0.557	0.577	0.205935	-0.02	ExN.CA1.2	Rbm5
8.95e-06	0.214239	0.759	0.624	0.207955	0.135	ExN.CA1.2	Uri1
9.05e-06	0.17704	0.249	0.134	0.210373	0.115	ExN.CA1.2	Asah2
9.1e-06	-0.278094	0.424	0.535	0.211568	-0.111	ExN.CA1.2	Myo9b
9.11e-06	0.270216	0.997	0.98	0.211898	0.017	ExN.CA1.2	Lrfn5
9.15e-06	0.27486	0.309	0.207	0.212663	0.102	ExN.CA1.2	Ccdc171
9.17e-06	0.275945	0.636	0.548	0.21322	0.088	ExN.CA1.2	Acss2
9.17e-06	0.167731	0.969	0.9	0.213245	0.069	ExN.CA1.2	Syt16
9.58e-06	0.320409	0.261	0.151	0.222706	0.11	ExN.CA1.2	Bicc1
9.72e-06	0.18361	0.583	0.437	0.225939	0.146	ExN.CA1.2	Rab30
9.72e-06	-0.274303	0.594	0.661	0.226001	-0.067	ExN.CA1.2	Usp48
1.01e-05	0.192264	0.406	0.267	0.234666	0.139	ExN.CA1.2	Jade3
1.01e-05	0.209408	0.854	0.739	0.235483	0.115	ExN.CA1.2	Clasp1
1.02e-05	0.269044	0.531	0.392	0.236922	0.139	ExN.CA1.2	Usp13
1.03e-05	0.229078	0.365	0.252	0.239649	0.113	ExN.CA1.2	Bccip
1.05e-05	-0.240914	0.795	0.777	0.244544	0.018	ExN.CA1.2	Zmynd8
1.05e-05	-0.204344	0.891	0.857	0.244751	0.034	ExN.CA1.2	Kif1a
1.06e-05	-0.243031	0.518	0.555	0.246312	-0.037	ExN.CA1.2	Rbm39
1.06e-05	0.202211	0.45	0.307	0.247021	0.143	ExN.CA1.2	Txnl1
1.09e-05	0.211462	0.761	0.626	0.252982	0.135	ExN.CA1.2	Fmn1
1.09e-05	0.283579	1	0.998	0.254352	0.002	ExN.CA1.2	Celf2
1.1e-05	0.164498	0.153	0.067	0.255447	0.086	ExN.CA1.2	Vmn2r1
1.14e-05	-0.180581	0.132	0.234	0.264419	-0.102	ExN.CA1.2	Cep170b
1.15e-05	0.19996	0.534	0.388	0.266377	0.146	ExN.CA1.2	Kpna4
1.16e-05	0.260636	0.461	0.323	0.270375	0.138	ExN.CA1.2	Stxbp4
1.17e-05	0.282708	0.63	0.503	0.271001	0.127	ExN.CA1.2	Rab28
1.17e-05	0.254392	0.468	0.327	0.272739	0.141	ExN.CA1.2	Slc10a7
1.17e-05	0.195104	0.369	0.234	0.27301	0.135	ExN.CA1.2	Zfp182
1.18e-05	0.260336	0.913	0.835	0.273617	0.078	ExN.CA1.2	Zcchc7
1.19e-05	0.118305	0.94	0.853	0.27747	0.087	ExN.CA1.2	Atxn7l1
1.24e-05	-0.257164	0.512	0.579	0.288163	-0.067	ExN.CA1.2	Mast1
1.25e-05	-0.118038	0.039	0.114	0.28988	-0.075	ExN.CA1.2	Entr1
1.26e-05	0.289502	0.965	0.924	0.293659	0.041	ExN.CA1.2	Camk1d
1.26e-05	-0.4305	0.249	0.352	0.294015	-0.103	ExN.CA1.2	Arhgap26
1.27e-05	-0.159274	0.106	0.209	0.295898	-0.103	ExN.CA1.2	Dennd6b
1.28e-05	-0.222011	0.189	0.287	0.298225	-0.098	ExN.CA1.2	Slc44a2
1.28e-05	0.237966	0.254	0.138	0.298558	0.116	ExN.CA1.2	Dok5
1.29e-05	0.232675	0.375	0.243	0.300122	0.132	ExN.CA1.2	Atpsckmt
1.29e-05	0.303735	0.543	0.403	0.300627	0.14	ExN.CA1.2	Eda
1.29e-05	0.151259	0.691	0.552	0.301037	0.139	ExN.CA1.2	Numb
1.31e-05	0.311007	0.728	0.606	0.305534	0.122	ExN.CA1.2	Snca
1.32e-05	-0.137774	0.066	0.145	0.307548	-0.079	ExN.CA1.2	Ptms
1.33e-05	-0.226476	0.45	0.501	0.309564	-0.051	ExN.CA1.2	Ep400
1.33e-05	0.143962	0.987	0.938	0.310151	0.049	ExN.CA1.2	Unc79
1.34e-05	0.225905	0.709	0.57	0.310537	0.139	ExN.CA1.2	AW554918
1.35e-05	-0.15418	0.079	0.174	0.312773	-0.095	ExN.CA1.2	Gba2
1.35e-05	0.22129	0.994	0.955	0.314484	0.039	ExN.CA1.2	Fgf12
1.39e-05	0.300925	0.523	0.405	0.322204	0.118	ExN.CA1.2	Rasa3
1.42e-05	0.644033	0.518	0.381	0.329476	0.137	ExN.CA1.2	Grik1
1.42e-05	0.218643	0.465	0.323	0.329773	0.142	ExN.CA1.2	ENSMUSG00000120031
1.43e-05	-0.180417	0.713	0.688	0.333394	0.025	ExN.CA1.2	Dnmt3a
1.44e-05	0.229773	0.661	0.519	0.335248	0.142	ExN.CA1.2	Dkk3
1.45e-05	0.0725086	0.561	0.437	0.336412	0.124	ExN.CA1.2	Btbd7
1.45e-05	0.202344	0.406	0.269	0.336567	0.137	ExN.CA1.2	Grem2
1.47e-05	0.25918	0.735	0.606	0.341078	0.129	ExN.CA1.2	Limch1
1.47e-05	-0.215247	0.231	0.33	0.341296	-0.099	ExN.CA1.2	Ap3d1
1.47e-05	0.233526	0.644	0.501	0.341629	0.143	ExN.CA1.2	Arhgef10l
1.48e-05	0.278592	0.469	0.367	0.344004	0.102	ExN.CA1.2	Nxpe3
1.48e-05	0.233868	0.74	0.608	0.344676	0.132	ExN.CA1.2	Tbl1xr1
1.48e-05	-0.0139724	0.822	0.726	0.344914	0.096	ExN.CA1.2	Herc2
1.52e-05	-0.140777	0.074	0.154	0.353335	-0.08	ExN.CA1.2	Mief1
1.53e-05	-0.222416	0.753	0.739	0.355479	0.014	ExN.CA1.2	Mir124a-1hg
1.54e-05	0.151001	0.814	0.69	0.358177	0.124	ExN.CA1.2	Stxbp5
1.56e-05	-0.178603	0.14	0.214	0.362362	-0.074	ExN.CA1.2	Miga2
1.56e-05	0.131464	0.164	0.071	0.362844	0.093	ExN.CA1.2	Fam3c
1.56e-05	0.195349	0.806	0.682	0.36301	0.124	ExN.CA1.2	St3gal3
1.57e-05	-0.161417	0.104	0.207	0.364318	-0.103	ExN.CA1.2	Klc2
1.57e-05	0.239587	0.935	0.862	0.365412	0.073	ExN.CA1.2	Hecw2
1.58e-05	0.379416	0.677	0.568	0.368435	0.109	ExN.CA1.2	Adcy8
1.59e-05	0.170391	0.987	0.94	0.369495	0.047	ExN.CA1.2	Nrcam
1.6e-05	0.297995	0.778	0.657	0.372443	0.121	ExN.CA1.2	Tmtc1
1.61e-05	0.208478	0.78	0.653	0.373698	0.127	ExN.CA1.2	Scaf8
1.61e-05	0.105405	0.809	0.688	0.373802	0.121	ExN.CA1.2	Afdn
1.61e-05	0.266635	0.702	0.57	0.374307	0.132	ExN.CA1.2	Rsu1
1.62e-05	-0.180077	0.128	0.234	0.376498	-0.106	ExN.CA1.2	Mllt6
1.64e-05	0.564411	0.654	0.543	0.380587	0.111	ExN.CA1.2	Maml2
1.65e-05	0.2426	0.876	0.773	0.382736	0.103	ExN.CA1.2	Sh3rf3
1.68e-05	0.213655	0.493	0.354	0.390413	0.139	ExN.CA1.2	Qpct
1.71e-05	-0.26281	0.427	0.523	0.396462	-0.096	ExN.CA1.2	Ubr4
1.71e-05	0.221635	0.411	0.274	0.397372	0.137	ExN.CA1.2	Galnt10
1.73e-05	-0.11662	0.05	0.129	0.402508	-0.079	ExN.CA1.2	Slc9a5
1.77e-05	-0.102386	0.033	0.102	0.410695	-0.069	ExN.CA1.2	Lrrc45
1.78e-05	0.247772	0.606	0.468	0.413183	0.138	ExN.CA1.2	Pde3b
1.8e-05	0.244862	0.524	0.403	0.418435	0.121	ExN.CA1.2	Cyb5b
1.8e-05	0.243674	0.474	0.334	0.419004	0.14	ExN.CA1.2	Satb1
1.81e-05	-0.199096	0.2	0.323	0.421203	-0.123	ExN.CA1.2	Spred3
1.81e-05	0.263248	0.676	0.543	0.421762	0.133	ExN.CA1.2	Atg10
1.82e-05	-0.198038	0.187	0.269	0.422011	-0.082	ExN.CA1.2	Clip3
1.82e-05	0.410924	0.359	0.238	0.423801	0.121	ExN.CA1.2	Car10
1.88e-05	0.21562	0.531	0.388	0.436368	0.143	ExN.CA1.2	Rab8b
1.91e-05	-0.257204	0.528	0.604	0.443434	-0.076	ExN.CA1.2	Thra
1.92e-05	0.243724	0.556	0.421	0.446707	0.135	ExN.CA1.2	Ift57
1.92e-05	-0.329758	0.737	0.753	0.447069	-0.016	ExN.CA1.2	Peak1
1.93e-05	-0.206075	0.197	0.312	0.449012	-0.115	ExN.CA1.2	Aplp1
1.94e-05	-0.23198	0.324	0.412	0.449859	-0.088	ExN.CA1.2	Sfpq
1.95e-05	0.154853	0.395	0.265	0.453142	0.13	ExN.CA1.2	Irs1
1.98e-05	-0.156912	0.301	0.332	0.45978	-0.031	ExN.CA1.2	Socs7
1.99e-05	0.243855	0.879	0.782	0.462726	0.097	ExN.CA1.2	Amph
2.02e-05	0.238009	0.573	0.434	0.468765	0.139	ExN.CA1.2	Fam171b
2.05e-05	0.135061	0.789	0.664	0.477625	0.125	ExN.CA1.2	Arhgap35
2.06e-05	0.324975	0.762	0.668	0.478107	0.094	ExN.CA1.2	Far2
2.07e-05	-0.217985	0.195	0.307	0.480727	-0.112	ExN.CA1.2	Sf1
2.08e-05	0.225475	0.724	0.592	0.483852	0.132	ExN.CA1.2	Gabrg2
2.09e-05	0.0688757	0.965	0.895	0.485601	0.07	ExN.CA1.2	Galnt9
2.13e-05	0.169297	0.318	0.198	0.495	0.12	ExN.CA1.2	Gm19744
2.14e-05	0.258765	0.477	0.35	0.498605	0.127	ExN.CA1.2	Nck2
2.19e-05	-0.170636	0.876	0.842	0.509718	0.034	ExN.CA1.2	Pacsin1
2.2e-05	0.300703	0.594	0.457	0.510989	0.137	ExN.CA1.2	Kcnk9
2.22e-05	0.207932	0.75	0.619	0.516497	0.131	ExN.CA1.2	Mtmr7
2.26e-05	-0.296304	0.169	0.283	0.525738	-0.114	ExN.CA1.2	Socs2
2.28e-05	0.264471	0.641	0.523	0.529664	0.118	ExN.CA1.2	Eml4
2.31e-05	0.221738	0.669	0.532	0.536825	0.137	ExN.CA1.2	Rufy3
2.37e-05	0.325385	0.189	0.091	0.551555	0.098	ExN.CA1.2	Pdzrn3
2.39e-05	0.283807	1	1	0.556211	0	ExN.CA1.2	Dlg2
2.4e-05	-0.246231	0.406	0.481	0.557647	-0.075	ExN.CA1.2	Arf3
2.47e-05	0.192299	0.52	0.379	0.574422	0.141	ExN.CA1.2	Pkn2
2.5e-05	-0.109493	0.036	0.107	0.580417	-0.071	ExN.CA1.2	Matk
2.51e-05	0.251887	0.669	0.539	0.582809	0.13	ExN.CA1.2	Scg5
2.51e-05	-0.171693	0.131	0.234	0.583329	-0.103	ExN.CA1.2	Slc4a3
2.53e-05	-0.212788	0.263	0.363	0.589334	-0.1	ExN.CA1.2	Epn1
2.55e-05	-0.290695	0.679	0.699	0.592596	-0.02	ExN.CA1.2	Epha10
2.55e-05	0.0835972	0.898	0.8	0.593048	0.098	ExN.CA1.2	Tsc22d1
2.55e-05	-0.298323	0.928	0.924	0.593105	0.004	ExN.CA1.2	Ksr1
2.57e-05	0.182452	0.641	0.501	0.596786	0.14	ExN.CA1.2	Trip11
2.59e-05	0.054262	0.83	0.717	0.603277	0.113	ExN.CA1.2	Garem1
2.6e-05	0.463048	0.353	0.267	0.603543	0.086	ExN.CA1.2	Sema5a
2.69e-05	0.234242	0.978	0.929	0.62438	0.049	ExN.CA1.2	Fam135b
2.69e-05	0.214827	0.534	0.394	0.625993	0.14	ExN.CA1.2	Pik3ca
2.72e-05	-0.209415	0.405	0.454	0.631265	-0.049	ExN.CA1.2	Pnisr
2.82e-05	0.248774	0.729	0.601	0.655468	0.128	ExN.CA1.2	Gm26652
2.83e-05	-0.251411	0.803	0.811	0.658197	-0.008	ExN.CA1.2	Grik5
2.83e-05	-0.142746	0.091	0.187	0.658427	-0.096	ExN.CA1.2	Shfl
2.83e-05	0.184996	0.813	0.693	0.658678	0.12	ExN.CA1.2	Snx29
2.85e-05	-0.263601	0.45	0.539	0.663619	-0.089	ExN.CA1.2	Ddx17
2.86e-05	0.137295	0.973	0.911	0.664959	0.062	ExN.CA1.2	Nell2
2.86e-05	0.351751	0.37	0.247	0.66595	0.123	ExN.CA1.2	Mkx
2.87e-05	0.258982	0.891	0.808	0.667629	0.083	ExN.CA1.2	Lrrn2
2.9e-05	-0.253078	0.965	0.955	0.673445	0.01	ExN.CA1.2	Slc6a17
2.93e-05	0.0205183	0.565	0.452	0.681528	0.113	ExN.CA1.2	Smarca2
2.94e-05	0.208703	0.75	0.621	0.682552	0.129	ExN.CA1.2	Psmd14
2.99e-05	0.197626	0.866	0.759	0.695811	0.107	ExN.CA1.2	Cog5
2.99e-05	0.605673	0.729	0.633	0.696139	0.096	ExN.CA1.2	Trpm3
3.01e-05	0.134367	0.142	0.06	0.699273	0.082	ExN.CA1.2	Atp6v1c2
3.02e-05	-0.138379	0.071	0.136	0.700972	-0.065	ExN.CA1.2	Rps6kb2
3.07e-05	0.239019	0.765	0.644	0.71421	0.121	ExN.CA1.2	ENSMUSG00000120237
3.09e-05	-0.213302	0.213	0.316	0.717338	-0.103	ExN.CA1.2	Fbf1
3.09e-05	-0.101202	0.063	0.143	0.717829	-0.08	ExN.CA1.2	Hnrnpa1
3.09e-05	-0.211509	0.22	0.339	0.718538	-0.119	ExN.CA1.2	Kdm6b
3.11e-05	0.207064	0.71	0.577	0.721882	0.133	ExN.CA1.2	Nipbl
3.11e-05	0.264025	0.772	0.648	0.723436	0.124	ExN.CA1.2	Syn3
3.12e-05	0.284055	0.542	0.428	0.724816	0.114	ExN.CA1.2	Sgce
3.13e-05	0.274278	0.646	0.535	0.726665	0.111	ExN.CA1.2	Pcmtd1
3.15e-05	-0.237599	0.357	0.465	0.731829	-0.108	ExN.CA1.2	Dmtn
3.16e-05	-0.303117	0.465	0.532	0.733546	-0.067	ExN.CA1.2	Kcnn3
3.19e-05	0.251484	0.665	0.548	0.741673	0.117	ExN.CA1.2	Mef2a
3.19e-05	0.212062	0.334	0.209	0.74189	0.125	ExN.CA1.2	Cfap20dc
3.2e-05	-0.16425	0.14	0.218	0.745093	-0.078	ExN.CA1.2	Ehmt2
3.23e-05	0.196818	0.883	0.784	0.750459	0.099	ExN.CA1.2	Scaper
3.24e-05	0.108039	0.357	0.245	0.753216	0.112	ExN.CA1.2	Tmem44
3.26e-05	0.0387218	0.906	0.815	0.758852	0.091	ExN.CA1.2	Gpatch8
3.3e-05	0.172811	0.849	0.737	0.767288	0.112	ExN.CA1.2	Ecpas
3.31e-05	0.239264	0.676	0.546	0.769388	0.13	ExN.CA1.2	9930021J03Rik
3.34e-05	0.116757	0.154	0.069	0.77716	0.085	ExN.CA1.2	Diaph3
3.35e-05	0.276133	0.507	0.385	0.778474	0.122	ExN.CA1.2	Rnf182
3.37e-05	0.165368	0.998	0.973	0.783684	0.025	ExN.CA1.2	Prkcb
3.42e-05	-0.127946	0.057	0.131	0.794606	-0.074	ExN.CA1.2	Arhgef25
3.42e-05	0.236607	0.654	0.523	0.795184	0.131	ExN.CA1.2	Cert1
3.47e-05	0.186968	0.231	0.14	0.807089	0.091	ExN.CA1.2	Abcd3
3.55e-05	0.289226	0.995	0.982	0.825578	0.013	ExN.CA1.2	Nav3
3.56e-05	0.252546	0.805	0.693	0.828276	0.112	ExN.CA1.2	Slc39a11
3.58e-05	0.20345	0.411	0.278	0.831343	0.133	ExN.CA1.2	Mid2
3.6e-05	-0.230045	0.315	0.421	0.836688	-0.106	ExN.CA1.2	Dot1l
3.64e-05	-0.0895191	0.72	0.633	0.845906	0.087	ExN.CA1.2	Etv5
3.68e-05	-0.20499	0.222	0.314	0.854924	-0.092	ExN.CA1.2	Nek9
3.68e-05	0.0947024	0.764	0.644	0.855643	0.12	ExN.CA1.2	Arih1
3.76e-05	-0.179699	0.334	0.388	0.874113	-0.054	ExN.CA1.2	Ube2b
3.78e-05	-0.146518	0.099	0.187	0.878339	-0.088	ExN.CA1.2	Prkag1
3.78e-05	0.162136	0.707	0.575	0.878868	0.132	ExN.CA1.2	Uxs1
3.84e-05	0.214803	0.994	0.962	0.891978	0.032	ExN.CA1.2	Dlgap2
3.89e-05	0.233426	0.764	0.646	0.90385	0.118	ExN.CA1.2	Zfyve9
3.9e-05	0.248541	0.75	0.637	0.906473	0.113	ExN.CA1.2	Acot7
3.93e-05	0.231167	0.998	0.984	0.912857	0.014	ExN.CA1.2	Caln1
3.97e-05	0.0758547	0.948	0.871	0.922429	0.077	ExN.CA1.2	Prickle1
3.97e-05	-0.151166	0.072	0.156	0.923068	-0.084	ExN.CA1.2	Ankrd31
4.02e-05	-0.226768	0.994	0.987	0.935315	0.007	ExN.CA1.2	Shank1
4.03e-05	0.153206	0.488	0.356	0.937616	0.132	ExN.CA1.2	Pcgf5
4.06e-05	0.247915	0.422	0.292	0.944276	0.13	ExN.CA1.2	Crppa
4.07e-05	0.299584	0.512	0.394	0.945653	0.118	ExN.CA1.2	Gm31508
4.17e-05	-0.151555	0.088	0.176	0.97052	-0.088	ExN.CA1.2	Ephb6
4.24e-05	0.206278	0.639	0.503	0.986426	0.136	ExN.CA1.2	Gpatch2
4.25e-05	-0.144315	0.074	0.16	0.989074	-0.086	ExN.CA1.2	Fezf2
4.33e-05	-0.198937	0.202	0.303	1	-0.101	ExN.CA1.2	Supt5
4.34e-05	-0.137471	0.074	0.14	1	-0.066	ExN.CA1.2	Ssh3
4.35e-05	0.167832	0.956	0.886	1	0.07	ExN.CA1.2	Dennd1a
4.39e-05	0.167095	0.901	0.806	1	0.095	ExN.CA1.2	Zfand3
4.41e-05	-0.175547	0.735	0.713	1	0.022	ExN.CA1.2	Eps15l1
4.44e-05	0.262432	0.998	0.993	1	0.005	ExN.CA1.2	Grin2b
4.47e-05	0.195301	0.887	0.788	1	0.099	ExN.CA1.2	Gtdc1
4.54e-05	0.0865965	0.994	0.953	1	0.041	ExN.CA1.2	Ppm1e
4.58e-05	0.227655	0.734	0.61	1	0.124	ExN.CA1.2	Slc4a7
4.61e-05	0.0988307	0.855	0.748	1	0.107	ExN.CA1.2	Syt14
4.62e-05	-0.218369	0.25	0.367	1	-0.117	ExN.CA1.2	Sugp2
4.62e-05	-0.12774	0.734	0.684	1	0.05	ExN.CA1.2	Med13l
4.63e-05	0.206228	0.345	0.223	1	0.122	ExN.CA1.2	Agbl1
4.64e-05	0.153361	0.857	0.748	1	0.109	ExN.CA1.2	Itsn2
4.66e-05	0.235686	0.965	0.911	1	0.054	ExN.CA1.2	Khdrbs2
4.66e-05	0.0446698	0.917	0.831	1	0.086	ExN.CA1.2	Sbf2
4.71e-05	0.20828	0.696	0.566	1	0.13	ExN.CA1.2	Atxn7
4.72e-05	0.268353	0.617	0.483	1	0.134	ExN.CA1.2	Arap2
4.8e-05	-0.276228	0.628	0.677	1	-0.049	ExN.CA1.2	Flnb
4.83e-05	0.193286	0.984	0.944	1	0.04	ExN.CA1.2	Gabbr2
4.85e-05	0.27835	0.624	0.51	1	0.114	ExN.CA1.2	Pkia
4.9e-05	-0.255282	0.962	0.962	1	0	ExN.CA1.2	Camk2a
4.93e-05	0.246287	0.672	0.548	1	0.124	ExN.CA1.2	Hace1
4.94e-05	0.0962476	0.935	0.853	1	0.082	ExN.CA1.2	Ssh2
4.94e-05	-0.131101	0.902	0.851	1	0.051	ExN.CA1.2	B830012L14Rik
4.96e-05	0.186444	0.98	0.929	1	0.051	ExN.CA1.2	5730522E02Rik
4.96e-05	-0.274111	0.616	0.686	1	-0.07	ExN.CA1.2	Rasal1
5.07e-05	-0.145834	0.854	0.811	1	0.043	ExN.CA1.2	Sptbn4
5.09e-05	-0.215435	0.254	0.363	1	-0.109	ExN.CA1.2	Map3k12
5.1e-05	-0.0883247	0.696	0.626	1	0.07	ExN.CA1.2	Klhdc10
5.23e-05	-0.196688	0.192	0.296	1	-0.104	ExN.CA1.2	Tro
5.28e-05	-0.371691	0.455	0.543	1	-0.088	ExN.CA1.2	Plxnc1
5.31e-05	0.424797	0.682	0.601	1	0.081	ExN.CA1.2	Gm30382
5.34e-05	-0.218026	0.205	0.312	1	-0.107	ExN.CA1.2	Dpysl4
5.37e-05	0.14257	0.972	0.911	1	0.061	ExN.CA1.2	Dnah9
5.46e-05	-0.210535	0.205	0.292	1	-0.087	ExN.CA1.2	Capn15
5.49e-05	0.19841	0.537	0.401	1	0.136	ExN.CA1.2	Ptpn12
5.54e-05	0.255381	0.444	0.316	1	0.128	ExN.CA1.2	Stambpl1
5.56e-05	0.152036	0.902	0.808	1	0.094	ExN.CA1.2	Ncoa1
5.57e-05	-0.278414	0.506	0.599	1	-0.093	ExN.CA1.2	Kcnt1
5.6e-05	-0.265631	0.631	0.664	1	-0.033	ExN.CA1.2	Unc5a
5.62e-05	-0.148712	0.083	0.154	1	-0.071	ExN.CA1.2	Pom121
5.63e-05	-0.00980693	0.902	0.822	1	0.08	ExN.CA1.2	Klhl3
5.7e-05	0.209336	0.494	0.361	1	0.133	ExN.CA1.2	Nceh1
5.79e-05	0.133185	0.898	0.802	1	0.096	ExN.CA1.2	Pkp4
5.83e-05	0.0928994	0.835	0.726	1	0.109	ExN.CA1.2	Pan3
5.86e-05	-0.133259	0.071	0.154	1	-0.083	ExN.CA1.2	Npdc1
5.87e-05	0.128336	0.652	0.523	1	0.129	ExN.CA1.2	Rnf115
5.88e-05	-0.178953	0.557	0.557	1	0	ExN.CA1.2	Bptf
5.88e-05	-0.237622	0.323	0.428	1	-0.105	ExN.CA1.2	Stxbp2
5.94e-05	0.0548777	0.813	0.706	1	0.107	ExN.CA1.2	Pacs1
5.95e-05	0.213523	0.997	0.976	1	0.021	ExN.CA1.2	Lrrc7
6.04e-05	0.260243	0.517	0.399	1	0.118	ExN.CA1.2	Brwd3
6.08e-05	0.162269	0.811	0.695	1	0.116	ExN.CA1.2	Insr
6.13e-05	0.231889	0.562	0.428	1	0.134	ExN.CA1.2	Csgalnact1
6.13e-05	0.260357	0.858	0.768	1	0.09	ExN.CA1.2	Rgl1
6.13e-05	0.22959	0.652	0.521	1	0.131	ExN.CA1.2	5031425E22Rik
6.17e-05	-0.182882	0.15	0.254	1	-0.104	ExN.CA1.2	Zmym3
6.23e-05	0.106116	0.121	0.047	1	0.074	ExN.CA1.2	Arhgap28
6.31e-05	-0.117457	0.06	0.131	1	-0.071	ExN.CA1.2	Tle2
6.33e-05	0.175687	0.646	0.512	1	0.134	ExN.CA1.2	Asb3
6.34e-05	0.219222	0.321	0.218	1	0.103	ExN.CA1.2	Ephx4
6.35e-05	0.217342	0.962	0.906	1	0.056	ExN.CA1.2	Eml6
6.39e-05	-0.173108	0.187	0.303	1	-0.116	ExN.CA1.2	Taok2
6.41e-05	-0.134036	0.934	0.889	1	0.045	ExN.CA1.2	Eif4g3
6.41e-05	0.239741	0.636	0.508	1	0.128	ExN.CA1.2	Spred1
6.41e-05	0.138651	0.983	0.933	1	0.05	ExN.CA1.2	Tmem132b
6.49e-05	0.214608	0.943	0.88	1	0.063	ExN.CA1.2	App
6.59e-05	0.183414	0.515	0.381	1	0.134	ExN.CA1.2	Tmem29
6.61e-05	0.204503	0.893	0.804	1	0.089	ExN.CA1.2	Clec16a
6.68e-05	-0.116806	0.054	0.129	1	-0.075	ExN.CA1.2	Hdac6
6.72e-05	0.276265	0.586	0.468	1	0.118	ExN.CA1.2	Mta3
6.79e-05	0.253933	0.706	0.612	1	0.094	ExN.CA1.2	Polb
6.85e-05	-0.123805	0.08	0.167	1	-0.087	ExN.CA1.2	Traf7
6.95e-05	0.130621	0.283	0.176	1	0.107	ExN.CA1.2	Tmtc2
7e-05	0.227483	0.855	0.757	1	0.098	ExN.CA1.2	Ncoa7
7.03e-05	-0.134792	0.079	0.165	1	-0.086	ExN.CA1.2	Clk3
7.05e-05	0.289943	0.247	0.145	1	0.102	ExN.CA1.2	6530403H02Rik
7.08e-05	0.241362	0.584	0.457	1	0.127	ExN.CA1.2	Vopp1
7.1e-05	0.193494	0.619	0.486	1	0.133	ExN.CA1.2	Atp6v1h
7.11e-05	0.255783	0.983	0.955	1	0.028	ExN.CA1.2	Exoc6b
7.16e-05	-0.129313	0.071	0.149	1	-0.078	ExN.CA1.2	Fam171a2
7.26e-05	-0.268879	0.447	0.555	1	-0.108	ExN.CA1.2	B3gat1
7.4e-05	-0.170527	0.106	0.192	1	-0.086	ExN.CA1.2	Map4k2
7.42e-05	-0.209745	0.187	0.298	1	-0.111	ExN.CA1.2	Shisal1
7.43e-05	0.15721	0.175	0.085	1	0.09	ExN.CA1.2	Nacc2
7.44e-05	-0.14456	0.087	0.165	1	-0.078	ExN.CA1.2	ENSMUSG00000121395
7.48e-05	-0.188805	0.18	0.265	1	-0.085	ExN.CA1.2	Usp11
7.68e-05	-0.147869	0.109	0.192	1	-0.083	ExN.CA1.2	Trmt1
7.7e-05	0.188997	0.238	0.134	1	0.104	ExN.CA1.2	Camk2d
7.72e-05	-0.0149075	0.337	0.263	1	0.074	ExN.CA1.2	Fam20a
7.76e-05	0.242898	0.502	0.383	1	0.119	ExN.CA1.2	Mfsd6
7.8e-05	0.0704943	0.542	0.43	1	0.112	ExN.CA1.2	Raf1
7.87e-05	0.0781542	0.978	0.922	1	0.056	ExN.CA1.2	Slc24a3
7.94e-05	0.208728	0.493	0.361	1	0.132	ExN.CA1.2	Reps1
7.96e-05	0.236024	0.874	0.786	1	0.088	ExN.CA1.2	Adam23
8.06e-05	0.236924	0.591	0.47	1	0.121	ExN.CA1.2	Ide
8.19e-05	0.144284	0.159	0.073	1	0.086	ExN.CA1.2	Tgfbr1
8.24e-05	0.267347	0.483	0.374	1	0.109	ExN.CA1.2	Gpd2
8.39e-05	0.132967	0.546	0.419	1	0.127	ExN.CA1.2	Kif13a
8.45e-05	0.169594	0.987	0.947	1	0.04	ExN.CA1.2	Hivep2
8.61e-05	0.10783	0.132	0.056	1	0.076	ExN.CA1.2	Chn2
8.68e-05	0.237566	0.888	0.811	1	0.077	ExN.CA1.2	Lrba
8.68e-05	0.0221052	0.868	0.777	1	0.091	ExN.CA1.2	Ambra1
8.77e-05	-0.269702	0.54	0.644	1	-0.104	ExN.CA1.2	Baiap2
8.79e-05	0.219659	0.935	0.873	1	0.062	ExN.CA1.2	A330023F24Rik
8.79e-05	-0.288753	0.331	0.45	1	-0.119	ExN.CA1.2	Rph3a
8.8e-05	0.0117467	0.37	0.294	1	0.076	ExN.CA1.2	Cdc27
8.89e-05	0.124201	0.113	0.047	1	0.066	ExN.CA1.2	Gm5095
8.98e-05	0.213561	0.709	0.584	1	0.125	ExN.CA1.2	Hs2st1
9.04e-05	0.134477	0.189	0.098	1	0.091	ExN.CA1.2	Tafa4
9.06e-05	0.161315	0.822	0.71	1	0.112	ExN.CA1.2	Lzts1
9.09e-05	0.246759	0.943	0.895	1	0.048	ExN.CA1.2	Rasgef1a
9.19e-05	0.00793841	0.858	0.768	1	0.09	ExN.CA1.2	Msi2
9.19e-05	0.164809	0.378	0.256	1	0.122	ExN.CA1.2	Mrps28
9.21e-05	0.228948	0.824	0.722	1	0.102	ExN.CA1.2	Rap1gds1
9.23e-05	0.125864	0.52	0.394	1	0.126	ExN.CA1.2	Sertad2
9.29e-05	0.384904	0.339	0.236	1	0.103	ExN.CA1.2	Fyb2
9.29e-05	0.189548	0.978	0.931	1	0.047	ExN.CA1.2	4930578G10Rik
9.3e-05	-0.185255	0.219	0.325	1	-0.106	ExN.CA1.2	Tmem94
9.31e-05	-0.117648	0.05	0.12	1	-0.07	ExN.CA1.2	Hip1r
9.39e-05	0.198594	0.984	0.947	1	0.037	ExN.CA1.2	Akt3
9.41e-05	0.0936086	0.66	0.539	1	0.121	ExN.CA1.2	Trmt9b
9.44e-05	-0.221431	0.287	0.396	1	-0.109	ExN.CA1.2	L1cam
9.56e-05	-0.330116	0.35	0.441	1	-0.091	ExN.CA1.2	Rftn1
9.59e-05	0.16308	0.142	0.069	1	0.073	ExN.CA1.2	Gm17276
9.63e-05	0.0712814	0.953	0.882	1	0.071	ExN.CA1.2	Dapk1
9.68e-05	-0.113018	0.041	0.105	1	-0.064	ExN.CA1.2	Atosb
9.69e-05	0.314094	0.928	0.871	1	0.057	ExN.CA1.2	Ndst4
9.7e-05	0.149871	0.139	0.06	1	0.079	ExN.CA1.2	Shroom3
9.72e-05	-0.162495	0.151	0.234	1	-0.083	ExN.CA1.2	Ppib
9.78e-05	0.220027	0.909	0.829	1	0.08	ExN.CA1.2	Psd3
9.87e-05	0.140579	0.576	0.448	1	0.128	ExN.CA1.2	Xpo7
9.91e-05	0.214467	0.987	0.953	1	0.034	ExN.CA1.2	Rims2
9.92e-05	-0.194881	0.241	0.352	1	-0.111	ExN.CA1.2	Copa
9.98e-05	0.199737	0.698	0.572	1	0.126	ExN.CA1.2	Stim1
9.99e-05	-0.235951	0.457	0.523	1	-0.066	ExN.CA1.2	Sec61a2
0.0001	-0.149394	0.124	0.194	1	-0.07	ExN.CA1.2	Ccnl2
0.00010008	0.205898	0.294	0.185	1	0.109	ExN.CA1.2	Nwd1
0.000100231	0.249652	0.633	0.512	1	0.121	ExN.CA1.2	Klhl18
0.000100285	0.116757	0.159	0.076	1	0.083	ExN.CA1.2	Gbe1
0.000101409	-0.195937	0.899	0.878	1	0.021	ExN.CA1.2	Dlgap4
0.000101856	0.223706	0.372	0.267	1	0.105	ExN.CA1.2	4930570G19Rik
0.000102417	0.229198	0.688	0.568	1	0.12	ExN.CA1.2	Hook3
0.000103985	0.198898	0.343	0.227	1	0.116	ExN.CA1.2	Hsd17b4
0.000104909	0.20682	0.824	0.719	1	0.105	ExN.CA1.2	Dmxl1
0.000105035	-0.172623	0.118	0.194	1	-0.076	ExN.CA1.2	Grhl1
0.000105791	0.250787	0.483	0.37	1	0.113	ExN.CA1.2	Usp25
0.000106151	0.231041	0.427	0.303	1	0.124	ExN.CA1.2	Dcdc2a
0.000106277	0.144152	0.447	0.323	1	0.124	ExN.CA1.2	Prkci
0.000106337	0.171517	0.866	0.766	1	0.1	ExN.CA1.2	Dlg1
0.000106515	-0.219038	0.318	0.408	1	-0.09	ExN.CA1.2	L3mbtl1
0.000107048	0.132618	0.74	0.619	1	0.121	ExN.CA1.2	Cpeb4
0.000107507	0.0460623	0.591	0.483	1	0.108	ExN.CA1.2	Fbxw11
0.000107588	0.251635	0.42	0.305	1	0.115	ExN.CA1.2	C130026L21Rik
0.000108413	-0.245204	0.594	0.639	1	-0.045	ExN.CA1.2	Svop
0.000108437	0.204226	0.767	0.65	1	0.117	ExN.CA1.2	Gm49797
0.000108475	-0.168099	0.161	0.265	1	-0.104	ExN.CA1.2	Plppr2
0.000108986	-0.167537	0.159	0.247	1	-0.088	ExN.CA1.2	Cnot3
0.000110148	-0.130634	0.063	0.14	1	-0.077	ExN.CA1.2	Wdr66
0.000110805	0.287291	0.754	0.637	1	0.117	ExN.CA1.2	Pcdh7
0.000111558	0.177486	0.915	0.833	1	0.082	ExN.CA1.2	Fam168a
0.000111906	0.142493	0.203	0.109	1	0.094	ExN.CA1.2	Trib2
0.000112332	0.280855	0.945	0.889	1	0.056	ExN.CA1.2	Dgkb
0.000112883	-0.316207	0.967	0.949	1	0.018	ExN.CA1.2	Pde10a
0.000116451	-0.118301	0.05	0.12	1	-0.07	ExN.CA1.2	Nptxr
0.000118358	0.114433	0.677	0.555	1	0.122	ExN.CA1.2	Atf2
0.000118765	-0.161004	0.113	0.203	1	-0.09	ExN.CA1.2	Foxp4
0.000119555	0.224068	0.644	0.517	1	0.127	ExN.CA1.2	Cdyl2
0.000119638	0.00443144	0.731	0.637	1	0.094	ExN.CA1.2	Dyrk1a
0.000122395	0.0604142	0.899	0.811	1	0.088	ExN.CA1.2	Crim1
0.000122452	0.253324	0.994	0.964	1	0.03	ExN.CA1.2	Negr1
0.000122808	0.103378	0.101	0.038	1	0.063	ExN.CA1.2	B530045E10Rik
0.000124491	-0.172296	0.392	0.432	1	-0.04	ExN.CA1.2	Abca3
0.00012585	0.234299	0.624	0.497	1	0.127	ExN.CA1.2	Usp3
0.000126019	0.229497	0.825	0.731	1	0.094	ExN.CA1.2	Cnot2
0.000126304	-0.204858	0.372	0.448	1	-0.076	ExN.CA1.2	Sympk
0.000127299	-0.211862	0.246	0.345	1	-0.099	ExN.CA1.2	Cpne6
0.000128382	0.218188	0.414	0.296	1	0.118	ExN.CA1.2	Rala
0.000128594	0.238345	0.35	0.252	1	0.098	ExN.CA1.2	Fam184a
0.000129374	-0.163167	0.37	0.399	1	-0.029	ExN.CA1.2	Rabl6
0.00012991	-0.22734	0.472	0.557	1	-0.085	ExN.CA1.2	Fbxl20
0.000130162	0.207778	0.871	0.78	1	0.091	ExN.CA1.2	Aopep
0.000130467	-0.159916	0.142	0.234	1	-0.092	ExN.CA1.2	Eif4g1
0.000131171	0.120287	0.899	0.808	1	0.091	ExN.CA1.2	Cacna1d
0.000131595	0.20865	0.619	0.49	1	0.129	ExN.CA1.2	Nr3c1
0.000131684	-0.193654	0.244	0.343	1	-0.099	ExN.CA1.2	Pip5k1c
0.000133881	0.0643661	0.987	0.942	1	0.045	ExN.CA1.2	Otud7a
0.000134202	-0.240282	0.617	0.664	1	-0.047	ExN.CA1.2	Shank3
0.000134767	0.00274031	0.89	0.808	1	0.082	ExN.CA1.2	Dnaaf9
0.000135178	-0.124475	0.074	0.14	1	-0.066	ExN.CA1.2	Trafd1
0.000135247	0.187588	0.321	0.207	1	0.114	ExN.CA1.2	Cfap300
0.000135561	-0.153834	0.165	0.272	1	-0.107	ExN.CA1.2	R3hdm4
0.000135794	-0.203675	0.342	0.421	1	-0.079	ExN.CA1.2	Sf3b1
0.000136889	0.116878	0.608	0.486	1	0.122	ExN.CA1.2	Kcnk10
0.000137436	-0.237007	0.282	0.367	1	-0.085	ExN.CA1.2	Dpy19l3
0.000137819	0.253413	0.943	0.891	1	0.052	ExN.CA1.2	Aff3
0.00013871	0.230759	0.786	0.679	1	0.107	ExN.CA1.2	Arsb
0.000138802	0.198035	0.261	0.156	1	0.105	ExN.CA1.2	Mcc
0.000139792	0.333777	0.627	0.508	1	0.119	ExN.CA1.2	Kcnab1
0.000141048	-0.14398	0.074	0.154	1	-0.08	ExN.CA1.2	Ajm1
0.000141743	0.13676	0.419	0.298	1	0.121	ExN.CA1.2	Fam117b
0.000141873	-0.253995	0.746	0.735	1	0.011	ExN.CA1.2	Ptprn
0.000141963	0.19767	0.839	0.737	1	0.102	ExN.CA1.2	Ppm1h
0.000141991	0.256587	0.731	0.626	1	0.105	ExN.CA1.2	Vps13c
0.000142192	0.116165	0.86	0.759	1	0.101	ExN.CA1.2	Cpe
0.000143331	0.298703	0.918	0.875	1	0.043	ExN.CA1.2	B3galt1
0.000143579	0.215565	0.389	0.287	1	0.102	ExN.CA1.2	Myo6
0.000143652	0.0365142	0.121	0.073	1	0.048	ExN.CA1.2	Morn2
0.000143923	0.164633	0.959	0.898	1	0.061	ExN.CA1.2	Arhgap26.1
0.000143978	0.263259	0.206	0.116	1	0.09	ExN.CA1.2	Trpc6
0.000144601	-0.153744	0.685	0.661	1	0.024	ExN.CA1.2	Tnrc18
0.000146223	0.231403	0.482	0.361	1	0.121	ExN.CA1.2	Mal2
0.000146258	0.0625114	0.907	0.822	1	0.085	ExN.CA1.2	Dtnb
0.000149176	-0.0962222	0.92	0.864	1	0.056	ExN.CA1.2	Cacna1b
0.00014932	-0.226631	0.301	0.412	1	-0.111	ExN.CA1.2	Exd2
0.00015117	0.33016	0.392	0.278	1	0.114	ExN.CA1.2	Gm15155
0.000153392	0.15916	0.348	0.232	1	0.116	ExN.CA1.2	3010001F23Rik
0.000153499	0.210594	0.29	0.203	1	0.087	ExN.CA1.2	Acly
0.000153575	0.225533	0.706	0.59	1	0.116	ExN.CA1.2	Scfd2
0.000154833	0.126624	0.605	0.481	1	0.124	ExN.CA1.2	Wdr70
0.000155426	0.122343	0.965	0.904	1	0.061	ExN.CA1.2	Atp2b1
0.000156293	0.212849	0.265	0.16	1	0.105	ExN.CA1.2	Gm53013
0.000157698	0.171139	0.91	0.829	1	0.081	ExN.CA1.2	Kmt2c
0.000157704	0.197964	0.351	0.245	1	0.106	ExN.CA1.2	Gm8091
0.000157855	0.196409	0.334	0.223	1	0.111	ExN.CA1.2	Ndfip2
0.000158088	0.261626	0.561	0.443	1	0.118	ExN.CA1.2	Pola1
0.000159327	-0.138871	0.146	0.212	1	-0.066	ExN.CA1.2	Fbrs
0.000159651	-0.174346	0.165	0.265	1	-0.1	ExN.CA1.2	Caskin1
0.000160628	0.235259	0.808	0.713	1	0.095	ExN.CA1.2	Cask
0.000160971	-0.130601	0.732	0.693	1	0.039	ExN.CA1.2	Pafah1b1
0.000162584	-0.109726	0.058	0.131	1	-0.073	ExN.CA1.2	Sox12
0.000162799	0.170253	0.583	0.454	1	0.129	ExN.CA1.2	Zdhhc20
0.00016371	-0.293847	0.554	0.57	1	-0.016	ExN.CA1.2	Cdk8
0.000164001	0.214199	0.928	0.86	1	0.068	ExN.CA1.2	Bcl11a
0.000165085	0.228354	0.888	0.813	1	0.075	ExN.CA1.2	Ttll11
0.000165481	0.16109	0.82	0.713	1	0.107	ExN.CA1.2	Reep1
0.000166266	0.190243	0.405	0.283	1	0.122	ExN.CA1.2	Wrn
0.000166288	0.134441	0.811	0.702	1	0.109	ExN.CA1.2	Zfp148
0.000166822	0.0446673	0.926	0.849	1	0.077	ExN.CA1.2	Farp1
0.000167155	-0.142185	0.137	0.236	1	-0.099	ExN.CA1.2	Sbno2
0.00016731	0.106027	0.128	0.058	1	0.07	ExN.CA1.2	Dnah10
0.00016743	0.0965882	0.83	0.726	1	0.104	ExN.CA1.2	Fam219a
0.000167612	0.229116	0.444	0.323	1	0.121	ExN.CA1.2	Hlcs
0.000167879	0.165737	0.843	0.739	1	0.104	ExN.CA1.2	Cdkl5
0.000168467	0.282996	0.997	0.998	1	-0.001	ExN.CA1.2	Asic2
0.000169029	0.125671	1	0.98	1	0.02	ExN.CA1.2	Kcnma1
0.000170031	-0.0978658	0.05	0.12	1	-0.07	ExN.CA1.2	Grina
0.000170718	0.141591	0.589	0.463	1	0.126	ExN.CA1.2	Cdc73
0.000171342	0.313911	0.746	0.653	1	0.093	ExN.CA1.2	Htr4
0.000171388	-0.259867	0.814	0.833	1	-0.019	ExN.CA1.2	Nav1
0.000172025	-0.129522	0.082	0.165	1	-0.083	ExN.CA1.2	Hdac1
0.000176791	0.134804	0.787	0.675	1	0.112	ExN.CA1.2	Mast2
0.000177565	0.167822	0.666	0.541	1	0.125	ExN.CA1.2	Tcaf1
0.000181875	0.214982	0.502	0.379	1	0.123	ExN.CA1.2	Bphl
0.000181885	-0.156206	0.348	0.392	1	-0.044	ExN.CA1.2	Luc7l3
0.000183472	0.130725	0.181	0.094	1	0.087	ExN.CA1.2	4930544I03Rik
0.000184995	-0.133469	0.131	0.218	1	-0.087	ExN.CA1.2	Snapc4
0.000186609	-0.143571	0.101	0.18	1	-0.079	ExN.CA1.2	Flot1
0.000186878	-0.200481	0.244	0.336	1	-0.092	ExN.CA1.2	Cry2
0.000188307	0.0396747	0.142	0.08	1	0.062	ExN.CA1.2	Adamts18
0.000188951	0.250452	0.827	0.744	1	0.083	ExN.CA1.2	Nsg2
0.000189105	-0.0117698	0.562	0.474	1	0.088	ExN.CA1.2	Prkaa1
0.000190491	-0.151566	0.099	0.185	1	-0.086	ExN.CA1.2	Gm26604
0.000191153	-0.205594	0.424	0.49	1	-0.066	ExN.CA1.2	Ilf3
0.000191861	0.269179	0.528	0.425	1	0.103	ExN.CA1.2	Hycc1
0.000193494	0.211098	0.375	0.261	1	0.114	ExN.CA1.2	Psma2
0.00019409	0.261033	0.463	0.35	1	0.113	ExN.CA1.2	Neto2
0.000194102	0.0936495	0.817	0.713	1	0.104	ExN.CA1.2	Jmjd1c
0.000194326	-0.299629	0.528	0.595	1	-0.067	ExN.CA1.2	Dpysl5
0.000194563	0.15127	0.548	0.423	1	0.125	ExN.CA1.2	Rnf217
0.000194583	0.220035	0.598	0.481	1	0.117	ExN.CA1.2	Map3k2
0.000197098	0.139696	0.165	0.087	1	0.078	ExN.CA1.2	Cdk6
0.000198267	-0.231493	0.454	0.55	1	-0.096	ExN.CA1.2	Madd
0.000200363	-0.138057	0.093	0.176	1	-0.083	ExN.CA1.2	Bop1
0.000200996	-0.204072	0.291	0.396	1	-0.105	ExN.CA1.2	Rfx1
0.000201131	0.114547	0.145	0.067	1	0.078	ExN.CA1.2	Wdr88
0.00020152	0.156023	0.737	0.619	1	0.118	ExN.CA1.2	Ctxnd1
0.000201847	0.216934	0.723	0.612	1	0.111	ExN.CA1.2	Trim44
0.000202347	0.373884	0.38	0.272	1	0.108	ExN.CA1.2	Glis3
0.000202396	0.252592	0.794	0.697	1	0.097	ExN.CA1.2	Pakap
0.00020305	0.239549	0.517	0.401	1	0.116	ExN.CA1.2	Pgr
0.000203157	0.18316	0.682	0.559	1	0.123	ExN.CA1.2	Rps6ka3
0.000205254	0.127655	0.986	0.942	1	0.044	ExN.CA1.2	Thrb
0.000206352	0.0398028	0.126	0.076	1	0.05	ExN.CA1.2	Cyp4f13
0.000207578	0.157285	0.876	0.782	1	0.094	ExN.CA1.2	Nalcn
0.000208582	0.137773	0.23	0.134	1	0.096	ExN.CA1.2	Rnf144a
0.000209245	0.0786624	0.962	0.9	1	0.062	ExN.CA1.2	Rbfox2
0.000209512	0.201124	0.761	0.648	1	0.113	ExN.CA1.2	Cop1
0.000211446	-0.17734	0.339	0.37	1	-0.031	ExN.CA1.2	Dlg5
0.000212632	0.101682	0.699	0.584	1	0.115	ExN.CA1.2	Gm21992
0.000213554	0.181449	0.576	0.45	1	0.126	ExN.CA1.2	Acer3
0.000216711	0.0783636	0.915	0.833	1	0.082	ExN.CA1.2	Mical3
0.000217686	-0.129158	0.444	0.425	1	0.019	ExN.CA1.2	Banp
0.000217752	0.242384	0.918	0.853	1	0.065	ExN.CA1.2	Syn2
0.000217821	0.064374	0.391	0.296	1	0.095	ExN.CA1.2	Entpd7
0.000217855	0.218332	0.687	0.577	1	0.11	ExN.CA1.2	Sos1
0.000219675	0.275489	0.945	0.904	1	0.041	ExN.CA1.2	Klhl29
0.000220545	0.213799	0.759	0.65	1	0.109	ExN.CA1.2	Stx8
0.000222079	0.282987	0.101	0.042	1	0.059	ExN.CA1.2	Tmem196
0.000223667	0.121268	0.874	0.78	1	0.094	ExN.CA1.2	Elmod1
0.000224631	0.126683	0.729	0.612	1	0.117	ExN.CA1.2	Fbxo11
0.000228396	-0.0997574	0.06	0.131	1	-0.071	ExN.CA1.2	Pfkl
0.000228846	0.205906	0.431	0.31	1	0.121	ExN.CA1.2	Siah3
0.000232052	0.203776	0.466	0.343	1	0.123	ExN.CA1.2	E130308A19Rik
0.000232707	0.226566	0.389	0.281	1	0.108	ExN.CA1.2	Arhgap5
0.000233521	0.200158	0.643	0.521	1	0.122	ExN.CA1.2	Bmpr2
0.000233664	0.161512	0.685	0.563	1	0.122	ExN.CA1.2	Usp46
0.000234651	-0.211188	0.376	0.472	1	-0.096	ExN.CA1.2	Slc17a7
0.00023536	0.0927306	0.839	0.739	1	0.1	ExN.CA1.2	Dcaf6
0.000236971	0.215229	0.543	0.421	1	0.122	ExN.CA1.2	Dtnbp1
0.000238484	-0.115141	0.061	0.134	1	-0.073	ExN.CA1.2	Rabl2
0.000240292	0.190334	0.465	0.343	1	0.122	ExN.CA1.2	Olfr1564
0.000240944	0.172843	0.573	0.448	1	0.125	ExN.CA1.2	Dnajb4
0.000241168	0.232279	0.63	0.528	1	0.102	ExN.CA1.2	Wdr37
0.000241334	-0.156598	0.17	0.238	1	-0.068	ExN.CA1.2	Ezh1
0.00024317	0.220675	0.717	0.599	1	0.118	ExN.CA1.2	Rbms3
0.000243359	0.0548317	0.767	0.664	1	0.103	ExN.CA1.2	Cacna1i
0.000243406	0.0981339	0.112	0.045	1	0.067	ExN.CA1.2	Irag2
0.000246481	0.227419	0.663	0.55	1	0.113	ExN.CA1.2	Desi2
0.000247064	0.121779	0.865	0.768	1	0.097	ExN.CA1.2	Tom1l2
0.000248425	0.243165	0.636	0.519	1	0.117	ExN.CA1.2	Tspan7
0.000251267	-0.168835	0.176	0.278	1	-0.102	ExN.CA1.2	Csnk1d
0.000251831	-0.2284	0.981	0.958	1	0.023	ExN.CA1.2	Cacna1e
0.000255004	0.164216	0.772	0.659	1	0.113	ExN.CA1.2	St8sia1
0.000257208	-0.0558457	0.942	0.886	1	0.056	ExN.CA1.2	Pcnx2
0.000258032	-0.14018	0.061	0.131	1	-0.07	ExN.CA1.2	Tnxb
0.000258904	-0.0269611	0.8	0.719	1	0.081	ExN.CA1.2	Kmt2e
0.000260354	0.0761847	0.669	0.559	1	0.11	ExN.CA1.2	Tlk2
0.000260869	0.196162	0.787	0.679	1	0.108	ExN.CA1.2	Ralgapa2
0.000262421	0.167358	0.901	0.817	1	0.084	ExN.CA1.2	Vti1a
0.000263691	-0.145635	0.124	0.216	1	-0.092	ExN.CA1.2	Slc27a1
0.000266379	-0.150652	0.109	0.185	1	-0.076	ExN.CA1.2	Safb
0.000267409	0.210056	0.343	0.234	1	0.109	ExN.CA1.2	Abcc8
0.000267774	0.380267	0.764	0.675	1	0.089	ExN.CA1.2	Rfx3
0.000268347	-0.186398	0.498	0.517	1	-0.019	ExN.CA1.2	Coro7
0.000271343	0.168682	0.394	0.276	1	0.118	ExN.CA1.2	Lgr4
0.000272989	0.248632	0.545	0.454	1	0.091	ExN.CA1.2	Lrrc8b
0.000275676	0.150253	0.987	0.949	1	0.038	ExN.CA1.2	Khdrbs3
0.000276141	0.303645	0.539	0.423	1	0.116	ExN.CA1.2	Sphkap
0.000276782	0.215644	0.335	0.243	1	0.092	ExN.CA1.2	Tpcn2
0.00027737	0.126632	0.164	0.082	1	0.082	ExN.CA1.2	Psg16
0.000280603	0.20149	0.764	0.657	1	0.107	ExN.CA1.2	Ppp6r3
0.000280725	0.0717219	0.233	0.156	1	0.077	ExN.CA1.2	Tmem68
0.00028171	0.17585	0.868	0.777	1	0.091	ExN.CA1.2	C2cd5
0.00028439	0.192193	0.628	0.506	1	0.122	ExN.CA1.2	Ube2ql1
0.000285349	0.13633	0.148	0.073	1	0.075	ExN.CA1.2	Peli2
0.000286648	-0.271583	0.677	0.719	1	-0.042	ExN.CA1.2	Grk3
0.000286739	0.181859	0.756	0.644	1	0.112	ExN.CA1.2	Mkln1
0.0002918	-0.18217	0.205	0.296	1	-0.091	ExN.CA1.2	Naa25
0.000292572	0.233924	0.992	0.973	1	0.019	ExN.CA1.2	Cttnbp2
0.000294238	-0.132309	0.065	0.127	1	-0.062	ExN.CA1.2	Wdr13
0.000296682	0.306129	0.408	0.301	1	0.107	ExN.CA1.2	Thsd7a
0.00029743	0.108216	0.104	0.04	1	0.064	ExN.CA1.2	Srd5a1
0.000298509	0.176304	0.381	0.265	1	0.116	ExN.CA1.2	Mtx2
0.000299097	-0.16371	0.151	0.243	1	-0.092	ExN.CA1.2	Mta1
0.000299556	0.237431	0.828	0.737	1	0.091	ExN.CA1.2	C130071C03Rik
0.000301518	-0.0821211	0.411	0.385	1	0.026	ExN.CA1.2	Arpc2
0.000303139	0.133956	0.202	0.111	1	0.091	ExN.CA1.2	Mospd2
0.000305205	0.123956	0.631	0.512	1	0.119	ExN.CA1.2	Dipk1a
0.000309015	-0.164744	0.178	0.281	1	-0.103	ExN.CA1.2	Trpm2
0.000310788	0.482122	0.967	0.938	1	0.029	ExN.CA1.2	Lrp1b
0.000311293	0.23011	0.827	0.728	1	0.099	ExN.CA1.2	Etv1
0.000313613	0.258472	0.781	0.708	1	0.073	ExN.CA1.2	1700025G04Rik
0.000313826	0.102175	0.112	0.047	1	0.065	ExN.CA1.2	Gm28411
0.000314942	0.189456	0.756	0.644	1	0.112	ExN.CA1.2	Mitf
0.00031821	-0.170311	0.197	0.274	1	-0.077	ExN.CA1.2	Mboat7
0.000320638	0.200399	0.493	0.385	1	0.108	ExN.CA1.2	Lrmda
0.000321197	-0.0850036	0.562	0.506	1	0.056	ExN.CA1.2	Fndc3b
0.000321324	0.199543	0.89	0.811	1	0.079	ExN.CA1.2	Ppp1r9a
0.0003225	0.104759	0.865	0.771	1	0.094	ExN.CA1.2	Arhgap44
0.000325467	-0.198457	0.34	0.432	1	-0.092	ExN.CA1.2	Ndst1
0.000326033	0.179824	0.546	0.423	1	0.123	ExN.CA1.2	Spopl
0.000326561	-0.197903	0.304	0.372	1	-0.068	ExN.CA1.2	Faim2
0.000326708	0.201877	0.447	0.332	1	0.115	ExN.CA1.2	Uchl3
0.000327258	0.183853	0.86	0.768	1	0.092	ExN.CA1.2	Susd4
0.00032808	0.157483	0.507	0.385	1	0.122	ExN.CA1.2	Cd46
0.000331658	-0.092254	0.778	0.715	1	0.063	ExN.CA1.2	Map4k3
0.000332732	0.179807	0.775	0.666	1	0.109	ExN.CA1.2	Zc3h12b
0.000332856	0.170709	0.409	0.292	1	0.117	ExN.CA1.2	Pls1
0.000336764	-0.114179	0.047	0.107	1	-0.06	ExN.CA1.2	Rpap1
0.000337582	0.184142	0.625	0.503	1	0.122	ExN.CA1.2	Bach2
0.000340343	0.0647676	0.835	0.739	1	0.096	ExN.CA1.2	Kat6b
0.000341004	0.0430447	0.594	0.492	1	0.102	ExN.CA1.2	Rras2
0.000342379	-0.11597	0.061	0.118	1	-0.057	ExN.CA1.2	Gba
0.000342561	0.100667	0.146	0.071	1	0.075	ExN.CA1.2	Gm46392
0.000350372	0.251875	0.578	0.481	1	0.097	ExN.CA1.2	Wdpcp
0.000351744	-0.212547	0.405	0.461	1	-0.056	ExN.CA1.2	Sirpa
0.000352569	0.207279	0.592	0.472	1	0.12	ExN.CA1.2	Klf7
0.000357224	0.13232	0.672	0.555	1	0.117	ExN.CA1.2	N4bp2l2
0.00035743	-0.11367	0.071	0.127	1	-0.056	ExN.CA1.2	5730455P16Rik
0.000357839	-0.122759	0.087	0.167	1	-0.08	ExN.CA1.2	Cacnb3
0.000358949	-0.126255	0.094	0.174	1	-0.08	ExN.CA1.2	Rhof
0.000360126	0.107552	0.186	0.102	1	0.084	ExN.CA1.2	ENSMUSG00000121388
0.000360542	0.0963649	0.25	0.163	1	0.087	ExN.CA1.2	Slc17a6
0.000360566	-0.348812	0.263	0.363	1	-0.1	ExN.CA1.2	Igsf21
0.000360744	0.0347099	0.869	0.784	1	0.085	ExN.CA1.2	Kansl1
0.00036087	-0.201366	0.885	0.86	1	0.025	ExN.CA1.2	Arnt2
0.000362186	-0.186126	0.202	0.301	1	-0.099	ExN.CA1.2	Actl6b
0.000363483	0.164072	0.819	0.717	1	0.102	ExN.CA1.2	Atp9a
0.000364973	-0.148705	0.132	0.218	1	-0.086	ExN.CA1.2	Gcn1
0.000366653	-0.21827	0.463	0.543	1	-0.08	ExN.CA1.2	Megf8
0.000368964	0.170511	0.225	0.134	1	0.091	ExN.CA1.2	Ubtd1
0.000370902	-0.0220163	0.831	0.751	1	0.08	ExN.CA1.2	Rapgef6
0.000371025	0.221881	0.129	0.071	1	0.058	ExN.CA1.2	Gm6999
0.000373207	0.14361	0.291	0.187	1	0.104	ExN.CA1.2	Zfp169
0.000373701	-0.203015	0.312	0.401	1	-0.089	ExN.CA1.2	Supt6
0.000374405	0.053358	0.813	0.715	1	0.098	ExN.CA1.2	Tmem117
0.000378879	0.23611	0.447	0.35	1	0.097	ExN.CA1.2	Lamc1
0.00038706	0.2216	0.715	0.615	1	0.1	ExN.CA1.2	Orc4
0.000389934	-0.145066	0.258	0.303	1	-0.045	ExN.CA1.2	Arhgef1
0.000390714	0.00875089	0.975	0.924	1	0.051	ExN.CA1.2	Ntrk2
0.000392428	-0.188259	0.334	0.416	1	-0.082	ExN.CA1.2	Abca2
0.000393203	0.171933	0.712	0.597	1	0.115	ExN.CA1.2	Rngtt
0.000398215	-0.166106	0.787	0.759	1	0.028	ExN.CA1.2	Abr
0.000398611	-0.0233464	0.863	0.786	1	0.077	ExN.CA1.2	Srgap2
0.000402691	0.247072	0.501	0.401	1	0.1	ExN.CA1.2	1700087I21Rik
0.00040763	0.133693	0.466	0.35	1	0.116	ExN.CA1.2	Lnpk
0.000411005	0.0740565	0.354	0.263	1	0.091	ExN.CA1.2	Gm43175
0.00041793	-0.161086	0.25	0.307	1	-0.057	ExN.CA1.2	Usp4
0.000419274	-0.193552	0.291	0.379	1	-0.088	ExN.CA1.2	Gnl3l
0.000419448	-0.11105	0.06	0.125	1	-0.065	ExN.CA1.2	Tmem179
0.000424018	-0.0270505	0.872	0.802	1	0.07	ExN.CA1.2	Luc7l2
0.000424851	0.543363	0.803	0.739	1	0.064	ExN.CA1.2	Zbtb20
0.000425212	0.06903	0.575	0.47	1	0.105	ExN.CA1.2	Hnrnpc
0.000425244	-0.155633	0.282	0.327	1	-0.045	ExN.CA1.2	Srpk1
0.000425645	-0.136043	0.112	0.198	1	-0.086	ExN.CA1.2	Cog2
0.000427424	0.240672	0.493	0.383	1	0.11	ExN.CA1.2	E230016M11Rik
0.000428629	-0.215178	0.811	0.804	1	0.007	ExN.CA1.2	Cracdl
0.000429304	0.264768	0.263	0.174	1	0.089	ExN.CA1.2	Cacng2
0.000429522	0.0913157	0.969	0.913	1	0.056	ExN.CA1.2	Gucy1a2
0.000431382	0.207124	0.346	0.236	1	0.11	ExN.CA1.2	Ubash3b
0.000433341	-0.189538	0.584	0.588	1	-0.004	ExN.CA1.2	Ski
0.00043753	-0.132244	0.104	0.185	1	-0.081	ExN.CA1.2	Stk25
0.000437704	-0.170193	0.236	0.318	1	-0.082	ExN.CA1.2	Luc7l
0.000438069	0.212538	1	0.998	1	0.002	ExN.CA1.2	Snhg11
0.00043875	-0.15587	0.178	0.269	1	-0.091	ExN.CA1.2	Tardbp
0.000439984	0.108169	0.187	0.105	1	0.082	ExN.CA1.2	Ercc5
0.000445098	-0.173348	0.252	0.343	1	-0.091	ExN.CA1.2	Strn4
0.000445929	0.319911	0.89	0.833	1	0.057	ExN.CA1.2	Nkain3
0.000446984	-0.129168	0.085	0.16	1	-0.075	ExN.CA1.2	Smarcd1
0.000448182	-0.203778	0.361	0.434	1	-0.073	ExN.CA1.2	Nlgn2
0.00044893	-0.106922	0.058	0.125	1	-0.067	ExN.CA1.2	Mtch1
0.00044964	0.154355	0.523	0.403	1	0.12	ExN.CA1.2	Snx30
0.000450102	0.0364088	0.865	0.78	1	0.085	ExN.CA1.2	Smg6
0.000452116	-0.17154	0.233	0.321	1	-0.088	ExN.CA1.2	Atp6v0a2
0.000453593	0.169455	0.743	0.633	1	0.11	ExN.CA1.2	Nedd4
0.000458572	-0.149448	0.833	0.804	1	0.029	ExN.CA1.2	Stxbp1
0.000461962	0.108118	0.117	0.053	1	0.064	ExN.CA1.2	Col6a6
0.000463367	-0.188598	0.376	0.423	1	-0.047	ExN.CA1.2	Esco1
0.000464248	0.155895	0.178	0.096	1	0.082	ExN.CA1.2	Dysf
0.00046635	-0.223663	0.397	0.468	1	-0.071	ExN.CA1.2	Trim46
0.00046639	0.183121	0.446	0.33	1	0.116	ExN.CA1.2	Cep128
0.000467057	0.136537	0.683	0.568	1	0.115	ExN.CA1.2	Stt3b
0.000467276	0.143727	0.924	0.851	1	0.073	ExN.CA1.2	Mtus2
0.000467585	-0.193861	0.392	0.443	1	-0.051	ExN.CA1.2	Srek1
0.000469023	-0.0805623	0.934	0.882	1	0.052	ExN.CA1.2	Nptn
0.0004705	0.17056	0.348	0.238	1	0.11	ExN.CA1.2	Cfap418
0.000470914	-0.161568	0.493	0.514	1	-0.021	ExN.CA1.2	Capzb
0.000471027	-0.124644	0.082	0.145	1	-0.063	ExN.CA1.2	Zfp335
0.000473201	-0.176365	0.225	0.327	1	-0.102	ExN.CA1.2	Gga3
0.00047525	0.195908	0.565	0.45	1	0.115	ExN.CA1.2	2610005L07Rik.1
0.000476133	0.0559074	0.165	0.102	1	0.063	ExN.CA1.2	Laptm4b
0.000478477	-0.132443	0.082	0.156	1	-0.074	ExN.CA1.2	Stx1a
0.000478932	-0.230976	0.704	0.715	1	-0.011	ExN.CA1.2	Ank1
0.000479749	-0.205487	0.408	0.49	1	-0.082	ExN.CA1.2	Cul9
0.000481887	0.12824	0.633	0.517	1	0.116	ExN.CA1.2	Acvr2a
0.000488448	-0.1209	0.076	0.145	1	-0.069	ExN.CA1.2	Atp13a1
0.000489337	0.262472	0.992	0.991	1	0.001	ExN.CA1.2	Gria1
0.000492716	-0.106505	0.047	0.105	1	-0.058	ExN.CA1.2	Actb
0.00049302	-0.141938	0.135	0.225	1	-0.09	ExN.CA1.2	Gm16008
0.00049507	-0.187451	0.323	0.43	1	-0.107	ExN.CA1.2	Rnf214
0.000496143	0.0883983	0.649	0.539	1	0.11	ExN.CA1.2	Zmym2
0.00049654	0.16709	0.468	0.35	1	0.118	ExN.CA1.2	Taf3
0.000497973	0.116761	0.124	0.062	1	0.062	ExN.CA1.2	Kctd9
0.000501585	0.177252	0.962	0.906	1	0.056	ExN.CA1.2	Pde4d
0.00051476	-0.127579	0.679	0.648	1	0.031	ExN.CA1.2	Ergic1
0.000522017	-0.141386	0.129	0.218	1	-0.089	ExN.CA1.2	Prkab2
0.000522937	0.0668498	0.11	0.051	1	0.059	ExN.CA1.2	Qrfprl
0.000524172	0.02486	0.647	0.555	1	0.092	ExN.CA1.2	Ube3c
0.000524505	0.31426	1	0.996	1	0.004	ExN.CA1.2	Tenm2
0.000524851	0.174189	0.717	0.604	1	0.113	ExN.CA1.2	Fam13c
0.000526415	0.182438	0.291	0.192	1	0.099	ExN.CA1.2	Ptbp3
0.000526574	0.219653	0.702	0.608	1	0.094	ExN.CA1.2	Bltp1
0.000527712	0.215204	0.813	0.717	1	0.096	ExN.CA1.2	Runx1t1
0.000527873	0.106027	0.117	0.056	1	0.061	ExN.CA1.2	Gm38256
0.000533219	-0.164351	0.195	0.287	1	-0.092	ExN.CA1.2	Bltp2
0.000533635	0.0182226	0.605	0.517	1	0.088	ExN.CA1.2	Tbcd
0.000535121	0.226635	0.306	0.209	1	0.097	ExN.CA1.2	Pard3b
0.000535527	0.219184	1	0.996	1	0.004	ExN.CA1.2	Phactr1
0.00053579	0.073979	0.89	0.806	1	0.084	ExN.CA1.2	Actr3b
0.000536117	-0.119671	0.093	0.169	1	-0.076	ExN.CA1.2	Atp13a2
0.000536738	-0.166506	0.183	0.272	1	-0.089	ExN.CA1.2	Ddx5
0.000537963	0.16849	0.219	0.129	1	0.09	ExN.CA1.2	Ube2cbp
0.000543322	0.189723	0.247	0.156	1	0.091	ExN.CA1.2	Arhgap22
0.000543334	0.202693	0.732	0.626	1	0.106	ExN.CA1.2	Fgd4
0.000543663	-0.135391	0.082	0.14	1	-0.058	ExN.CA1.2	Slc6a8
0.000544255	-0.30085	0.49	0.53	1	-0.04	ExN.CA1.2	Chst11
0.000546534	0.53798	0.463	0.403	1	0.06	ExN.CA1.2	Grik4
0.000550688	0.158255	0.175	0.098	1	0.077	ExN.CA1.2	Fads2
0.000551338	-0.105882	0.074	0.122	1	-0.048	ExN.CA1.2	Tafazzin
0.000557099	-0.0827751	0.964	0.922	1	0.042	ExN.CA1.2	Macf1
0.000564504	-0.19402	0.652	0.664	1	-0.012	ExN.CA1.2	Smarca4
0.0005702	-0.0764921	0.06	0.122	1	-0.062	ExN.CA1.2	Ube2j2
0.000571433	-0.114623	0.08	0.154	1	-0.074	ExN.CA1.2	Mlf2
0.000573049	0.164756	1	0.987	1	0.013	ExN.CA1.2	Dpp6
0.000579226	0.203536	0.591	0.479	1	0.112	ExN.CA1.2	Ddx10
0.000579289	-0.148436	0.153	0.227	1	-0.074	ExN.CA1.2	Actr1a
0.000580208	0.106422	0.269	0.176	1	0.093	ExN.CA1.2	Cir1
0.000584176	0.144183	0.754	0.646	1	0.108	ExN.CA1.2	Mtmr3
0.000584951	0.21783	0.535	0.428	1	0.107	ExN.CA1.2	Nfkb1
0.000587476	0.290342	0.561	0.452	1	0.109	ExN.CA1.2	Zfp804a
0.000591784	-0.176839	0.753	0.742	1	0.011	ExN.CA1.2	Epb41l1
0.000591855	0.206178	0.647	0.539	1	0.108	ExN.CA1.2	Cep170
0.000595435	-0.120355	0.288	0.307	1	-0.019	ExN.CA1.2	Calm2
0.000597226	-0.190904	0.488	0.543	1	-0.055	ExN.CA1.2	Srrm1
0.000600021	0.11584	0.83	0.733	1	0.097	ExN.CA1.2	Cstpp1
0.000600694	-0.175235	0.25	0.359	1	-0.109	ExN.CA1.2	Hnrnpll
0.000604253	0.0659694	0.707	0.604	1	0.103	ExN.CA1.2	Mir124-2hg
0.000608399	-0.122971	0.094	0.165	1	-0.071	ExN.CA1.2	Inpp5j
0.000612908	-0.205207	0.42	0.506	1	-0.086	ExN.CA1.2	Ewsr1
0.000613615	0.0882804	0.712	0.606	1	0.106	ExN.CA1.2	Armh3
0.000616672	0.193	0.833	0.744	1	0.089	ExN.CA1.2	Wdr33
0.000621576	0.0936071	0.23	0.147	1	0.083	ExN.CA1.2	Cfap61
0.000626261	0.0959688	0.12	0.053	1	0.067	ExN.CA1.2	Tbc1d4
0.000627106	-0.233042	0.477	0.552	1	-0.075	ExN.CA1.2	Bicra
0.000629041	0.101064	0.117	0.053	1	0.064	ExN.CA1.2	Gm12610
0.000629613	0.118043	0.129	0.06	1	0.069	ExN.CA1.2	Rab27a
0.000633524	0.150277	0.31	0.207	1	0.103	ExN.CA1.2	Sugct
0.00063398	0.202094	0.394	0.285	1	0.109	ExN.CA1.2	Hsd17b12
0.000635518	0.00785632	0.706	0.601	1	0.105	ExN.CA1.2	Etl4
0.00063565	0.0491378	0.894	0.815	1	0.079	ExN.CA1.2	Sptbn1
0.000638982	0.193864	0.956	0.909	1	0.047	ExN.CA1.2	Ptk2
0.000640335	0.131006	0.235	0.143	1	0.092	ExN.CA1.2	Slco4c1
0.000640469	0.175708	0.704	0.592	1	0.112	ExN.CA1.2	Atf6
0.000642341	0.028207	0.808	0.719	1	0.089	ExN.CA1.2	Phf21a
0.000645497	-0.117348	0.079	0.151	1	-0.072	ExN.CA1.2	Ints7
0.00064877	0.156911	0.688	0.575	1	0.113	ExN.CA1.2	Serpini1
0.000648777	0.214982	0.441	0.336	1	0.105	ExN.CA1.2	Patj
0.000673424	0.197057	0.687	0.577	1	0.11	ExN.CA1.2	Ptpn4
0.000675052	0.185725	0.638	0.523	1	0.115	ExN.CA1.2	Map4k4
0.000677283	0.183678	0.671	0.559	1	0.112	ExN.CA1.2	Ipo11
0.000682177	0.167751	0.324	0.223	1	0.101	ExN.CA1.2	Exoc3
0.000682309	-0.149544	0.175	0.256	1	-0.081	ExN.CA1.2	Snx32
0.000692083	0.208304	0.605	0.494	1	0.111	ExN.CA1.2	Mindy3
0.000696246	0.206228	0.71	0.612	1	0.098	ExN.CA1.2	Usp15
0.00069646	0.216637	0.613	0.503	1	0.11	ExN.CA1.2	Epb41l4b
0.000707542	0.151011	0.186	0.105	1	0.081	ExN.CA1.2	Gm13629
0.000718059	0.0336751	0.22	0.163	1	0.057	ExN.CA1.2	Zfp74
0.000719456	-0.219803	0.135	0.22	1	-0.085	ExN.CA1.2	Kit
0.00072259	-0.176376	0.235	0.314	1	-0.079	ExN.CA1.2	Pianp
0.000723992	0.136137	0.712	0.601	1	0.111	ExN.CA1.2	Osbpl9
0.000728028	-0.125272	0.761	0.717	1	0.044	ExN.CA1.2	Unc13b
0.00072856	0.0310832	0.906	0.831	1	0.075	ExN.CA1.2	Rnf165
0.000728859	-0.0886149	0.046	0.105	1	-0.059	ExN.CA1.2	Cc2d1a
0.000732386	0.150284	0.973	0.929	1	0.044	ExN.CA1.2	Arid1b
0.000734149	-0.137471	0.156	0.223	1	-0.067	ExN.CA1.2	Nxf1
0.000734667	0.107048	0.828	0.733	1	0.095	ExN.CA1.2	Psme4
0.000734951	0.132502	0.195	0.118	1	0.077	ExN.CA1.2	Gm29865
0.000737102	-0.119769	0.143	0.185	1	-0.042	ExN.CA1.2	Ppp1r9b
0.000738409	0.209908	0.572	0.459	1	0.113	ExN.CA1.2	Stmn2
0.000755665	-0.154811	0.241	0.29	1	-0.049	ExN.CA1.2	Nckap5l
0.000757178	0.110012	0.112	0.053	1	0.059	ExN.CA1.2	A830052D11Rik
0.000758198	0.160753	0.494	0.379	1	0.115	ExN.CA1.2	Abhd18
0.00075839	-0.104875	0.083	0.158	1	-0.075	ExN.CA1.2	Khsrp
0.000760102	0.152036	0.543	0.428	1	0.115	ExN.CA1.2	Basp1
0.00076154	-0.118855	0.096	0.171	1	-0.075	ExN.CA1.2	Nckipsd
0.000762106	0.148283	0.142	0.08	1	0.062	ExN.CA1.2	Tll1
0.000762123	-0.103781	0.079	0.131	1	-0.052	ExN.CA1.2	Mest
0.000763146	-0.205718	0.441	0.539	1	-0.098	ExN.CA1.2	Ubr2
0.000765565	-0.119363	0.131	0.218	1	-0.087	ExN.CA1.2	Usp2
0.000765984	-0.0372013	0.772	0.699	1	0.073	ExN.CA1.2	Arhgap32
0.000770034	0.181089	0.403	0.294	1	0.109	ExN.CA1.2	Xiap
0.000771878	0.177218	0.376	0.267	1	0.109	ExN.CA1.2	Gm11906
0.000778832	-0.202755	0.502	0.608	1	-0.106	ExN.CA1.2	Arhgap23
0.000782939	0.209023	0.605	0.494	1	0.111	ExN.CA1.2	Ddhd1
0.000786998	0.139297	0.838	0.744	1	0.094	ExN.CA1.2	E130307A14Rik
0.000787128	-0.216702	0.528	0.595	1	-0.067	ExN.CA1.2	Dnajc13
0.000787855	-0.106377	0.052	0.105	1	-0.053	ExN.CA1.2	Rexo1
0.000792162	-0.149876	0.165	0.252	1	-0.087	ExN.CA1.2	Fam131a
0.000792547	0.130672	0.29	0.192	1	0.098	ExN.CA1.2	4921504A21Rik
0.000795421	0.11259	0.134	0.069	1	0.065	ExN.CA1.2	Hmgcs1
0.000800273	0.165169	0.156	0.102	1	0.054	ExN.CA1.2	Vwc2
0.000816789	-0.0949582	0.06	0.118	1	-0.058	ExN.CA1.2	Tmem25
0.000817585	0.151332	0.276	0.178	1	0.098	ExN.CA1.2	Prxl2c
0.000819971	0.207983	0.669	0.561	1	0.108	ExN.CA1.2	Lyst
0.000820624	0.182163	0.704	0.595	1	0.109	ExN.CA1.2	Fam110b
0.000821299	-0.114671	0.636	0.606	1	0.03	ExN.CA1.2	Pdzd4
0.000822987	-0.12113	0.117	0.2	1	-0.083	ExN.CA1.2	Cdk16
0.000823055	0.161341	0.317	0.216	1	0.101	ExN.CA1.2	Ankmy2
0.00082506	-0.188391	0.413	0.494	1	-0.081	ExN.CA1.2	Ipo9
0.000829528	0.134146	0.189	0.107	1	0.082	ExN.CA1.2	Cep97
0.000831271	0.104658	0.131	0.062	1	0.069	ExN.CA1.2	A430010J10Rik
0.000834442	-0.122145	0.094	0.136	1	-0.042	ExN.CA1.2	Nr1d1
0.000842428	-0.123072	0.159	0.214	1	-0.055	ExN.CA1.2	Akap8
0.000842971	-0.1095	0.709	0.666	1	0.043	ExN.CA1.2	Ppp2r5c
0.000846647	0.172255	0.78	0.679	1	0.101	ExN.CA1.2	Ttll5
0.000849188	0.184863	0.556	0.443	1	0.113	ExN.CA1.2	Rab2a
0.000849365	0.2044	0.372	0.269	1	0.103	ExN.CA1.2	Wdr25
0.000850709	0.162924	0.57	0.454	1	0.116	ExN.CA1.2	Micu3
0.000853473	0.237762	0.359	0.254	1	0.105	ExN.CA1.2	Ttc28
0.0008537	0.18755	0.376	0.269	1	0.107	ExN.CA1.2	Gm40841
0.000854668	-0.126863	0.09	0.163	1	-0.073	ExN.CA1.2	Zdhhc8
0.000858349	-0.00768516	0.846	0.771	1	0.075	ExN.CA1.2	Fam193a
0.000860255	0.0878807	0.126	0.062	1	0.064	ExN.CA1.2	Smim4
0.000863327	-0.389447	0.422	0.486	1	-0.064	ExN.CA1.2	Lars2
0.000870989	-0.145758	0.148	0.225	1	-0.077	ExN.CA1.2	Cep104
0.000876289	0.143815	0.504	0.39	1	0.114	ExN.CA1.2	Itm2b
0.000879385	0.142366	0.272	0.176	1	0.096	ExN.CA1.2	Aco1
0.00088195	0.147402	0.646	0.532	1	0.114	ExN.CA1.2	Ocrl
0.000883254	-0.189458	0.35	0.421	1	-0.071	ExN.CA1.2	Usp7
0.000888754	-0.170096	0.214	0.307	1	-0.093	ExN.CA1.2	Muc3a
0.000889183	-0.195738	0.436	0.503	1	-0.067	ExN.CA1.2	Mapk8ip3
0.000890085	0.301638	0.521	0.428	1	0.093	ExN.CA1.2	Gm6260
0.00089067	0.135856	0.23	0.14	1	0.09	ExN.CA1.2	Mn1
0.000891268	0.116125	0.586	0.474	1	0.112	ExN.CA1.2	Plekhm3
0.000891309	0.147631	0.729	0.621	1	0.108	ExN.CA1.2	Sestd1
0.000899831	-0.150911	0.291	0.334	1	-0.043	ExN.CA1.2	Fubp3
0.000900044	-0.0857223	0.046	0.105	1	-0.059	ExN.CA1.2	Atg12
0.000904605	0.133996	0.909	0.833	1	0.076	ExN.CA1.2	Rasal2
0.000904922	0.141182	0.696	0.586	1	0.11	ExN.CA1.2	Tbc1d19
0.000907903	0.130991	0.287	0.189	1	0.098	ExN.CA1.2	Atl3
0.000914016	0.0114755	0.934	0.871	1	0.063	ExN.CA1.2	Phf24
0.000916911	0.144365	0.542	0.428	1	0.114	ExN.CA1.2	Baalc
0.000918931	0.190953	0.531	0.419	1	0.112	ExN.CA1.2	Nsun7
0.000919316	0.164467	0.712	0.604	1	0.108	ExN.CA1.2	Tnks
0.000925614	0.118545	0.754	0.65	1	0.104	ExN.CA1.2	Agtpbp1
0.000931586	0.149599	0.872	0.788	1	0.084	ExN.CA1.2	Tmcc1
0.000937953	0.213282	0.723	0.628	1	0.095	ExN.CA1.2	Supt3
0.00094442	-0.103328	0.063	0.125	1	-0.062	ExN.CA1.2	Dgkq
0.000951054	0.0723461	0.934	0.866	1	0.068	ExN.CA1.2	Cdc42bpa
0.000959844	0.0834011	0.753	0.653	1	0.1	ExN.CA1.2	Uty
0.000962721	0.13558	0.205	0.122	1	0.083	ExN.CA1.2	Unc13c
0.000973484	0.0607145	0.728	0.63	1	0.098	ExN.CA1.2	Zfp638
0.000974154	0.349217	0.539	0.428	1	0.111	ExN.CA1.2	Prr16
0.000975525	-0.185452	0.825	0.813	1	0.012	ExN.CA1.2	Cacng8
0.000984715	0.0809466	0.765	0.666	1	0.099	ExN.CA1.2	Chl1
0.000985403	-0.146204	0.192	0.29	1	-0.098	ExN.CA1.2	Osbp
0.000986364	0.0412402	0.88	0.802	1	0.078	ExN.CA1.2	Clasp2
0.000987148	-0.132218	0.88	0.844	1	0.036	ExN.CA1.2	Bsn
0.000997667	0.112768	0.846	0.755	1	0.091	ExN.CA1.2	Tmem150c
0.00100188	-0.19141	0.337	0.428	1	-0.091	ExN.CA1.2	Eftud2
0.00100348	0.230132	0.413	0.303	1	0.11	ExN.CA1.2	Gm44593
0.00100739	-0.124587	0.099	0.174	1	-0.075	ExN.CA1.2	Nsmf
0.00101004	-0.0700821	0.617	0.57	1	0.047	ExN.CA1.2	Rbm26
0.00101331	-0.12153	0.135	0.187	1	-0.052	ExN.CA1.2	Nomo1
0.00101923	0.132886	0.869	0.784	1	0.085	ExN.CA1.2	Usp34
0.00101941	0.165575	0.62	0.508	1	0.112	ExN.CA1.2	Tent2
0.00102659	0.229953	0.972	0.931	1	0.041	ExN.CA1.2	Galnt17
0.00102791	-0.167142	0.216	0.314	1	-0.098	ExN.CA1.2	Camk1g
0.00103023	-0.122759	0.096	0.165	1	-0.069	ExN.CA1.2	Tada1
0.00103116	-0.169793	0.236	0.305	1	-0.069	ExN.CA1.2	Mecr
0.00103352	0.134282	0.161	0.087	1	0.074	ExN.CA1.2	Nalf2
0.00103841	-0.171987	0.285	0.347	1	-0.062	ExN.CA1.2	Ipo13
0.00104962	0.121594	0.157	0.087	1	0.07	ExN.CA1.2	4930500H12Rik
0.00105826	-0.105633	0.627	0.577	1	0.05	ExN.CA1.2	Ajap1
0.00105932	0.105539	0.838	0.746	1	0.092	ExN.CA1.2	Trak1
0.00106087	0.200596	0.255	0.174	1	0.081	ExN.CA1.2	Lrriq1
0.00106129	-0.0926081	0.962	0.924	1	0.038	ExN.CA1.2	Dock9
0.00106171	0.278927	0.973	0.935	1	0.038	ExN.CA1.2	Dpp10
0.00106604	0.159666	0.898	0.822	1	0.076	ExN.CA1.2	Osbpl10
0.00106662	0.137602	0.121	0.058	1	0.063	ExN.CA1.2	Gm31615
0.00107557	-0.444779	0.243	0.327	1	-0.084	ExN.CA1.2	Htr2c
0.00107984	0.1932	0.833	0.742	1	0.091	ExN.CA1.2	Sorcs1
0.0010956	0.258221	0.967	0.969	1	-0.002	ExN.CA1.2	Gabrg3
0.00109675	-0.164877	0.964	0.94	1	0.024	ExN.CA1.2	Sipa1l1
0.00109693	-0.179609	0.361	0.403	1	-0.042	ExN.CA1.2	Ppfia3
0.00109701	0.0884661	0.178	0.107	1	0.071	ExN.CA1.2	Rassf8
0.00110137	-0.133758	0.614	0.595	1	0.019	ExN.CA1.2	Atp2c1
0.00110882	0.0937762	0.501	0.396	1	0.105	ExN.CA1.2	Kcmf1
0.00110956	0.145642	0.764	0.661	1	0.103	ExN.CA1.2	Parm1
0.0011124	0.141723	0.742	0.637	1	0.105	ExN.CA1.2	Ppp2r5e
0.00111826	0.0700756	0.827	0.737	1	0.09	ExN.CA1.2	Eml1
0.001121	-0.0265164	0.507	0.443	1	0.064	ExN.CA1.2	Asph
0.00112906	0.206074	0.287	0.234	1	0.053	ExN.CA1.2	Kcnk1
0.00113504	0.128703	0.104	0.047	1	0.057	ExN.CA1.2	Gm20663
0.00113982	-0.139125	0.291	0.334	1	-0.043	ExN.CA1.2	Metap2
0.00114137	-0.148166	0.25	0.354	1	-0.104	ExN.CA1.2	Supt20
0.00114243	0.137584	0.209	0.125	1	0.084	ExN.CA1.2	Dclk3
0.00114317	0.144363	0.488	0.376	1	0.112	ExN.CA1.2	Hipk3
0.00114555	-0.12253	0.121	0.2	1	-0.079	ExN.CA1.2	Pcnx3
0.00114566	0.115375	0.181	0.102	1	0.079	ExN.CA1.2	Ccdc7a
0.00114625	0.105444	0.994	0.964	1	0.03	ExN.CA1.2	Arpp21
0.00114709	-0.152244	0.4	0.419	1	-0.019	ExN.CA1.2	Tia1
0.00115015	-0.196373	0.38	0.457	1	-0.077	ExN.CA1.2	Pcdh1
0.00115738	0.13858	0.208	0.138	1	0.07	ExN.CA1.2	Erg28
0.00117219	0.176449	0.781	0.684	1	0.097	ExN.CA1.2	Fmnl2
0.00119074	0.0723714	0.772	0.675	1	0.097	ExN.CA1.2	Jarid2
0.00119209	-0.174009	0.287	0.37	1	-0.083	ExN.CA1.2	Cramp1
0.00119388	0.155158	0.683	0.575	1	0.108	ExN.CA1.2	Rps6kc1
0.00119562	0.197629	0.482	0.381	1	0.101	ExN.CA1.2	Ttc21b
0.00120031	0.109506	0.824	0.731	1	0.093	ExN.CA1.2	Apex2
0.00120291	0.104684	0.964	0.911	1	0.053	ExN.CA1.2	Trim9
0.0012069	-0.139866	0.159	0.249	1	-0.09	ExN.CA1.2	Pxn
0.00122219	0.0230023	0.932	0.869	1	0.063	ExN.CA1.2	Adcy9
0.00122506	0.167682	0.88	0.802	1	0.078	ExN.CA1.2	Ldlrad4
0.00122631	-0.129484	0.767	0.733	1	0.034	ExN.CA1.2	Fnbp1
0.00123905	-0.0843035	0.069	0.134	1	-0.065	ExN.CA1.2	Swi5
0.00124455	0.0808402	0.102	0.045	1	0.057	ExN.CA1.2	Abca13
0.00124683	-0.164826	0.077	0.14	1	-0.063	ExN.CA1.2	Gm30003
0.00125237	-0.195876	0.534	0.581	1	-0.047	ExN.CA1.2	Cpsf6
0.00126147	0.214417	0.361	0.263	1	0.098	ExN.CA1.2	A930017M01Rik
0.00126637	0.153064	0.181	0.114	1	0.067	ExN.CA1.2	Vmn2r84
0.00126778	0.0988022	0.529	0.423	1	0.106	ExN.CA1.2	Parn
0.00127121	0.160257	0.455	0.345	1	0.11	ExN.CA1.2	Nipa1
0.0012736	-0.110389	0.504	0.481	1	0.023	ExN.CA1.2	Pik3c2b
0.00127836	0.182701	0.452	0.345	1	0.107	ExN.CA1.2	Tnfrsf21
0.0012786	0.170343	0.238	0.158	1	0.08	ExN.CA1.2	Wdr27
0.00128029	0.217383	0.501	0.41	1	0.091	ExN.CA1.2	Lims1
0.00129158	0.134701	0.866	0.782	1	0.084	ExN.CA1.2	Scn1a
0.00129425	-0.182629	0.346	0.441	1	-0.095	ExN.CA1.2	Rab40c
0.00129857	-0.0477566	0.863	0.802	1	0.061	ExN.CA1.2	Nf1
0.00130124	-0.0726199	0.098	0.12	1	-0.022	ExN.CA1.2	Dact3
0.0013023	-0.175345	0.318	0.396	1	-0.078	ExN.CA1.2	Hp1bp3
0.00130715	-0.125348	0.107	0.185	1	-0.078	ExN.CA1.2	Gaa
0.00130777	0.132688	0.18	0.105	1	0.075	ExN.CA1.2	Gm46218
0.00132297	-0.147509	0.217	0.294	1	-0.077	ExN.CA1.2	Git2
0.00132426	0.148224	0.712	0.606	1	0.106	ExN.CA1.2	Snx10
0.00133521	0.155395	0.557	0.445	1	0.112	ExN.CA1.2	Epc1
0.00134331	-0.13224	0.047	0.1	1	-0.053	ExN.CA1.2	Gm15564
0.0013609	-0.195819	0.427	0.508	1	-0.081	ExN.CA1.2	Fbxo41
0.00138418	-0.113018	0.093	0.138	1	-0.045	ExN.CA1.2	Clk2
0.0013857	0.171429	0.803	0.71	1	0.093	ExN.CA1.2	Slc44a1
0.00140456	-0.194073	0.715	0.726	1	-0.011	ExN.CA1.2	Mprip
0.00141069	0.156939	0.235	0.154	1	0.081	ExN.CA1.2	Hs3st1
0.00141084	0.102843	0.128	0.065	1	0.063	ExN.CA1.2	2610206C17Rik
0.00141206	0.140048	0.554	0.443	1	0.111	ExN.CA1.2	Fgfr2
0.00141281	0.177308	0.825	0.739	1	0.086	ExN.CA1.2	Mvb12b
0.00141533	0.205265	0.529	0.443	1	0.086	ExN.CA1.2	Snx2
0.00141552	0.15308	0.707	0.601	1	0.106	ExN.CA1.2	Arhgap20
0.00141756	-0.0415356	0.479	0.419	1	0.06	ExN.CA1.2	Wdfy2
0.00141972	-0.110454	0.085	0.143	1	-0.058	ExN.CA1.2	Srsf2
0.00142444	0.132049	0.192	0.14	1	0.052	ExN.CA1.2	Abcc4
0.0014263	0.137709	0.622	0.512	1	0.11	ExN.CA1.2	Tbl1x
0.00142689	0.10791	0.847	0.759	1	0.088	ExN.CA1.2	Ankrd17
0.00143024	-0.00769792	0.724	0.644	1	0.08	ExN.CA1.2	Ephb2
0.00143433	-0.180619	0.565	0.606	1	-0.041	ExN.CA1.2	Qrich1
0.00143542	0.0928483	0.117	0.056	1	0.061	ExN.CA1.2	4933427D06Rik
0.001438	-0.119363	0.137	0.183	1	-0.046	ExN.CA1.2	Fbxl19
0.00144147	0.171111	0.679	0.572	1	0.107	ExN.CA1.2	Acbd6
0.00144446	-0.172695	0.279	0.359	1	-0.08	ExN.CA1.2	Rnf41
0.00146107	-0.175345	0.318	0.405	1	-0.087	ExN.CA1.2	Jph4
0.00146421	-0.133259	0.189	0.283	1	-0.094	ExN.CA1.2	Mark4
0.0014697	-0.037688	0.902	0.844	1	0.058	ExN.CA1.2	Tnrc6b
0.00150895	0.222583	0.517	0.412	1	0.105	ExN.CA1.2	Clybl
0.00151457	0.0611867	0.271	0.196	1	0.075	ExN.CA1.2	Pop1
0.00151891	-0.0641123	0.932	0.884	1	0.048	ExN.CA1.2	Tcf20
0.00153589	-0.135469	0.117	0.189	1	-0.072	ExN.CA1.2	Grk2
0.00153923	0.184565	0.672	0.566	1	0.106	ExN.CA1.2	Cobl
0.00153976	0.0378531	0.487	0.403	1	0.084	ExN.CA1.2	Camk2g
0.00154234	0.217884	0.554	0.465	1	0.089	ExN.CA1.2	Sgsm1
0.00154694	0.112477	0.115	0.053	1	0.062	ExN.CA1.2	Foxo1
0.001552	-0.216543	0.603	0.688	1	-0.085	ExN.CA1.2	Atp1b1
0.0015554	-0.134724	0.159	0.232	1	-0.073	ExN.CA1.2	Sv2a
0.00156799	-0.0633237	0.369	0.343	1	0.026	ExN.CA1.2	Cds2
0.00157068	-0.11334	0.079	0.143	1	-0.064	ExN.CA1.2	Usp19
0.00157211	-0.0804049	0.961	0.92	1	0.041	ExN.CA1.2	Chst8
0.00157304	0.166957	0.817	0.728	1	0.089	ExN.CA1.2	Ehbp1
0.00157762	0.117409	0.871	0.788	1	0.083	ExN.CA1.2	Camkmt
0.00158519	-0.140393	0.184	0.241	1	-0.057	ExN.CA1.2	Smpd4
0.00158645	-0.151034	0.776	0.757	1	0.019	ExN.CA1.2	Mark3
0.00159728	0.199673	0.329	0.243	1	0.086	ExN.CA1.2	Fdft1
0.00159948	0.155805	0.265	0.194	1	0.071	ExN.CA1.2	Dnajc3
0.00160552	0.151854	0.488	0.379	1	0.109	ExN.CA1.2	Nr1d2
0.00161688	0.212498	0.529	0.428	1	0.101	ExN.CA1.2	Bbs9
0.00161951	0.171859	0.765	0.668	1	0.097	ExN.CA1.2	Fam78b
0.00162223	0.180341	0.361	0.263	1	0.098	ExN.CA1.2	Pip4p2
0.00162453	0.193358	0.353	0.256	1	0.097	ExN.CA1.2	Cdyl
0.00162639	0.0598129	0.115	0.062	1	0.053	ExN.CA1.2	Unc5cl
0.00163076	0.17728	0.482	0.376	1	0.106	ExN.CA1.2	Mrpl1
0.00163191	-0.142669	0.15	0.229	1	-0.079	ExN.CA1.2	Atxn7l2
0.00164754	-0.161239	0.222	0.296	1	-0.074	ExN.CA1.2	Ddx6
0.00165277	-0.123274	0.139	0.223	1	-0.084	ExN.CA1.2	Caly
0.00165816	-0.223201	0.402	0.51	1	-0.108	ExN.CA1.2	Stum
0.00166983	0.154858	0.272	0.183	1	0.089	ExN.CA1.2	Sec14l2
0.00167015	0.131586	0.581	0.472	1	0.109	ExN.CA1.2	Mpdz
0.00167287	-0.189593	0.441	0.508	1	-0.067	ExN.CA1.2	Smarcc2
0.001673	0.14304	0.573	0.463	1	0.11	ExN.CA1.2	8030462N17Rik
0.0016785	0.144751	0.494	0.385	1	0.109	ExN.CA1.2	Stx7
0.00168206	-0.0948997	0.063	0.125	1	-0.062	ExN.CA1.2	Sbds
0.00168273	-0.148569	0.189	0.267	1	-0.078	ExN.CA1.2	Rbck1
0.0016856	0.134548	0.298	0.203	1	0.095	ExN.CA1.2	Ccdc50
0.00169039	0.151828	0.353	0.252	1	0.101	ExN.CA1.2	Slc20a2
0.00169613	-0.0759803	0.093	0.129	1	-0.036	ExN.CA1.2	Ppp1r10
0.00171302	0.141064	0.506	0.396	1	0.11	ExN.CA1.2	Erp44
0.00173653	0.117206	0.228	0.145	1	0.083	ExN.CA1.2	Gm34237
0.00173757	0.15354	0.789	0.695	1	0.094	ExN.CA1.2	Ccdc88a
0.00173822	0.150544	0.376	0.274	1	0.102	ExN.CA1.2	Tmem170b
0.00173883	0.212733	0.583	0.488	1	0.095	ExN.CA1.2	Map3k13
0.00174069	-0.135828	0.161	0.207	1	-0.046	ExN.CA1.2	Setd1b
0.00175872	-0.115549	0.094	0.158	1	-0.064	ExN.CA1.2	Ina
0.00176566	-0.137891	0.38	0.401	1	-0.021	ExN.CA1.2	Naca
0.00176723	0.1096	0.131	0.067	1	0.064	ExN.CA1.2	Cpa6
0.00177396	0.133073	0.249	0.16	1	0.089	ExN.CA1.2	Itgb3bp
0.00177458	0.145317	0.967	0.92	1	0.047	ExN.CA1.2	Cntn3
0.00177697	0.1861	0.77	0.679	1	0.091	ExN.CA1.2	Abi1
0.00178214	-0.180399	0.63	0.659	1	-0.029	ExN.CA1.2	Crtc1
0.00178331	-0.0962748	0.068	0.125	1	-0.057	ExN.CA1.2	Edc4
0.00179506	-0.173668	0.294	0.372	1	-0.078	ExN.CA1.2	Deaf1
0.00180241	0.150484	0.548	0.439	1	0.109	ExN.CA1.2	Agk
0.00181338	-0.117244	0.101	0.174	1	-0.073	ExN.CA1.2	Rae1
0.00181459	0.167133	0.753	0.655	1	0.098	ExN.CA1.2	Ccny
0.00182485	0.162377	0.658	0.552	1	0.106	ExN.CA1.2	Tspan13
0.0018263	0.173583	0.506	0.401	1	0.105	ExN.CA1.2	Sarnp
0.0018349	0.137801	0.157	0.094	1	0.063	ExN.CA1.2	Gm15246
0.0018387	0.158307	0.345	0.245	1	0.1	ExN.CA1.2	Shld1
0.00185401	0.162446	0.654	0.548	1	0.106	ExN.CA1.2	Akap9
0.00185406	0.186323	0.55	0.443	1	0.107	ExN.CA1.2	Mras
0.00186183	0.151582	0.29	0.196	1	0.094	ExN.CA1.2	Pcyox1l
0.00186391	0.12655	0.658	0.552	1	0.106	ExN.CA1.2	Fnip1
0.0018649	-0.125646	0.088	0.143	1	-0.055	ExN.CA1.2	Gm22513
0.00187603	0.177839	0.643	0.539	1	0.104	ExN.CA1.2	Ola1
0.00188054	0.171842	0.452	0.345	1	0.107	ExN.CA1.2	Snx12
0.00189121	0.101148	0.157	0.087	1	0.07	ExN.CA1.2	Pwwp2b
0.00189313	-0.0850036	0.05	0.102	1	-0.052	ExN.CA1.2	Ssbp4
0.00189402	-0.112326	0.219	0.254	1	-0.035	ExN.CA1.2	Hspa4
0.00189483	0.15678	0.633	0.526	1	0.107	ExN.CA1.2	Pds5b
0.00190409	0.131136	0.186	0.109	1	0.077	ExN.CA1.2	Gm2415
0.00190452	-0.0769772	0.817	0.766	1	0.051	ExN.CA1.2	Igsf9b
0.00190837	-0.168995	0.277	0.365	1	-0.088	ExN.CA1.2	Map7d1
0.00190881	0.153227	0.598	0.49	1	0.108	ExN.CA1.2	Senp6
0.00191164	0.0796086	0.835	0.748	1	0.087	ExN.CA1.2	B230209E15Rik
0.00191789	0.0825707	0.825	0.737	1	0.088	ExN.CA1.2	Ptprj
0.00192017	0.0984316	0.157	0.087	1	0.07	ExN.CA1.2	Pacsin2
0.00192305	-0.0320921	0.46	0.41	1	0.05	ExN.CA1.2	Agfg1
0.00193409	-0.0893038	0.052	0.102	1	-0.05	ExN.CA1.2	Rmnd5b
0.00194533	-0.0678985	0.91	0.86	1	0.05	ExN.CA1.2	Trerf1
0.00195677	-0.16273	0.233	0.316	1	-0.083	ExN.CA1.2	Med23
0.00196187	-0.121329	0.117	0.176	1	-0.059	ExN.CA1.2	Calm1
0.00198688	-0.184874	0.348	0.416	1	-0.068	ExN.CA1.2	Thpo
0.00198692	0.210528	0.644	0.543	1	0.101	ExN.CA1.2	Plppr5
0.00198826	0.088991	0.106	0.049	1	0.057	ExN.CA1.2	Tex29
0.00198872	0.192777	0.162	0.098	1	0.064	ExN.CA1.2	Smoc2
0.00199216	-0.161044	0.461	0.503	1	-0.042	ExN.CA1.2	Sbno1
0.00201746	-0.113746	0.157	0.243	1	-0.086	ExN.CA1.2	Hnrnpk
0.00203791	0.139783	0.677	0.572	1	0.105	ExN.CA1.2	Uggt2
0.00204343	-0.168617	0.438	0.472	1	-0.034	ExN.CA1.2	Chd8
0.00205798	-0.12193	0.12	0.183	1	-0.063	ExN.CA1.2	Drg1
0.00205872	-0.0863969	0.072	0.136	1	-0.064	ExN.CA1.2	Plxnb2
0.00205964	0.136121	0.765	0.668	1	0.097	ExN.CA1.2	Strn3
0.00206068	-0.0896832	0.397	0.374	1	0.023	ExN.CA1.2	Kdm2b
0.00206225	0.12381	0.225	0.143	1	0.082	ExN.CA1.2	Poln
0.00207345	-0.098916	0.079	0.134	1	-0.055	ExN.CA1.2	Exosc10
0.00207358	0.110406	0.175	0.1	1	0.075	ExN.CA1.2	Tbc1d31
0.00207493	0.18865	0.339	0.243	1	0.096	ExN.CA1.2	Elavl2
0.00207883	0.160762	0.613	0.506	1	0.107	ExN.CA1.2	Ext2
0.00208555	-0.0690621	0.324	0.31	1	0.014	ExN.CA1.2	Usp37
0.00208658	0.19841	0.528	0.439	1	0.089	ExN.CA1.2	Mindy2
0.00209187	-0.114513	0.09	0.158	1	-0.068	ExN.CA1.2	Slc9a4
0.00209294	0.0628576	0.283	0.209	1	0.074	ExN.CA1.2	Foxo3
0.00209434	0.0992909	0.389	0.294	1	0.095	ExN.CA1.2	Zfp943
0.00209839	-0.107415	0.984	0.955	1	0.029	ExN.CA1.2	Sntg1
0.00209906	0.0743779	0.984	0.947	1	0.037	ExN.CA1.2	Ncam1
0.00210203	-0.182214	0.354	0.443	1	-0.089	ExN.CA1.2	Syt11
0.00211461	0.145528	0.334	0.236	1	0.098	ExN.CA1.2	Slc4a1ap
0.00211672	-0.0947847	0.066	0.129	1	-0.063	ExN.CA1.2	Mpi
0.00212272	0.257568	0.915	0.857	1	0.058	ExN.CA1.2	Sgcd
0.00212282	0.0302571	0.934	0.873	1	0.061	ExN.CA1.2	Enah
0.00214396	0.182804	0.436	0.359	1	0.077	ExN.CA1.2	Trmt11
0.00215794	0.19482	0.283	0.194	1	0.089	ExN.CA1.2	Pced1b
0.0021616	0.136147	0.123	0.087	1	0.036	ExN.CA1.2	Orai2
0.00216616	-0.146508	0.178	0.252	1	-0.074	ExN.CA1.2	Akt2
0.0021738	0.389934	0.756	0.675	1	0.081	ExN.CA1.2	Tafa1
0.00218154	0.171458	0.69	0.588	1	0.102	ExN.CA1.2	Fbxw7
0.00218169	-0.106175	0.093	0.16	1	-0.067	ExN.CA1.2	Dnmt1
0.00218486	-0.128072	0.112	0.187	1	-0.075	ExN.CA1.2	Tyro3
0.00219062	0.103461	0.723	0.624	1	0.099	ExN.CA1.2	Memo1
0.00219163	-0.126109	0.079	0.129	1	-0.05	ExN.CA1.2	Syt5
0.00219825	-0.159717	0.214	0.292	1	-0.078	ExN.CA1.2	Pkn1
0.00221107	-0.113167	0.137	0.218	1	-0.081	ExN.CA1.2	Sf3b3
0.00221385	0.125722	0.389	0.29	1	0.099	ExN.CA1.2	Socs6
0.00221687	-0.116802	0.096	0.156	1	-0.06	ExN.CA1.2	Dbnl
0.0022184	-0.12856	0.061	0.122	1	-0.061	ExN.CA1.2	Scn5a
0.00222354	-0.123156	0.101	0.151	1	-0.05	ExN.CA1.2	Ncdn
0.00224245	0.156004	0.214	0.138	1	0.076	ExN.CA1.2	Nhsl1
0.00224819	0.126622	0.798	0.706	1	0.092	ExN.CA1.2	Baz2b
0.0022522	-0.0960622	0.791	0.751	1	0.04	ExN.CA1.2	Atxn2
0.00225554	0.142246	0.446	0.341	1	0.105	ExN.CA1.2	Kif17
0.00226622	0.133713	0.543	0.437	1	0.106	ExN.CA1.2	Scn3a
0.00227569	0.163321	0.501	0.394	1	0.107	ExN.CA1.2	Kdm6a
0.0022776	0.155381	0.685	0.584	1	0.101	ExN.CA1.2	Rsf1
0.00227828	0.121671	0.392	0.292	1	0.1	ExN.CA1.2	Slain2
0.00227934	-0.00607677	0.773	0.699	1	0.074	ExN.CA1.2	Trip12
0.00229217	0.232621	0.724	0.635	1	0.089	ExN.CA1.2	5330434G04Rik
0.00229782	-0.14368	0.2	0.29	1	-0.09	ExN.CA1.2	Zfp384
0.00230294	-0.0941547	0.058	0.118	1	-0.06	ExN.CA1.2	Rrnad1
0.00230733	-0.197669	0.529	0.572	1	-0.043	ExN.CA1.2	Ptpn5
0.00234288	0.158084	0.765	0.67	1	0.095	ExN.CA1.2	Arhgef9
0.00236014	-0.0863426	0.098	0.165	1	-0.067	ExN.CA1.2	Samd14
0.00237257	0.0712182	0.517	0.423	1	0.094	ExN.CA1.2	Csnk1g3
0.00239191	0.075946	0.975	0.931	1	0.044	ExN.CA1.2	Sik3
0.00239462	-0.0878853	0.483	0.45	1	0.033	ExN.CA1.2	Phip
0.00241032	-0.122715	0.128	0.205	1	-0.077	ExN.CA1.2	Kctd17
0.00242811	-0.154681	0.261	0.359	1	-0.098	ExN.CA1.2	Arpc1a
0.00243108	0.153669	0.391	0.29	1	0.101	ExN.CA1.2	Gtf2f2
0.00243931	0.183142	0.369	0.292	1	0.077	ExN.CA1.2	Azi2
0.00244147	-0.0974946	0.082	0.136	1	-0.054	ExN.CA1.2	Slc27a4
0.00245711	-0.0913452	0.069	0.118	1	-0.049	ExN.CA1.2	6030458C11Rik
0.00245837	0.163888	0.246	0.167	1	0.079	ExN.CA1.2	B3gnt2
0.00246327	-0.129267	0.186	0.196	1	-0.01	ExN.CA1.2	Itgbl1
0.00247929	0.196852	0.49	0.392	1	0.098	ExN.CA1.2	Cplx1
0.0024908	-0.142074	0.154	0.234	1	-0.08	ExN.CA1.2	Ralgds
0.00250015	0.122445	0.173	0.1	1	0.073	ExN.CA1.2	Itpr2
0.00250097	0.235364	0.22	0.151	1	0.069	ExN.CA1.2	L3mbtl4
0.0025072	0.182248	0.994	0.98	1	0.014	ExN.CA1.2	Ptprn2
0.00251266	0.190691	0.438	0.334	1	0.104	ExN.CA1.2	Gm32442
0.00251334	0.2185	0.397	0.298	1	0.099	ExN.CA1.2	Matn2
0.00251461	0.124149	0.602	0.497	1	0.105	ExN.CA1.2	Prkdc
0.00251716	0.0448439	0.811	0.728	1	0.083	ExN.CA1.2	Plppr4
0.00251771	-0.100652	0.101	0.156	1	-0.055	ExN.CA1.2	Plpbp
0.00252302	-0.101862	0.107	0.149	1	-0.042	ExN.CA1.2	Ercc3
0.00253157	0.142709	0.203	0.136	1	0.067	ExN.CA1.2	Ankrd29
0.00253198	0.153071	0.658	0.555	1	0.103	ExN.CA1.2	Cntln
0.00253243	0.0667916	0.661	0.566	1	0.095	ExN.CA1.2	Klhl2
0.00255208	0.073319	0.219	0.147	1	0.072	ExN.CA1.2	Fbxw2
0.00256051	0.114916	0.959	0.909	1	0.05	ExN.CA1.2	Rtn1
0.00256114	0.177599	0.987	0.967	1	0.02	ExN.CA1.2	Gabrb3
0.00256432	0.125007	0.472	0.37	1	0.102	ExN.CA1.2	Susd1
0.00257908	-0.155852	0.351	0.401	1	-0.05	ExN.CA1.2	Cnot10
0.00258521	-0.170653	0.326	0.388	1	-0.062	ExN.CA1.2	Ptpn23
0.00258719	-0.178959	0.532	0.566	1	-0.034	ExN.CA1.2	Arhgef7
0.00258903	-0.0537763	0.806	0.748	1	0.058	ExN.CA1.2	Smg1
0.00258911	0.150494	0.424	0.321	1	0.103	ExN.CA1.2	Atad1
0.00258959	0.121577	0.266	0.178	1	0.088	ExN.CA1.2	Wwp1
0.00259789	-0.113161	0.197	0.245	1	-0.048	ExN.CA1.2	Porcn
0.00259824	-0.137748	0.142	0.216	1	-0.074	ExN.CA1.2	BC005537
0.00260586	0.143373	0.879	0.804	1	0.075	ExN.CA1.2	Gprasp1
0.00261969	-0.0934614	0.126	0.143	1	-0.017	ExN.CA1.2	Mirt1
0.00263654	-0.10656	0.554	0.539	1	0.015	ExN.CA1.2	Kdm4b
0.00265404	0.0921372	0.8	0.71	1	0.09	ExN.CA1.2	Rap1gap2
0.00265761	0.493963	0.578	0.543	1	0.035	ExN.CA1.2	Adarb2
0.00268218	0.137555	0.987	0.958	1	0.029	ExN.CA1.2	Lncpint
0.00268922	0.151388	0.353	0.256	1	0.097	ExN.CA1.2	Reep3
0.00269382	-0.116713	0.222	0.252	1	-0.03	ExN.CA1.2	Med12
0.00269855	-0.0878464	0.06	0.1	1	-0.04	ExN.CA1.2	Glod4
0.00270682	-0.102606	0.094	0.165	1	-0.071	ExN.CA1.2	Lsm12
0.00270909	-0.160601	0.896	0.882	1	0.014	ExN.CA1.2	Pi4ka
0.00271569	0.0353308	0.969	0.922	1	0.047	ExN.CA1.2	Tanc2
0.00272014	-0.157527	0.261	0.339	1	-0.078	ExN.CA1.2	Fus
0.00273434	0.103805	0.181	0.107	1	0.074	ExN.CA1.2	Sem1
0.00274228	-0.18175	0.701	0.706	1	-0.005	ExN.CA1.2	Ptpra
0.00274241	0.436172	0.887	0.857	1	0.03	ExN.CA1.2	Galntl6
0.00274757	0.237788	0.562	0.459	1	0.103	ExN.CA1.2	Gm31907
0.00274908	0.196535	0.641	0.546	1	0.095	ExN.CA1.2	Elp4
0.00275791	0.161084	0.302	0.216	1	0.086	ExN.CA1.2	Csgalnact2
0.00278884	-0.130642	0.117	0.187	1	-0.07	ExN.CA1.2	Gga1
0.00279142	0.124328	0.85	0.768	1	0.082	ExN.CA1.2	Cdh22
0.00279504	0.0698736	0.176	0.114	1	0.062	ExN.CA1.2	Vcpip1
0.00279515	0.172688	0.471	0.367	1	0.104	ExN.CA1.2	Lrrc28
0.00285007	0.145594	0.265	0.183	1	0.082	ExN.CA1.2	Hif1a
0.00287497	-0.169613	0.753	0.762	1	-0.009	ExN.CA1.2	Ash1l
[truncated: 118,967 more rows]

## Sheet: Number of up and down DEGs 
supplementary Table 1: DEG counts for each celltype in AD and WT. Fc>0.25; padj<0.01.
cell types	up	down															up	down
Ex.CA3.1	1357	19														Oligo	634	1
GABA.2	1090	18
Ex.CA3.2	688	99														OPC	457	8
Micro	648	10
Oligo	634	1
Ex.Neuron	515	29														Ex	2601	674
Epend	479	0														Epend	479	0
OPC	457	8
Ex.CA1.2	416	97														Fibro	1	0
Ast	393	13														Ast	393	13
Endo	387	0														Endo	387	0
Ex.Sub	382	29
Ex.CA1.1	343	117														GABA	1600	61
GABA.4	228	0
GABA.1	169	38
Ex.DG	159	270
GABA.3	113	5
CRC	33	1														CRC	33	1
Per	25	0
Ex.CA1.3	8	0														Micro	648	10
Ex.CA3.3	6	14														Per	25	0
Fibro	1	0
